# Supplementary material for: Spatially Contrasting CO 2 Dynamics Driven by Green Manure Intercropping in Subtropical Tea Plantations
Source: Copernicus journal article supplement (doi:10.5194/egusphere-2025-5065), 2025-11-20
Supplement: Supplementary file [file egusphere-2025-5065-AC3-supplement.pdf]

## **Revision EGUSPHERE-2025-5065**

### **Point by point response to the reviewers:**

First of all, we would like to thank the editor and reviewers for the positive and constructive comments. We carefully revised and improved the article. The followings are response to the comments of reviewers. The line number below is indicated based on the **clean version**.

### **General Comments**

This study focuses on a subtropical tea plantation and utilizes the static chamber–gas chromatography method to conduct long-term monitoring of CO<sub>2</sub> emission fluxes under different green manure intercropping treatments. It systematically reveals the short- and long-term trends and differences in CO<sub>2</sub> fluxes across different areas of the tea garden, including between tea rows, and analyzes the impact of key environmental drivers such as soil temperature, moisture, and organic carbon on carbon emissions. The findings provide important insights into the carbon cycling mechanisms in tea plantations under green manure intercropping and hold significant practical value for promoting low-carbon management in tea cultivation. The experimental design is reasonable, the analysis and discussion are thorough, and the structure is clear, making the paper suitable for publication in this journal. The following minor revisions are recommended:

**Response:** Thank you very much for your positive comments. We have revised the manuscript and answered the questions point by point. The line number below is indicated based on the clean version.

### **Specific Comments:**

1. Lines 153–154: The baseline physicochemical properties of the soil in the study area are not provided. It is recommended to include initial soil characteristics.

**Response:** Thank you for the comments. We have supplemented a detailed table of the basic physicochemical properties of the six treatment soils before the experiment (now Table 1) in Sec. 2.1 Lines 164–166.

“The soil type of the tea plantation is classified as red soil (Ultisol), a typical

soil type in this region, and the initial basic physicochemical properties of the six treatment soils are shown in Table 1.”

2. Line 171: In addition to the green manure treatment, please specify the type and application rate of fertilizers used.

**Response:** Thank you for your comment. Regarding the fertilizer treatments mentioned on line 178-180, the specific types and application rates are as follows:

On October 21, 2022, rapeseed cake was applied as base fertilizer at a rate of 300 kg per mu after trenching and soil turning between the tea rows. On October 28, 2023, base fertilizer consisting of rapeseed cake (65 kg per mu) and compound fertilizer (25 kg per mu) was applied following trenching and soil turning in the tea row inter-rows.

3. Line 185: For consistency, please express time in 24-hour format. Replace “between 9:00 and 11:00 a.m.” with “between 09:00 and 11:00 (local time).”

**Response:** Thank you for the comments. We revised it (Line 192).

4. Line 198: What was the soil sampling depth? This significantly influences soil physicochemical properties. Sampling across multiple soil layers would be more appropriate.

**Response:** Thank you for the suggestion. The soil sampling depth was 0–20 cm. The core focus of this study is the impact of green manure treatments on soil carbon processes in tea plantations. Since the root systems of green manure and their incorporation primarily concentrate in the 0–20 cm soil layer, sampling at this depth most directly reflects the treatment effects. To avoid destructive deep-layer sampling that could harm the root systems of productive tea plants and to ensure the continuity of long-term observations, this biologically active layer was selected as the representative depth, which is also a commonly adopted standard in comparable studies both domestically and internationally. We recognize the value of stratified sampling and will aim to refine this aspect in future research.

5. Lines 216–217: The method for calculating CO<sub>2</sub> fluxes is not clearly described. Please provide details.

**Response:** Thank you for the comments. The description of the CO<sub>2</sub> flux calculation method has been added in the Appendix 1.

6. Lines 308–310: On what basis were the growth stages of green manure defined? Please clarify.

**Response:** Thank you for the comments. The growth stages of green manure are divided as follows: early growth stage (from mid-November to early April of the following year, primarily functioning for soil surface coverage and water-soil conservation), vigorous growth stage (from mid-April to late May, when biomass and nutrient retention peak), wilting stage (from early June to late July, as the plants naturally wither and prepare for incorporation), and decomposition stage (during August each year, when residues rapidly decompose and release nutrients). This division is based on field phenological observations and biomass dynamics, clarifying the functional transition of each stage within the tea garden ecosystem—from growth and accumulation to incorporation and decomposition—to precisely align with the nutrient management needs of tea garden soils.

7. Lines 498–499: The decrease in cumulative emissions between rows in the second year is attributed to “reduced human disturbance,” which is insufficiently supported. Please elaborate with references to relevant literature.

**Response:** Thank you for your comments. Yes, attributing the decrease in CO<sub>2</sub> emissions simply to "reduced anthropogenic disturbance" is overly general. In this study, the cumulative CO<sub>2</sub> emissions from the inter-row areas in the second year were lower than those in the first year across all treatments, with a more pronounced reduction observed in the green manure treatments (HM, SM). We believe this change is closely related to the gradual attenuation of the priming effect caused by initial soil disturbance and the continuous improvement in soil structure

facilitated by green manure growth. We added more discussion in Sec. 4.2 (Lines 513–523).

“The decrease in emissions can be attributed to the gradual attenuation of the carbon priming effect induced by soil disturbance during the initial experimental phase (Zhou, 2025), coupled with the long-term positive effects of green manure on enhancing soil physical structure and ecosystem stability (Gui et al., 2024). The increase in green manure biomass in the following year indicates that the green manure system is transitioning from an initially disturbed and unstable state toward a more productive and carbon-sequestration-enhanced stable state (Figure A1). This trend not only reflects the improved functioning of the soil ecosystem but also serves as an important driver for further carbon sequestration, contributing significantly to the reduction in inter-row CO<sub>2</sub> emissions observed in the following year.”

8. Line 541: The discussion on the SOC threshold lacks adequate references. Additional literature should be cited and discussed.

**Response:** Thank you for the comments. We added more discussion in Sec. 4.3 (Lines 569–574).

“Studies in different climatic zones of China have revealed that SOC thresholds are influenced by factors such as climate and soil type. In the maritime monsoon climate zone, dual thresholds for NO<sub>3</sub><sup>-</sup>-N and extractable iron (Fe) have been identified, beyond which their marginal effects on SOC shift significantly. In the continental monsoon climate zone, SOC content increases markedly once a critical threshold of TN is exceeded (Cui, 2025). Additionally, research in alpine ecosystems has shown that SOC components vary along elevation gradients and exhibit distinct thresholds (Zhang, 2025).”

9. Table 1: Please clearly note “Values are mean ± SE” in the table caption or footnote.

**Response:** Thank you for the comments. We noted “Data shown are means ± SE.” in the table 1 footnote.



10. Root biomass data are lacking. The contribution of green manure roots to soil respiration has not been quantified, which may affect the interpretation of CO<sub>2</sub> flux sources.

**Response:** Thank you for your important comment. We have added Figure A1 in Appendix 1, which presents the green manure biomass (including above ground parts and root systems) for the HM and SM treatments. The biomass was measured as fresh weight immediately after sampling and as dry weight after oven-drying at 65°C to constant weight. We added more discussion in Sec. 4.2 (Lines 517–523).

“The increase in green manure biomass in the following year indicates that the green manure system is transitioning from an initially disturbed and unstable state toward a more productive and carbon-sequestration-enhanced stable state (Figure A1). This trend not only reflects the improved functioning of the soil ecosystem but also serves as an important driver for further carbon sequestration, contributing significantly to the reduction in inter-row CO<sub>2</sub> emissions observed in the following year.”

11. Within the closed chamber environment, temperature and humidity change over time, potentially influencing CO<sub>2</sub> flux measurements. Further analysis on this aspect is recommended.

**Response:** Thank you for the comments. The static chamber method has an inherent limitation: changes in the chamber micro-environment (temperature, humidity, air pressure) during measurement may affect the calculated CO<sub>2</sub> flux. To minimize this impact, the following measures were taken in this experiment:

1. Controlled measurement duration: The chamber closure time was strictly limited to 21 minutes for each measurement to reduce accumulated deviation in the chamber environment.
2. Standardized operation: Measurements were conducted during periods of stable weather. A fan was installed inside the chamber to mix the air, while the exterior was wrapped with aluminum foil and sponge to prevent rapid internal temperature

rise due to direct sunlight during sampling.

3. Linear relationship verification: We ensured that the CO<sub>2</sub> concentration showed a strong linear relationship with time within the selected measurement window ( $R^2 > 0.95$ ), indicating that changes in respiration rate due to chamber environmental variations were not significant during the measurement period.

12. The study does not explore how different green manure treatments regulate microbial activity or the mechanisms by which soil microbial communities drive carbon sequestration. If relevant measurements were not included, this could be addressed in future research.

**Response:** Thank you for the comments. We fully agree that elucidating how green manure treatments drive soil carbon sequestration by regulating microbial activity and community structure is a crucial component for a complete explanation of the ecological mechanisms involved. The current study primarily focuses on the response relationships among green manure, soil physicochemical properties, and CO<sub>2</sub> emission fluxes. Due to limitations in research design and duration, it did not include measurements related to microbial community structure and function. Follow-up research will place greater emphasis on investigating the role of soil microorganisms.

13. The language throughout the manuscript should be further refined to avoid repetitive statements, particularly in the Results and Discussion sections.

**Response:** Thank you for the comments. We have refined the language throughout the manuscript to improve conciseness and eliminate repetitive statements. The revisions have focused on consolidating redundant descriptions, employing more precise and varied phrasing, and strengthening the logical flow of the argument.

**Spatially Contrasting CO<sub>2</sub> Dynamics Driven by Green Manure  
Intercropping in Subtropical Tea Plantations**

**Shuo Liu<sup>1,4</sup>, Zeping Jin<sup>1,3</sup>, Ziyi Chen<sup>1,3</sup>, Haolin Li<sup>1,3</sup>, Zihan Fan<sup>3</sup>, Shaohui Li<sup>3</sup>,  
Haiwang Fu<sup>1,4</sup>, Wei He<sup>1</sup>, Kunpeng Zang<sup>1</sup>, Shuangxi Fang<sup>1,5\*</sup>, Peng Yan<sup>2</sup>**

<sup>1</sup> Zhejiang Carbon Neutral Innovation Institute & Zhejiang International Cooperation Base  
for Science and Technology on Carbon Emission Reduction and Monitoring, Zhejiang  
University of Technology, Hangzhou 310014, China

<sup>2</sup> Key Laboratory of Tea Quality and Safety Control, Ministry of Agriculture, Tea Research  
Institute, Chinese Academy of Agricultural Sciences, Hangzhou 310008, China

<sup>3</sup> College of Environment, Zhejiang University of Technology, Hangzhou 310014, China

<sup>4</sup> Shaoxing Research Institute, Zhejiang University of Technology, Shaoxing 312077, China

<sup>5</sup> State Key Laboratory of Green Chemical Synthesis and Conversion, Zhejiang University of  
Technology, Hangzhou 310014, China

**Correspondence authors:**

**Shuangxi Fang, E-mail: fangsx@zjut.edu.cn**

**Abstract:**

Tea plantations are important contributors to greenhouse gas emissions due to intensive fertilization and continuous cultivation. However, the mechanisms by which green manure intercropping regulates soil CO<sub>2</sub> dynamics in these systems remain poorly understood. We employed the static chamber method over a two-year period, with sampling conducted weekly, to investigate ~~We investigated~~ how intercropping with *Vulpia myuros* (SM) and a legume–nonlegume mixture of *Lolium perenne* and *Trifolium repens* (HM) influenced spatial CO<sub>2</sub> flux dynamics compared with a no-intercropping control (CK) from tea rows and inter-row zones in a subtropical tea plantation. Distinct seasonal variations were observed, with CO<sub>2</sub> fluxes peaking in summer and autumn and declining in spring and winter. ~~Average tea-row fluxes were  $7.41 \pm 0.45$ ,  $7.35 \pm 0.44$ , and  $8.12 \pm 0.46$  mg·m<sup>-2</sup>·min<sup>-1</sup> under SM, HM, and CK, respectively, indicating emission reductions with intercropping. In contrast, inter-row fluxes were higher under SM ( $10.83 \pm 0.52$  mg·m<sup>-2</sup>·min<sup>-1</sup>) and HM ( $9.77 \pm 0.54$  mg·m<sup>-2</sup>·min<sup>-1</sup>) than under CK ( $9.07 \pm 0.44$  mg·m<sup>-2</sup>·min<sup>-1</sup>), demonstrating pronounced spatial contrasts. Average tea-row fluxes were 8.7% and 9.5% lower under SM and HM, respectively, compared to CK, indicating emission reductions with intercropping. In contrast, average inter-row fluxes increased by 19.4% under SM and 7.7% under HM, demonstrating pronounced spatial contrasts. Diurnal patterns exhibited midday peaks (12:00–14:00), especially in spring and summer, and short-term CO<sub>2</sub> pulses were triggered by field operations such as fertilization and pruning. Diurnal patterns generally exhibited midday peaks (12:00–14:00), especially in summer and autumn across all tea-rows, and short-term CO<sub>2</sub> pulses were triggered by field operations such as fertilization and pruning.~~ Notably, HM effectively suppressed fertilization-induced CO<sub>2</sub> pulses, revealing the mitigation potential of legume–nonlegume mixtures. Green manure increased soil organic carbon (6.4%), lowered soil temperature (4.5%), and enhanced porosity (4.2%), collectively shaping CO<sub>2</sub> dynamics. Multivariate analysis identified soil organic carbon (SOC) and temperature as dominant flux drivers, and a potential SOC threshold was detected, beyond which CO<sub>2</sub> emissions accelerated. Compared to CK, ~~While~~ intercropping reduced tea-row emissions by 7.1–7.9% but increased inter-row emissions by 12.7–

49 28.9%~~;~~ based on the two years cumulative emissions, continuous intercropping  
50 significantly decreased overall inter-row emissions over time. These results highlight  
51 the spatially heterogeneous nature of carbon flux regulation and demonstrate the long-  
52 term potential of green manure intercropping as a climate-smart management strategy  
53 in perennial agroecosystems.  
54  
55 **Keywords:** tea plantations, green manure, CO<sub>2</sub> emissions, soil factors

## 1 Introduction

Mitigating greenhouse gas (GHG) emissions to address global warming and associated climate challenges remains a priority in global environmental research. Among long-lived GHGs, carbon dioxide (CO<sub>2</sub>) plays the most prominent role, contributing approximately 66% to the increase in global radiative forcing (IPCC, 2022). In 2023, the global average atmospheric CO<sub>2</sub> concentration reached  $420.0 \pm 0.1$  ppm, representing a 151% increase compared to pre-industrial levels (prior to 1750) (WMO, 2024). Agriculture is a major emission sector, accounting for about 14% of total anthropogenic CO<sub>2</sub> emissions (Wang et al., 2025). In China, this share is even higher, with agricultural activities accounting for up to 17% of national CO<sub>2</sub> emissions (Xu and Lin, 2017). Therefore, accurately characterizing CO<sub>2</sub> emission dynamics in agricultural systems and scientifically informed mitigation strategies are critical for advancing global GHG reduction efforts and promoting sustainable, low-carbon agricultural development (Xu et al., 2024).

Tea (*Camellia sinensis* L.) is an important economic crop in tropical and subtropical regions. Over recent decades, global tea cultivation area has expanded rapidly, reaching 4.70 million hectares in 2022. China has led the most significant growth, with 3.35 million hectares of tea plantations and an annual production of 2.82 million tons, ranking first worldwide in both area and output (FAO, 2024). To maximize yield and improve tea quality, fertilizer inputs to tea cultivation area can be up to four times higher than those applied to staple crops during a single growing season (Zou et al., 2009; Han et al., 2013; Yao et al., 2015). In China, average annual fertilizer use in tea plantations reaches 678 kg ha<sup>-1</sup>, with more than 30% of plantations experiencing over-application (Ni et al., 2019). Such intensive fertilization not only accelerates soil acidification but also significantly increases GHGs emissions from tea plantations (Liu et al., 2016; Yan et al., 2020). However, most existing studies on agricultural CO<sub>2</sub> emissions have focused on staple cropping systems such as wheat (Song et al., 2024), rice (Qian et al., 2023), and maize (Zhang et al., 2020), while studies on CO<sub>2</sub> emissions from tea plantations remain limited.

For instance, Lang et al. (2017) reported that intercropping rubber trees with tea

in the tropical forests of Xishuangbanna, China, reduced CO<sub>2</sub> emissions, although it simultaneously weakened the soil's methane (CH<sub>4</sub>) uptake capacity. Wanyama et al. (2019) found that converting tropical montane forests into tea plantations in Africa decreased annual soil CO<sub>2</sub> emissions to 5.6 t ha<sup>-1</sup>, with emissions positively correlated with soil pH and negatively correlated with the soil C/N ratio. Pang et al. (2019) quantitatively assessed the net ecosystem exchange (NEE) of tea plantations in southeastern China from 2014 to 2017, reporting values ranging from -182.40 to -301.51 g C m<sup>-2</sup>, indicating that tea plantations act as net carbon sinks. However, their carbon sequestration potential was lower than that of other subtropical ecosystems, with temperature identified as the primary factor influencing ecosystem respiration. These findings suggest that CO<sub>2</sub> emissions from tea plantations play a non-negligible role on the carbon exchange between atmosphere and tea plantations. However, the limited number of studies has led to substantial uncertainty on estimating tea plantation CO<sub>2</sub> emissions, restricting our understanding of their contribution to regional and global agricultural GHG budgets (Li et al., 2016; Ji et al., 2020) and hindering the development of low-carbon tea plantations.

In response, there is a growing emphasis on the development of eco-friendly and low-carbon tea plantations (Wang et al., 2022). Toward reduction of fertilizer usage and higher economic efficiency, various management practices were incorporated, including by using green manure. As a modernized agricultural practice, green manure has been widely adopted in farming systems and serves as an important measure for improving soil quality, playing a vital role in sustainable agriculture. Within the context of GHGs mitigation, green manure is recognized as an effective solution for improving soil quality and enhancing CO<sub>2</sub> sequestration in agroecosystems (Forte et al., 2017). However, most studies examining the relationship between green manure and carbon emissions have focused on conventional croplands such as rice and wheat. Comprehensive studies have shown that appropriate green manure management can significantly reduce the global warming potential (GWP) associated with fertilization (Zhang et al., 2024). For instance, Gong et al. (2021) demonstrated that long-term ryegrass cover in organic soybean fields effectively reduced net GWP. In contrast, other

studies have reported that green manure application may increase CO<sub>2</sub> emissions. Kim et al. (2013) found that the application of Chinese milk vetch and ryegrass increased winter CO<sub>2</sub> fluxes in paddy fields by approximately 197% and 266%, respectively. Large-scale assessments have further revealed that green manure tends to increase CO<sub>2</sub> emissions, primarily due to differences in plant species and biomass inputs. Biomass alone explained 63% of the variation in CO<sub>2</sub> emission increases, with emissions declining as the C/N ratio of cover crop biomass increased. Notably, mixed sowing of leguminous and non-leguminous green manures has been shown to improve residue C/N ratios and reduce GHGs emissions (Muhammad et al., 2019).

Existing studies on GHG mitigation in tea systems have predominantly focused on fertilizer reduction and substitution strategies. Wu et al. (2018) conducted a three-year fertilization control experiment in southern China and found that halving nitrogen input decreased nitrous oxide (N<sub>2</sub>O) emissions by 44.5% in tea plantations. In contrast, Yao et al. (2015) reported that organic fertilizer application led to a 71% increase in N<sub>2</sub>O emissions compared to conventional urea, suggesting potential trade-offs in GHG outcomes. Organic amendments, such as compost or manure, have been shown to improve soil fertility, enhance soil structure, porosity, and pH, and promote carbon sequestration in tea plantation soils (Han et al., 2013; Wu et al., 2021). Biochar application has also been identified as an effective strategy for improving soil quality while simultaneously enhancing soil carbon storage and reducing emissions (Wu et al., 2021). The effect of green manure intercropping on tea plantations was mainly focused on improvements in tea plant growth and soil nutrient dynamics. For example, intercropping with green manure species has been shown to enhance nitrogen use efficiency and increase soil microbial diversity (Huang et al., 2023). The potential role of green manure intercropping in mitigating GHGs emissions in tea ecosystems remains poorly understood, and its interactions with key environmental factors have not been fully clarified (Zhu et al., 2018). Green manure may influence CO<sub>2</sub> emissions by altering carbon input levels and inducing soil disturbances, but the specific emission characteristics and driving factors require further investigation.

To address these gaps, this study selected cultivated tea plantations region located



in the east of China, where is recognized as a very important tea cultivation area famous by the tea name of Longjing. Commonly used green manure species in tea systems (*Vulpia myuros* C., *Lolium perenne* L., and *Trifolium repens* L.) were selected for intercropping, covering both leguminous and non-leguminous species, under monoculture and mixed-sowing configurations. CO<sub>2</sub> flux were carried out in both tea rows and inter-row zones across different intercropping treatments. Dynamics and key influencing factors of CO<sub>2</sub> emissions under various green manure intercropping models were analyzed, aiming to reveal the potential reasons by which green manure intercropping regulates carbon fluxes in tea plantations and provide support for the development of low-carbon tea plantations and sustainable regional agriculture.

## 2 Methodology

### 2.1 Monitoring Site

This study was conducted at the Comprehensive Experimental Tea Plantation Base of the Tea Research Institute, Chinese Academy of Agricultural Sciences, located in Shengzhou, Zhejiang Province, China (120°83'E, 29°75'N; elevation 30 m a.s.l.) (Fig. 1a). The site is situated in a low mountainous and hilly region of southeastern China and is characterized by a subtropical monsoon climate. During the experimental period (August 2022 to August 2024), the average annual temperature was approximately 16 °C, with an average annual precipitation of about 1400 mm. The region experiences a concentrated rainy season from April to June and has a frost-free period of around 240 days. The tea cultivated at the site is *Jinmudan*, an elite cultivar derived from the hybridization of *Tieguanyin* and *Huangdan*, and is widely planted across China. The tea plantation was established in 2015;; the tea plants are 8–10 years old and arranged in a single-row planting pattern with a row spacing of 150 cm and a plant spacing of 40 cm.~~The soil type of the tea plantation is classified as red soil (Ultisol), typical soil species in this region.~~ The soil type of the tea plantation is classified as red soil (Ultisol), a typical soil type in this region, and the initial basic physicochemical properties of the six treatment soils are shown in Table 1.

## 2.2 Experimental Setup

Three green manure intercropping treatments were established in this study: *Vulpia myuros* C. (SM), a mixture of *Lolium perenne* L. and *Trifolium repens* L. (HM), and a control treatment without intercropping (CK). The experimental tea plantation covered an area of approximately 1000 m<sup>2</sup>. For each treatment, three representative tea rows were selected as three replicates. Adjacent treatments were separated by two tea rows (~3 m), and replicate areas within the same treatment were spaced approximately 5 m apart. Each treatment has three duplications. Gas fluxes were measured in both tea rows (T) and inter-row zones (G), resulting in six treatments: SMT, SMG, HMT, HMG, CKT, and CKG, with a total of 18 representative sampling points (Fig. 1b, c). Tea plantation followed standard management practices, including fertilization, pruning, and tillage. Basal fertilization and tillage were conducted in middle of October, followed by green manure sowing in early November. On October 21, 2022, rapeseed cake was applied as base fertilizer at a rate of 2250 kg ha<sup>-1</sup> after trenching and soil turning between the tea rows. On October 28, 2023, base fertilizer consisting of rapeseed cake (975 kg ha<sup>-1</sup>) and compound fertilizer (375 kg ha<sup>-1</sup>) was applied following trenching and soil turning in the tea row inter rows. Urea was applied as a topdressing in early February. Tea leaves were harvested in end of March, and pruning was normally conducted in May and July.

Gas sampling was performed using the static chamber–gas chromatography method. The dimensions of the static chambers were 1.25 × 0.8 × 1.0 m for tea rows and 0.3 × 0.3 × 0.5 m for inter-row zones (Fig. 1b). Each chamber was equipped with an internal fan to ensure uniform gas mixing. To avoid rapid heating due to sunlight, the chambers were wrapped with aluminum foil and sponge, functioning as dark chambers. To minimize disturbance, chamber bases with water grooves were installed one month in advance at each sampling point, inserted 15 cm into the soil. During sampling, water was added to the grooves, and the chamber was securely sealed onto the base to create a closed environment. Four gas samples were collected at 7-minute intervals using gas sampling bags.

For seasonal monitoring, sampling was conducted once per week between 09:00 and 11:00 a.m. (local time). Intensive sampling was also carried out following key

management events such as fertilization and pruning. Diurnal variation was monitored over three consecutive days in January, April, July, and October, representing winter, spring, summer, and autumn, respectively. During these campaigns, gas samples were collected every 2 hours over a 24-hour period. All gas samples were analyzed within 24 hours by using a gas chromatograph (Agilent 7890B, Agilent Inc., USA). CO<sub>2</sub> concentrations were measured using a flame ionization detector (FID) at a working temperature of 175 °C. High-purity nitrogen was used as the carrier gas, with an injection volume of ~~30 mL~~ 30 mL and a flow rate of ~~250 mL~~ 250 mL·min<sup>-1</sup>. During the tests, the deviation between the calculated regression values of CO<sub>2</sub> and the nominal mole fractions was 0.37 μmol mol<sup>-1</sup>. The linear fit between the instrument response values and the nominal mole fractions achieved a correlation coefficient (R<sup>2</sup>) of 0.9999. Furthermore, the standard gases used were calibrated in multiple rounds by the Greenhouse Gas Laboratory of the Atmospheric Observation Center of the China Meteorological Administration using primary standard gases, ensuring traceability to the World Meteorological Organization primary standards.

Meteorological data, including precipitation, atmospheric pressure, and air temperature (AT), were obtained from an automatic weather station installed within the tea plantation. Soil samples were recorded using an automatic weather station installed within the tea plantation. Soil samples were collected monthly using a five-point composite method within a 1 m radius of each sampling point. After passing through a 2 mm sieve, the samples were divided into three portions:

- i. One fresh portion was analyzed for microbial biomass carbon (MBC) and microbial biomass nitrogen (MBN) using the chloroform fumigation-extraction method and a TOC analyzer.
- ii. A second portion was air-dried and ground for analysis of soil pH.
- iii. The third portion was stored at 4 °C for analysis of nitrate nitrogen (NO<sub>3</sub><sup>-</sup>-N) and ammonium nitrogen (NH<sub>4</sub><sup>+</sup>-N) by spectrophotometry, total carbon (TC) and total nitrogen (TN) by elemental analysis, and soil organic carbon (SOC) by the dichromate oxidation–spectrophotometry method.

Soil temperature (ST) and volumetric water content (VWC) were measured *in-situ*

using a portable soil sensor (TDR-315H, Acclima). Soil bulk density (BD) and water-filled pore space (WFPS) were determined using the core ring method.

## 2.3 Data Processing

The flux refers to the amount of gas exchanged per unit time and unit area. A positive value indicates net emission to the atmosphere, while a negative value indicates net uptake from the atmosphere (Yao et al., 2015; Zhang et al., 2020). Based on the flux measurements, cumulative CO<sub>2</sub> emissions under different green manure intercropping treatments were also estimated. All data analyses and visualizations were performed using R software. Two-way analysis of variance (Two-way ANOVA) was employed to assess the effects of treatment type and observation period on CO<sub>2</sub> fluxes and soil physicochemical properties. Spearman correlation analysis and Mantel tests were used to examine the relationships between CO<sub>2</sub> flux and environmental variables under different green manure intercropping treatments. Canonical correspondence analysis (CCA) was applied to comprehensively evaluate the influence of soil physicochemical properties on CO<sub>2</sub> emissions. Data shown are means  $\pm$  standard error (SE). In all statistical tests, the level of significant differences and correlations was set at  $p < 0.05$ .

## 3 Results

### 3.1 Long-term Variation of CO<sub>2</sub> Fluxes under Green Manure Intercropping

Figure 2 illustrates the long-term trends of key environmental variables and CO<sub>2</sub> fluxes in the tea plantation throughout the observation period. Overall, CO<sub>2</sub> fluxes from both tea-row and inter-row zones displayed distinct seasonal patterns: higher in summer and autumn, and lower in spring and winter. The seasonal differences between the warm (summer and autumn) and cool (spring and winter) periods were statistically significant (Table 42). The temporal dynamics of CO<sub>2</sub> fluxes closely tracked the trends in air temperature (Fig. 2a), suggesting that temperature is a key driver of soil respiration in tea plantations. Annual fluctuations in CO<sub>2</sub> fluxes were also strongly influenced by field management activities. For example, a sharp increase in CO<sub>2</sub> emissions was observed following basal fertilization in October, and another rise occurred in March of the

following year after topdressing and with the onset of warmer temperatures, ultimately peaking in summer (Fig. 2b-c). The effects of management activities are further detailed in Section 3.3.

In tea rows, the annual mean CO<sub>2</sub> fluxes under HMT and SMT treatments were  $7.35 \pm 0.44 \text{ mg} \cdot \text{m}^{-2} \cdot \text{min}^{-1}$  and  $7.41 \pm 0.45 \text{ mg} \cdot \text{m}^{-2} \cdot \text{min}^{-1}$ , respectively, both lower than that of the control (CKT:  $8.12 \pm 0.46 \text{ mg} \cdot \text{m}^{-2} \cdot \text{min}^{-1}$ ) (Fig. 2b). In contrast, in inter-row zones, the annual mean CO<sub>2</sub> fluxes were significantly higher under HMG ( $9.77 \pm 0.54 \text{ mg} \cdot \text{m}^{-2} \cdot \text{min}^{-1}$ ) and SMG ( $10.83 \pm 0.52 \text{ mg} \cdot \text{m}^{-2} \cdot \text{min}^{-1}$ ) compared to the control (CKG:  $9.07 \pm 0.44 \text{ mg} \cdot \text{m}^{-2} \cdot \text{min}^{-1}$ ) ( $p < 0.05$ ) (Fig. 2c). Across seasons, CKT generally exhibited higher CO<sub>2</sub> fluxes than HMT and SMT, except during winter. In the inter-row zones, both HMG and SMG showed significantly higher fluxes than CKG in summer, while SMG consistently had significantly higher CO<sub>2</sub> emissions than both CKG and HMG during the remaining seasons ( $p < 0.05$ ) (Table 42).

Overall, green manure intercropping significantly increased CO<sub>2</sub> emissions from inter-rows, but reduced emissions in tea rows. In terms of cumulative annual emissions, HMT and SMT resulted in  $3.69 \text{ kg} \cdot \text{m}^{-2}$  and  $3.66 \text{ kg} \cdot \text{m}^{-2}$  of CO<sub>2</sub> emissions, respectively, both lower than the  $3.97 \text{ kg} \cdot \text{m}^{-2}$  under CKT (Fig. 3). Similarly, cumulative CO<sub>2</sub> emissions under HMG and SMG remained consistently higher than under CKG, but they declined from  $5.76 \text{ kg} \cdot \text{m}^{-2}$  and  $6.43 \text{ kg} \cdot \text{m}^{-2}$  in the first year to  $4.16 \text{ kg} \cdot \text{m}^{-2}$  and  $4.92 \text{ kg} \cdot \text{m}^{-2}$  in the second year, respectively (Fig. 3). Two consecutive years of green manure intercropping led to a gradual reduction in CO<sub>2</sub> emissions from inter-rows, indicating its potential role in long-term emission mitigation in tea plantations. CO<sub>2</sub> emissions from inter-rows were substantially higher than those from tea rows. Compared with the control, HM and SM intercropping increased inter-row cumulative CO<sub>2</sub> emissions by 12.7% and 28.9%, respectively, while reducing tea-row emissions by 7.1% and 7.9% (Fig. 3a-b). Inter-row zones accounted for 52.6%, 57.3%, and 60.8% of the total annual CO<sub>2</sub> emissions in the CK, HM, and SM treatments, respectively (Fig. 3c-d), indicating that the inter-row emissions cannot be ignored.

### 3.2 Diurnal CO<sub>2</sub> Variations

CO<sub>2</sub> fluxes in the tea plantation exhibited pronounced diurnal variations across all seasons, particularly in spring and summer (Fig. 4), likely influenced by the growth stages of green manure species. In spring, CO<sub>2</sub> fluxes in tea rows under all treatments showed a similar diurnal trend: an initial decline followed by a rapid increase. HMT and SMT reached their minimum fluxes at 08:00 (local time), with values of  $-3.74 \text{ mg}\cdot\text{m}^{-2}\cdot\text{min}^{-1}$  and  $-3.80 \text{ mg}\cdot\text{m}^{-2}\cdot\text{min}^{-1}$ , respectively, then rose sharply and stabilized in the afternoon. The diurnal amplitudes under HMT and SMT were notably greater than that of the control (CKT) (Fig. 4a). In the inter-row zones, the diurnal patterns under green manure treatments differed notably from the control (Fig. 4b). CKG displayed a unimodal pattern with a peak at 12:00 ( $12.74 \text{ mg}\cdot\text{m}^{-2}\cdot\text{min}^{-1}$ ) and a trough at 08:00 ( $5.45 \text{ mg}\cdot\text{m}^{-2}\cdot\text{min}^{-1}$ ), resulting in an amplitude of  $7.29 \text{ mg}\cdot\text{m}^{-2}\cdot\text{min}^{-1}$ . In contrast, HMG and SMG exhibited later peaks at 16:00 ( $23.26 \text{ mg}\cdot\text{m}^{-2}\cdot\text{min}^{-1}$ ) and 14:00 ( $24.17 \text{ mg}\cdot\text{m}^{-2}\cdot\text{min}^{-1}$ ), respectively, with troughs also at 08:00 (HMG:  $12.28 \text{ mg}\cdot\text{m}^{-2}\cdot\text{min}^{-1}$ ; SMG:  $12.43 \text{ mg}\cdot\text{m}^{-2}\cdot\text{min}^{-1}$ ). Both treatments showed substantially higher amplitudes than CKG.

Summer exhibited the most pronounced diurnal variation of CO<sub>2</sub> fluxes across all seasons. In tea rows, CKT, HMT, and SMT followed a bimodal pattern, with peaks at 02:00 and 12:00, and a trough at 08:00. Their respective diurnal amplitudes were 12.96, 6.70, and  $10.10 \text{ mg}\cdot\text{m}^{-2}\cdot\text{min}^{-1}$  (Fig. 4c). In the inter-rows, the amplitudes were relatively lower, 7.72, 8.12, and  $7.79 \text{ mg}\cdot\text{m}^{-2}\cdot\text{min}^{-1}$  for CKG, HMG, and SMG, respectively, indicating smaller fluctuations compared to tea rows (Fig. 4d). Notably, summer also showed the most distinct contrast between tea rows and inter-rows: CKT recorded the highest average flux in the tea rows, while CKG had the lowest in the inter-rows.

In autumn, tea-row fluxes under all treatments exhibited a unimodal pattern, with minima at 08:00 and peaks at 14:00. The diurnal amplitudes were 11.27, 8.02, and  $12.75 \text{ mg}\cdot\text{m}^{-2}\cdot\text{min}^{-1}$  for CKT, HMT, and SMT, respectively (Fig. 4e). In the inter-rows, HMG and SMG displayed relatively stable diurnal trends, whereas CKG showed a bimodal pattern with peaks at 06:00 and 16:00, and a greater amplitude than both HMG and

SMG (Fig. 4f).

In winter, CO<sub>2</sub> fluxes showed the most stable diurnal variation of the year. In tea rows, amplitudes were only 2.96, 2.84, and 4.92 mg·m<sup>-2</sup>·min<sup>-1</sup> for CKT, HMT, and SMT, respectively (Fig. 4g). Unlike other seasons, 08:00 no longer corresponded to the daily minimum but rather to a relative maximum, with daily peaks generally occurring at 14:00. In inter-rows, diurnal patterns were less defined. SMG exhibited the highest flux at 08:00 (7.57 mg·m<sup>-2</sup>·min<sup>-1</sup>), while HMG showed the lowest at 14:00 (0.99 mg·m<sup>-2</sup>·min<sup>-1</sup>) (Fig. 4h).

### 3.3 Effect of Human Management on CO<sub>2</sub> Fluxes

CO<sub>2</sub> fluxes from the tea field varied significantly across different growth stages of green manure, exhibiting a general increasing trend from the early growth stage to the vigorous, wilting, and decomposition stages (Fig. 5a). In the tea rows, the lowest fluxes were observed during the early growth stage, while the highest occurred during the decomposition stage. Differences among the three treatments (CKT, HMT, and SMT) were minimal during the early growth but became more apparent in the subsequent stages. Notably, during the vigorous stage, both HMT and SMT treatments reduced CO<sub>2</sub> emissions compared to CKT. In contrast, the impact of green manure growth on CO<sub>2</sub> fluxes was more pronounced in the inter-row zones (Fig. 5b). At all growth stages, CO<sub>2</sub> fluxes under the HMG and SMG treatments were significantly higher than those under CKG, with the largest differences observed during the wilting stage. Peak emissions occurred during the decomposition stage for HMG and during the wilting stage for SMG.

Fertilization substantially increased CO<sub>2</sub> emissions across the tea plantation (Fig. 5c-d). In tea rows, the post-fertilization increase in CO<sub>2</sub> flux under HMT was 43.1% lower than that under CKT, whereas SMT showed a 9.2% higher increase. In the inter-row zones, HMG reduced the fertilization-induced increase by 10.4% compared to CKG, while SMG amplified it by 40.1%. These findings indicate that the HM treatment can effectively mitigate CO<sub>2</sub> emissions triggered by fertilization, while SM treatment may intensify them, revealing the potential of legume-based mixed green manure to

reduce CO<sub>2</sub> emissions in tea plantations. It is worth noting that the mitigation effect in the inter-row zones was weaker than in the tea rows, possibly due to differences in root distribution or organic matter inputs.

The effects of grass planting and tea pruning on CO<sub>2</sub> fluxes varied by treatment type and location (tea row or inter-row) (Fig. 5c-d). In the CK treatment, grass planting had no significant impact on CO<sub>2</sub> fluxes. However, the HM treatment led to a marked increase after grass planting, with inter-row fluxes rising by 1.81 mg·m<sup>-2</sup>·min<sup>-1</sup>. Similarly, the SM treatment showed significant increases in both zones, with an increase of 0.90 mg·m<sup>-2</sup>·min<sup>-1</sup> in tea rows and an inter-row increase that was 3.8 times greater. These increases can be attribute to soil disturbance during sowing.

After tea pruning, no significant changes in CO<sub>2</sub> flux were observed in the CK treatment. However, both HMT and SMT significantly increased CO<sub>2</sub> emissions in tea row, with increments of 2.74 mg·m<sup>-2</sup>·min<sup>-1</sup> and 2.94 mg·m<sup>-2</sup>·min<sup>-1</sup>, respectively. In the inter-row zones, only the HMG treatment exhibited a significant post-pruning increase of 3.25 mg·m<sup>-2</sup>·min<sup>-1</sup>. These increases may be attributed to pruning residues covering the green manure surface, which could elevate soil temperature and moisture, thereby enhancing soil respiration and CO<sub>2</sub> emissions.

### 3.4 Effects of Environmental Factors on CO<sub>2</sub> Fluxes

Significant differences in soil nutrient parameters were observed between tea rows and inter-row zones under various green manure intercropping treatments (Fig. 6). Green manure treatments generally increased soil total carbon (TC) and total nitrogen (TN), with consistently higher TC and TN levels in the inter-row zones than in the tea rows (Fig. 6a-b), resulting in significantly higher C/N ratios in the tea rows (Fig. 6c). Soil ammonium nitrogen (NH<sub>4</sub><sup>+</sup>-N) and nitrate nitrogen (NO<sub>3</sub><sup>-</sup>-N) concentrations were also significantly greater in the inter-row zones, with the highest NH<sub>4</sub><sup>+</sup>-N found in CKG (71.20 mg·kg<sup>-1</sup>) and the highest NO<sub>3</sub><sup>-</sup>-N in SMG (14.56 mg·kg<sup>-1</sup>). All green manure treatments significantly increased soil organic carbon (SOC), the average SOC contents under HM and SM were 3.6% and 9.3% higher than under CK, respectively (Fig. 6f). Microbial biomass carbon (MBC) and microbial biomass nitrogen (MBN) showed no



significant differences between tea rows and inter-row zones, but both were slightly elevated under green manure treatments (Fig. 6g-h). Soil pH ranged from 3.6 to 4.5, with no significant differences among treatments, although green manure application slightly increased soil pH (Fig. 6i).

During the monitoring, soil temperature ranged from 2.3–41.8°C in CK, 3.0–37.6°C in HM, and 3.5–36.6°C in SM. Average soil temperatures in HM and SM were 4.5% and 3.9% lower than in CK, indicating a cooling effect of green manure. Additionally, bulk density was reduced by 8.9% and 5.0% in HM and SM compared to CK, while total porosity increased by 5.3% and 3.0%, and WFPS decreased by 29.1% and 11.1%, respectively. These results suggest that green manure intercropping effectively reduces soil compaction and improves soil aeration. The combined effect of these factors is the key to the changes in CO<sub>2</sub> emissions.

To further clarify these relationships, we examined the correlations between CO<sub>2</sub> fluxes and environmental factors under different green manure treatments (Fig. 7). CO<sub>2</sub> fluxes across nearly all treatments were significantly positively correlated with air temperature (AT) and soil temperature (ST) ( $r > 0.5$ ,  $p < 0.05$ ), suggesting temperature as a major driver of CO<sub>2</sub> emissions in tea plantations. Treatment-specific differences were also apparent: in green manure treatments (HM and SM), both TC and SOC in tea rows and inter-row zones showed negative correlations with CO<sub>2</sub> flux, whereas volumetric water content (VWC) showed significant positive correlation ( $r > 0.5$ ,  $p < 0.05$ ). In contrast, VWC was negatively correlated with CO<sub>2</sub> flux under CK treatment. These findings suggest that green manure intercropping alters soil pore structure and moisture regimes, thereby modifying CO<sub>2</sub> emission dynamics compared to bare soil conditions. Additionally, environmental controls on CO<sub>2</sub> fluxes differed between tea rows and inter-row zones. Emissions in tea rows appeared less sensitive to environmental fluctuations, likely due to the moderating effects of tea canopy coverage and root systems.

Canonical correspondence analysis (CCA) was further performed to examine the effect of green manure intercropping patterns and soil properties on CO<sub>2</sub> emissions in tea rows and inter-row zones (Fig. 8). The first two CCA axes explained 52.79% and

11.15% of the total variance, respectively. CCA1 was primarily associated with  $\text{NH}_4^+$ -N,  $\text{NO}_3^-$ -N, SOC, and the C/N ratio, while CCA2 was mainly linked to TN, TC, MBN, MBC, and pH. These results indicate distinct environmental drivers of  $\text{CO}_2$  emissions between the two spatial zones. In tea rows,  $\text{CO}_2$  flux was positively associated with  $\text{NO}_3^-$ -N and the C/N ratio, with relatively minor influence from pH. The influencing soil factors were similar for CKT and SMT, whereas HMT displayed a distinct pattern, likely attributable to the presence of leguminous green manure. In inter-row zones, SOC emerged as the dominant factor controlling  $\text{CO}_2$  fluxes in HMG and SMG treatments, whereas  $\text{NH}_4^+$ -N was the key driver in CKG. Moreover, TC, TN, MBC, and MBN all showed positive associations with inter-row  $\text{CO}_2$  fluxes, with consistent soil drivers under HMG and SMG that differed from CKG, indicating that green manure significantly affects soil- $\text{CO}_2$  interactions.

## 4 Discussion

### 4.1 $\text{CO}_2$ Flux Dynamics under Green Manure Intercropping

This study revealed pronounced seasonal variations in  $\text{CO}_2$  fluxes from tea plantations, which were closely aligned with fluctuations in air temperature (Fig. 2a-c). In spring, rising temperatures enhanced both plant and microbial respiration, leading to a sharp increase in  $\text{CO}_2$  emissions (Yan et al., 2022). During summer, when temperatures reached their annual peak, intensified microbial activity accelerated the decomposition of soil organic matter, resulting in the highest  $\text{CO}_2$  fluxes of the year (Allison et al., 2010). In autumn, declining temperatures and light availability reduced microbial activity and soil respiration, thereby lowering  $\text{CO}_2$  emissions (Liu et al., 2020). In winter, low temperatures significantly inhibited both plant and microbial respiration, causing  $\text{CO}_2$  fluxes to drop to their annual minimum (Schnecker et al., 2023). These seasonal flux patterns were consistent throughout the two-year observation period, indicating the pivotal role of temperature in regulating  $\text{CO}_2$  emissions in tea plantations (Chen et al., 2021).

Compared with the CK treatment, HM and SM increased annual cumulative  $\text{CO}_2$  emissions by 3.3% and 7.9%, respectively, revealing that green manure intercropping

significantly elevated total CO<sub>2</sub> emissions. Similar findings have been reported in previous studies. For example, Lee et al. (2021) observed consistently higher cumulative CO<sub>2</sub> emissions in cropland soils under green manure treatments than under fallow conditions. A meta-analysis by Muhammad et al. (2019) also showed that the use of cover crops generally increases CO<sub>2</sub> emissions compared with bare soil. This effect can be attributed to two possible mechanisms: 1) green manure crops introduce exogenous carbon inputs into the soil, which stimulates CO<sub>2</sub> release (Ho et al., 2021); and 2) green manure intercropping reduces soil bulk density and increases total porosity (Song et al., 2016), thereby improving soil aeration and promoting aerobic microbial activity. The enhanced microbial activity accelerates the decomposition and mineralization of soil organic matter, consequently increasing CO<sub>2</sub> emissions (Chen et al., 2019). By contrast, under the CK treatment, higher WFPS and greater soil compaction may have inhibited gas diffusion and limited CO<sub>2</sub> release into the atmosphere (Lang et al., 2017).

Diurnal variations of CO<sub>2</sub> fluxes were influenced by both seasonal dynamics and the growth stages of green manure crops. CO<sub>2</sub> fluxes fluctuated most sharply during spring and summer, with temperature identified as the primary driver of daily flux patterns (Pang et al., 2019). In spring, negative CO<sub>2</sub> flux peaks were observed in tea rows under HMT and SMT around 08:00, due to low morning temperatures suppressing microbial respiration. Moreover, the presence of easily degradable organic matter from green manure may have diverted microbial metabolism toward biomass accumulation rather than complete mineralization to CO<sub>2</sub>. In summer, distinct spatial differences appeared between tea rows and inter-row zones. In tea rows, CO<sub>2</sub> fluxes under the CKT treatment were significantly higher than those under HMT and SMT, while in the inter-row zones, fluxes under HMG and SMG were higher than those under CKG. This spatial heterogeneity highlights the dual role of green manure: in tea rows, the shading effect of green manure canopy reduced soil temperatures, thereby inhibiting microbial respiration; in contrast, inter-row zones were exposed to direct sunlight, root exudates and decomposing plant residues provided additional carbon sources. Under favorable thermal conditions, this stimulated microbial activity and thus increased CO<sub>2</sub> emissions

(Gui et al., 2024). In autumn and winter, CO<sub>2</sub> flux peaks were mostly recorded in the afternoon, possibly due to rising temperatures reaching a threshold that accelerated enzymatic reactions and microbial metabolism, enhancing root and soil respiration and thus elevating CO<sub>2</sub> emissions (Dove et al., 2021).

## **4.2 Influence of Cultivation Management on CO<sub>2</sub> Fluxes**

Fertilization, pruning, and soil tillage with cover cropping are critical anthropogenic management practices in tea plantations that significantly affect CO<sub>2</sub> flux dynamics. Fertilizer application, in particular, is a major contributor to agricultural greenhouse gas emissions, with emission strength influenced by the type, amount, and method of application (Wang et al., 2024). In this study, the application of rapeseed cake and compound fertilizers significantly increased soil CO<sub>2</sub> fluxes, especially within tea rows. This increase can be attributed to two main factors: 1) the input of exogenous organic matter enriched soil organic carbon content; and 2) trench fertilization caused physical disturbance, disrupting soil aggregates and accelerating the decomposition of soil organic carbon. These disturbances stimulated the abundance and metabolic activity of aerobic heterotrophic microbes, promoting organic matter mineralization and resulting in elevated CO<sub>2</sub> emissions (Chappell et al., 2015; Struck et al., 2020). Intensive pruning conducted in May and August further contributed to increased CO<sub>2</sub> fluxes. Pruning substantially reduces the photosynthetic biomass of tea plants, diminishing their carbon sequestration capacity. Simultaneously, the resulting litterfall provides abundant substrates for microbial respiration (Pang et al., 2019). The combined effect of reduced carbon uptake and increased decomposition substrates leads to a rapid short-term increase in CO<sub>2</sub> emissions after pruning.

Previous studies have demonstrated that intercropping systems introduce readily decomposable carbon through root exudates, while green manure decomposition increases organic matter inputs and improves soil organic carbon storage (Gui et al., 2024). In this study, CO<sub>2</sub> fluxes in inter-row zones were significantly higher than the control during the wilting and decomposition stages of green manure, suggesting that microbial activity was enhanced during these periods, thereby accelerating the

decomposition and transformation of organic matter and intensifying soil respiration. Additionally, soils under green manure treatments exhibited lower annual average temperatures compared to the control, indicating that intercropping with green manure moderated surface soil temperatures and reduced daily temperature fluctuations. This effect was particularly pronounced in summer, when green manure not only reduced inter-row CO<sub>2</sub> emissions but also improved the microclimatic conditions of the tea plantation.

Traditional CO<sub>2</sub> flux measurements in tea plantations have mostly focused only on tea rows, often neglecting inter-row soil emissions (Yao et al., 2015; Chen et al., 2021). In this study, static chambers were parallelly employed to measure CO<sub>2</sub> fluxes in tea rows and inter-row areas, enabling a more accurate understanding of CO<sub>2</sub> emissions. Results showed that inter-row CO<sub>2</sub> fluxes were significantly higher than those in tea rows ( $p < 0.05$ ), accounting for 52.6%, 57.3%, and 60.8% of the annual cumulative CO<sub>2</sub> emissions under CK, HM, and SM treatments, respectively. These findings emphasize the substantial contribution of inter-row zones to overall CO<sub>2</sub> emissions. This discrepancy is due to differences in management intensity: fertilization and tillage are commonly performed in inter-row areas, while the soil beneath tea canopies experiences minimal disturbance (Hirono and Nonaka, 2012). Moreover, pruning residues often accumulate in inter-row zones, further intensifying microbial activity and CO<sub>2</sub> emissions in these areas. The cumulative CO<sub>2</sub> emissions under HMG and SMG treatments were significantly lower in the second year. ~~This reduction may be attributed to reduced human disturbance and the regulatory effects of green manure (Gui et al., 2024). The decrease in emissions can be attributed to the gradual attenuation of the carbon priming effect induced by soil disturbance during the initial experimental phase (Zhou, 2025), coupled with the long-term positive effects of green manure on enhancing soil physical structure and ecosystem stability (Gui et al., 2024). The increase in green manure biomass in the following year indicates that the green manure system is transitioning from an initially disturbed and unstable state toward a more productive and carbon-sequestration-enhanced stable state (Figure A1). This trend not only reflects the improved functioning of the soil ecosystem but also serves as an~~

important driver for further carbon sequestration, contributing significantly to the reduction in inter-row CO<sub>2</sub> emissions observed in the following year. Therefore, long-term and systematic monitoring of inter-row soil CO<sub>2</sub> emissions is essential for accurately assessing the carbon dynamics and mitigation potential of tea plantation ecosystems.

#### 4.3 Differences in Environmental Drivers

Soil CO<sub>2</sub> fluxes are regulated by multiple environmental factors, including photosynthetic activity or vegetation productivity (Tang et al., 2005), and soil properties such as temperature and moisture (Liu et al., 2023; Widanagamage et al., 2025). Among them, temperature is widely recognized as a primary driver of seasonal variation in soil respiration (Lang et al., 2017). Our results showed that CO<sub>2</sub> fluxes in both tea rows and inter-row areas were significantly correlated with soil and air temperatures under different green manure treatments (Fig. 7). In addition, carbon and nitrogen transformation processes driven by microorganisms are closely coupled. Nitrification and denitrification alter NO<sub>3</sub><sup>-</sup>-N and NH<sub>4</sub><sup>+</sup>-N levels, thereby influencing soil physicochemical properties and microbial activity. As a result, CO<sub>2</sub> emissions exhibit significant positive correlations with nitrogen mineralization, denitrification, and N<sub>2</sub>O emissions (Dai et al., 2020). This carbon–nitrogen coupling may interact with the distinctive nutrient uptake characteristics of tea plants, which are ammonium-preferring species with rapid NH<sub>4</sub><sup>+</sup> assimilation (Xin et al., 2024). In our study, CO<sub>2</sub> fluxes under the CKG treatment were positively correlated with NH<sub>4</sub><sup>+</sup>-N content (Fig. 9). NH<sub>4</sub><sup>+</sup>-N levels under this treatment (71.20 mg·kg<sup>-1</sup>) were significantly higher than in the SMG and HMG treatments, whereas the corresponding soil pH value (3.97) was significantly lower ( $p < 0.05$ ). This concurrent high NH<sub>4</sub><sup>+</sup>-N level and strong acidification is due to ammonium accumulation under conventional fertilization and subsequent H<sup>+</sup> release during nitrification (Chen et al., 2021). By contrast, the soil pH under green manure intercropping treatments increased by 0.02–0.11 units compared to the CK treatment (Fig. 6i), suggesting that root exudates and organic matter inputs from green manure buffered soil acidification by reducing H<sup>+</sup> release during NH<sub>4</sub><sup>+</sup> nitrification. Moreover,

the  $\text{NO}_3^-$ -N concentration in the SMG treatment ( $14.56 \text{ mg}\cdot\text{kg}^{-1}$ ) was significantly higher than that in other treatments (Fig. 6e), due to the high biomass of *Vulpia myuros* C., which may reduce nitrate losses via runoff or leaching. Its active root system also improved soil aeration, inhibiting denitrification under anoxic conditions.

SOC content reflects the dynamic balance between organic matter inputs and decomposition (Mo et al., 2024). In our study, SOC levels in the HMT and SMT treatments were higher than those in the CKT treatment, while their cumulative annual  $\text{CO}_2$  emissions were lower. This indicates that increasing SOC storage can help mitigate greenhouse gas emissions, consistent with findings by Han et al. (2022). However, the HMG and SMG treatments exhibited much higher SOC levels than CKG, while their cumulative  $\text{CO}_2$  emissions exceeded those of CKG. This implies that once SOC accumulation surpasses a certain threshold, the excess carbon supply may stimulate microbial activity and subsequently increase  $\text{CO}_2$  emissions (Lim and Choi, 2014). Interestingly, recent studies reveal that SOC thresholds can modulate the impact of nitrogen fertilization on carbon sequestration. In SOC-poor soils, nitrogen inputs tend to promote carbon accumulation and soil aggregation, enhancing SOC storage. Conversely, in SOC-rich soils, nitrogen fertilization may enhance microbial metabolic efficiency and increase microbial residue production (Ling et al., 2025). Studies in different climatic zones of China have revealed that SOC thresholds are influenced by factors such as climate and soil type. In the maritime monsoon climate zone, dual thresholds for  $\text{NO}_3^-$ -N and extractable iron (Fe) have been identified, beyond which their marginal effects on SOC shift significantly. In the continental monsoon climate zone, SOC content increases markedly once a critical threshold of TN is exceeded (Cui, 2025). Additionally, research in alpine ecosystems has shown that SOC components vary along elevation gradients and exhibit distinct thresholds (Zhang, 2025). These insights provide a new perspective for interpreting our results and highlight the importance of identifying threshold values under multifactorial interactions to better assess their effects on  $\text{CO}_2$  emissions.

In tea rows, excessively high soil C/N ratios may result in nitrogen limitation, thereby inhibiting rapid decomposition of organic matter and reducing  $\text{CO}_2$  fluxes.

Green manure, as a fresh plant residue with a relatively low C/N ratio, can be rapidly decomposed by soil microbes after incorporation, thus maintaining or enhancing SOC levels (Li et al., 2024), which aligns with our observations (Fig. 7d). MBC and MBN are generally considered closely linked to SOC (Gao et al., 2022). However, in our study, a significant positive correlation between MBC and SOC was only observed in the CKT treatment. The lack of correlation under green manure treatments may be due to the rapid and excessive input of exogenous carbon, which complicates the relationship between these variables. No significant differences in MBC and MBN levels were found among green manure treatments, and both showed weak correlations with CO<sub>2</sub> fluxes (Fig. 8), suggesting that MBC and MBN are not key drivers of CO<sub>2</sub> emissions in tea plantations.

## 5 Conclusion

This study revealed the regulation of CO<sub>2</sub> fluxes in tea plantations under different green manure intercropping treatments. Green manure significantly influenced CO<sub>2</sub> flux dynamics, with pronounced seasonal variations, higher fluxes in summer and autumn and lower fluxes in spring and winter. CO<sub>2</sub> emissions from inter-row areas were consistently higher than those from tea rows. CO<sub>2</sub> fluxes in the SM and HM treatments were significantly lower than in the CK treatment within tea rows, while the opposite trend was observed in inter-row areas, suggesting distinct spatial responses to green manure intercropping. Over the observation period, the HM and SM treatments reduced CO<sub>2</sub> emissions from tea rows by 7.1%–7.9% compared to the CK, while increasing inter-row emissions by 12.7%–28.9%. Inter-row CO<sub>2</sub> emissions accounted for 52.6%, 57.3%, and 60.8% of the annual cumulative CO<sub>2</sub> fluxes under the CK, HM, and SM treatments, respectively. These findings highlight the importance of incorporating spatial emission weighting into carbon accounting for agricultural ecosystems.

The observed spatial differences in CO<sub>2</sub> fluxes were closely related to variations in SOC content. Our findings suggest the existence of a critical SOC threshold that determines whether CO<sub>2</sub> emissions increase or decrease. Future research should focus on quantifying such thresholds under multi-factor interactions to better assess their



625 impacts on greenhouse gas dynamics. ~~Continuous green manure intercropping over two~~  
626 ~~years significantly mitigated CO<sub>2</sub> emissions from inter-row areas. The HM treatment~~  
627 ~~exhibited distinct diurnal CO<sub>2</sub> flux patterns and effectively suppressed fertilization-~~  
628 ~~induced CO<sub>2</sub> emissions. These results demonstrate that green manure intercropping,~~  
629 ~~particularly mixed legume and non-legume combinations, not only modifies the spatial~~  
630 ~~pattern of CO<sub>2</sub> emissions in tea plantations but also provides a practical strategy for~~  
631 ~~mitigating carbon losses from managed agroecosystems.~~Continuous green manure  
632 intercropping over two years significantly reduced inter-row CO<sub>2</sub> emissions, and the  
633 HM treatment suppressed fertilization-induced emission peaks. These findings  
634 demonstrate that green manure intercropping, particularly mixed legume and non-  
635 legume combinations, can effectively alter the spatial pattern of CO<sub>2</sub> emissions and  
636 mitigate carbon losses. Moreover, this practice provides significant co-benefits like  
637 improved soil aeration and fertility, reduced chemical fertilizers, weed suppression, and  
638 promoted tea plant growth, thereby offsetting the extra costs in labor and seeds.  
639 Therefore, green manure intercropping emerges as a practical and multifunctional  
640 strategy for reducing carbon emissions in agroecosystems.~~Moreover, this practice~~  
641 ~~provides multiple co-benefits, such as improving soil aeration, enhancing soil fertility~~  
642 ~~to reduce chemical fertilizer use, suppressing weeds, and promoting tea plant growth—~~  
643 ~~factors that can economically offset the additional labor and seed costs. In summary,~~  
644 ~~green manure intercropping offers a viable strategy for carbon emission reduction in~~  
645 ~~agricultural ecosystems.~~

#### 646 647 648 **Data availability**

649 The datasets generated and analyzed during this study are available from the  
650 corresponding author upon reasonable request.

#### 651 652 653 **Author contributions**

S. Liu conceived and designed the study, performed the data analysis, and drafted the manuscript. S. Liu, Z. Jin, and Z. Chen contributed to data visualization. H. Li, Z. Fan, S. Li, H. Fu, K. Zang, W. He, and P. Yan conducted field and laboratory work. S. Fang supervised the research, provided funding, and contributed to manuscript review and editing.

#### **Competing interests**

The contact author has declared that none of the authors has any competing interests.

#### **Acknowledgments**

This study was funded by the National Natural Science Foundation of China (42307126), the National Key Research and Development Program of China (2023YFC3705205), Key Scientific Research Project of Tea Research Institute, Chinese Academy of Agricultural Sciences (TRI-ZDRW-01-04), Open Fund Project of Key Open Laboratory of Ecosystem Carbon Sources and Sinks (ECSS-CMA202309), and the Zhejiang Provincial Research Development Program (2024C03246). We also thanks to the staff who have contributed to the flux measurements at Shengzhou.

## References

- Allison, S.D., Wallenstein, M.D., and Bradford, M.A.: Soil-carbon response to warming dependent on microbial physiology, *Nat. Geosci.*, 3, 336–340, <http://doi.org/10.1038/ngeo846>, 2010.
- Chappell, A., Baldock, J., and Sanderman, J.: The global significance of omitting soil erosion from soil organic carbon cycling schemes, *Nat. Clim. Chang.*, 6, 187–191, <http://doi.org/10.1038/nclimate2829>, 2015.
- Chen, D., Li, Y., Wang, C., Liu, X., Wang, Y., Shen, J., Qin, J., and Wu, J.: Dynamics and underlying mechanisms of N<sub>2</sub>O and NO emissions in response to a transient land-use conversion of Masson pine forest to tea field, *Sci. Total Environ.*, 693, 133549, <http://doi.org/10.1016/j.scitotenv.2019.07.355>, 2019.
- Chen, D., Wang, C., Li, Y., Liu, X., Qin, J., and Wu, J.: Effects of land-use conversion from Masson pine forests to tea plantations on net ecosystem carbon and greenhouse gas budgets. *Agric. Ecosyst. Environ.*, 320, 107578, <http://doi.org/10.1016/j.agee.2021.107578>, 2021.
- Cui, J., Xu, Y., Wang, M., Liu, A., Sun, L., Feng, X., Yang, Q., Wang, S., Liu, H., Lv, Y., and Liu, K.: Nonlinear threshold responses and spatial heterogeneity of soil organic carbon under contrasting pedoclimatic regimes, *Front. Plant Sci.*, 16, 1703663, <http://doi.org/10.3389/fpls.2025.1703663>, 2025.
- Dai, Z., Yu, M., Chen, H., Zhao, H., Huang, Y., Su, W., Xia, F., Chang, S., Brookes, P., Dahlgren, R., and Xu, J.: Elevated temperature shifts soil N cycling from microbial immobilization to enhanced mineralization, nitrification and denitrification across global terrestrial ecosystems, *Glob. Change Biol.*, 26, 5267–5276, <http://doi.org/10.1111/gcb.15211>, 2020.
- Dove, N., Torn, M.S., Hart, S.C., and Tas, N.: Metabolic capabilities mute positive response to direct and indirect impacts of warming throughout the soil profile, *Nat. Commun.*, 12, 2089, <http://doi.org/10.1038/s41467-021-22408-5>, 2021.
- FAO, Statistical databases: <https://www.fao.org/faostat/en/#data/>, last accessed: 11 June 2025.
- Gao, D., Bai, E., Wang, S., Zong, S., Liu, Z., Fan, X., Zhao, C., and Hagedorn, F.:

703 Three-dimensional mapping of carbon, nitrogen, and phosphorus in soil  
 704 microbial biomass and their stoichiometry at the global scale, *Glob. Change*  
 705 *Biol.*, 28, 6728–6740, <http://doi.org/10.1111/gcb.16374>, 2022.

706 Gong, Y., Li, P., Sakagami, N., and Komatsuzaki, M.: No-tillage with rye cover crop  
 707 can reduce net global warming potential and yield-scaled global warming  
 708 potential in the long-term organic soybean field, *Soil Tillage Res.*, 205, 104747,  
 709 <http://doi.org/10.1016/j.still.2020.104747>, 2021.

710 Gui, D., Zhang, Y., Lv, J., Guo, J., and Sha, Z.: Effects of intercropping on soil  
 711 greenhouse gas emissions - A global meta-analysis, *Sci. Total Environ.*, 918,  
 712 170632, <http://doi.org/10.1016/j.scitotenv.2024.170632>, 2024.

713 Han, W., Xu, J., Wei, K., Shi, Y., and Ma, L.: Estimation of N<sub>2</sub>O emission from tea  
 714 garden soils, their adjacent vegetable garden and forest soils in eastern China,  
 715 *Environ. Earth Sci.*, 70, 2495–2500, <http://doi.org/10.1007/s12665-013-2292-4>,  
 716 2013.

717 Han, Z., Lin, H., Xu, P., Li, Z., Wang, J., and Zou, J.: Impact of organic fertilizer  
 718 substitution and biochar amendment on net greenhouse gas budget in a tea  
 719 plantation, *Agric. Ecosyst. Environ.*, 326, 107779,  
 720 <http://doi.org/10.1016/j.agee.2021.107779>, 2022.

721 Hirono, Y., and Nonaka, K.: Nitrous oxide emissions from green tea fields in Japan:  
 722 contribution of emissions from soil between rows and soil under the canopy of  
 723 tea plants, *Soil Sci. Plant Nutr.*, 58, 384–392,  
 724 <http://doi.org/10.1080/00380768.2012.686434>, 2012.

725 Huang, X., Zheng, Y., Li, P., Cui, J., Sui, P., Chen, Y., and Gao, W.: Organic  
 726 management increases beneficial microorganisms and promotes the stability of  
 727 microecological networks in tea plantation soil, *Front. Microbiol.*, 14, 1237842,  
 728 <http://doi.org/10.3389/fmicb.2023.1237842>, 2023.

729 IPCC: Climate Change 2022: Impacts, Adaptation, and Vulnerability, contribution of  
 730 Working Group II to the Sixth Assessment Report of the Intergovernmental  
 731 Panel on Climate Change, Cambridge University Press, Cambridge, 2022.

732 Ji, C., Li, S., Geng, Y., Yuan, Y., Zhi, J., Yu, K., Han, Z., Wu, S., Liu, S., and Zou, J.:

733 Decreased N<sub>2</sub>O and NO emissions associated with stimulated denitrification  
 734 following biochar amendment in subtropical tea plantations, *Geoderma*, 365,  
 735 114223, <http://doi.org/10.1016/j.geoderma.2020.114223>, 2020.

736 Kim, S.Y., Lee, C.H., Gutierrez, J., and Kim, P.J.: Contribution of winter cover crop  
 737 amendments on global warming potential in rice paddy soil during cultivation,  
 738 *Plant Soil*, 366, 273–286, <http://doi.org/10.1007/s11104-012-1403-4>, 2013.

739 Lang, R., Blagodatsky, S., Xu, J., and Cadisc, G.: Seasonal differences in soil  
 740 respiration and methane uptake in rubber plantation and rainforest, *Agric.*  
 741 *Ecosyst. Environ.*, 240, 314–328, <http://doi.org/10.1016/j.agee.2017.02.032>,  
 742 2017.

743 Lee, L.H., Kim, S.U., Han, H.R., Hur, D., Owens, V.N., Kumar, S., and Hong, C.O.:  
 744 Mitigation of global warming potential and greenhouse gas intensity in arable  
 745 soil with green manure as source of nitrogen, *Environ. Pollut.*, 288, 117724,  
 746 <http://doi.org/10.1016/j.envpol.2021.117724>, 2021.

747 Li, B., Gasser, T., Ciais, P., Piao, S., Tao, S., Balkanski, Y., Hauglustaine, D., Boisier,  
 748 J.P., Chen, Z., Huang, M., Li, L., Li, Y., Liu, H., Liu, J., Peng, S., Shen, Z., Sun,  
 749 Z., Wang, R., Wang, T., Yin, G., Yin, Y., Zeng, H., Zeng, Z., and Zhou, F.: The  
 750 contribution of China's emissions to global climate forcing, *Nature*, 531, 357–  
 751 361, <http://doi.org/10.1038/nature17165>, 2016.

752 Li, P., Jia, L., Chen, Q., Zhang, H., Deng, J., Lu, J., Xu, L., Li, H., Hu, F., and Jiao, J.:  
 753 Adaptive evaluation for agricultural sustainability of different fertilizer  
 754 management options for a green manure-maize rotation system: Impacts on crop  
 755 yield, soil biochemical properties and organic carbon fractions, *Sci. Total*  
 756 *Environ.*, 908, 168170, <http://doi.org/10.1016/j.scitotenv.2023.168170>, 2024.

757 Lim, S.S., and Choi, W.J.: Changes in microbial biomass, CH<sub>4</sub> and CO<sub>2</sub> emissions, and  
 758 soil carbon content by fly ash co-applied with organic inputs with contrasting  
 759 substrate quality under changing water regimes, *Soil Biol. and Biochem.*, 68,  
 760 494–502, <http://doi.org/10.1016/j.soilbio.2013.10.027>, 2014.

761 Ling, J., Dungait, J.A.J., Delgado, B.M., Cui, Z., Zhou, R., Zhang, W., Gao, Q., Chen,  
 762 Y., Yue, S., Kuzyakov, Y., Zhang, F., Chen, X., and Tian, J.: Soil organic carbon

763 thresholds control fertilizer effects on carbon accrual in croplands worldwide,  
 764 Nat. Commun., 16, 3009–3009, <http://doi.org/10.1038/s41467-025-57981-6>,  
 765 2025.

766 Liu, S., Lin, F., Wu, S., Ji, C., Sun, Y., Jin, Y., Li, S., Li, Z., and Zou, J.: A meta-analysis  
 767 of fertilizer-induced soil NO and combined NO+N<sub>2</sub>O emissions. Glob. Change  
 768 Biol., 23, 2520–2532, <http://doi.org/10.1111/gcb.13485>, 2016.

769 Liu, Z., Liu, W., Liu, H., Gao, T., Zhao, H., Li, G., Han, H., Li, Z., Lal, R., and Ning,  
 770 T.: Capture of soil respiration for higher photosynthesis with lower CO<sub>2</sub>  
 771 emission, J. Clean Prod., 246, 119029,  
 772 <http://doi.org/10.1016/j.jclepro.2019.119029>, 2020.

773 Liu, C., Bol, R., Ju, X., Ju, X., Tian, J., and Wu, D.: Trade-offs on carbon and nitrogen  
 774 availability lead to only a minor effect of elevated CO<sub>2</sub> on potential  
 775 denitrification in soil, Soil Biol. Biochem., 176, 108888,  
 776 <http://doi.org/https://doi.org/10.1016/j.soilbio.2022.108888>, 2023.

777 Mo, F., Yang, D., Wang, X., Crowther, T.W., Vinay, N., Luo, Z., Yu, K., Sun, S., Zhang,  
 778 F., Xiong, Y., and Liao, Y.: Nutrient limitation of soil organic carbon stocks  
 779 under straw return, Soil Biol. Biochem., 192, 109360,  
 780 <http://doi.org/10.1016/j.soilbio.2024.109360>, 2024.

781 Muhammad, I., Sainju, U.M., Zhao, F., Khan, A., Ghimire, R., Fu, X., and Wang, J.:  
 782 Regulation of soil CO<sub>2</sub> and N<sub>2</sub>O emissions by cover crops: A meta-analysis, Soil  
 783 Tillage Res., 192, 103–112, <http://doi.org/10.1016/j.still.2019.04.020>, 2019.

784 Ni, K., Liao, W., Yi, X., Niu, S., Ma, L., Shi, Y., Zhang, Q., Liu, M., and Ruan, J.:  
 785 Fertilization status and reduction potential in tea gardens of China, J. Plant Nutr.  
 786 Fert., 25, 421–432, 2019.

787 Pang, J., Li, H., Tang, X., and Geng, J.: Carbon dynamics and environmental controls  
 788 of a hilly tea plantation in Southeast China, Ecol. Evol. 9, 9723–9735,  
 789 <http://doi.org/10.1002/ece3.5504>, 2019.

790 Qian, H., Zhu, X., Huang, S., Linqvist, B., Kuzyakov, Y., Wassmann, R., Minamikawa,  
 791 K., Martinez, E.M., Yan, X., Zhou, F., Sander, B.O., Zhang, W., Shang, Z., Zou,  
 792 J., Zheng, X., Li, G., Liu, Z., Wang, S., Ding, Y., van Groenigen, K.J., and Jiang,

793 Y.: Greenhouse gas emissions and mitigation in rice agriculture, *Nat. Rev. Earth*  
 794 *Environ.*, 4, 716–732, <http://doi.org/10.1038/s43017-023-00482-1>, 2023.

795 Schneckner, J., Baldaszti, L., Gündler, P., Pleitner, M., Sandén, T., Simon, E., Spiegel,  
 796 F., Spiegel, H., Urbina Malo, C., Zechmeister-Boltenstern, S., and Richter, A.:  
 797 Seasonal dynamics of soil microbial growth, respiration, biomass, and carbon  
 798 use efficiency in temperate soils, *Geoderma* 440, 116693,  
 799 <http://doi.org/10.1016/j.geoderma.2023.116693>, 2023.

800 Song, L., Liao, W., Wang, Y., Su, Y., Zhang, Y., Luo, Y., and Sun, L.: Effects of  
 801 Interplanting Green Manure on Soil Physico-chemical Characters in Tea  
 802 Plantation, *Soils* 48, 675–679, 2016.

803 Song, J., Song, J., Xu, W., Gao, G., Bai, J., Zhang, Z., Yu, Q., Hao, J., Yang, G., Ren,  
 804 G., Feng, Y., and Wang, X.: Straw return with fertilizer improves soil CO<sub>2</sub>  
 805 emissions by mitigating microbial nitrogen limitation during the winter wheat  
 806 season, *Catena* 241, 108050, <http://doi.org/10.1016/j.catena.2024.108050>, 2024.

807 Struck, I.J.A., Taube, F., Hoffmann, M., Kluß, C., Herrmann, A., Loges, R., and Reinsch,  
 808 T.: Full greenhouse gas balance of silage maize cultivation following grassland:  
 809 Are no-tillage practices favorable under highly productive soil conditions?, *Soil*  
 810 *Tillage Res.*, 200, 104615, <http://doi.org/10.1016/j.still.2020.104615>, 2020.

811 Tang, J., Baldocchi, D.D., and Xu, L.: Tree photosynthesis modulates soil respiration  
 812 on a diurnal time scale, *Glob. Change Biol.*, 11, 1298–1304,  
 813 <http://doi.org/10.1111/j.1365-2486.2005.00978.x>, 2005.

814 Wang, J., Smith, P., Hergoualc'h, K., and Zou, J.: Direct N<sub>2</sub>O emissions from global tea  
 815 plantations and mitigation potential by climate-smart practices, *Resour. Conserv.*  
 816 *Recycl.*, 185, 106501, <http://doi.org/10.1016/j.resconrec.2022.106501>, 2022.

817 Wang, B., Wang, S., Li, G., Fu, L., Chen, H., Yin, M., and Chen, J.: Reducing nitrogen  
 818 fertilizer usage coupled with organic substitution improves soil quality and  
 819 boosts tea yield and quality in tea plantations, *J. Sci. Food Agric.*, 105, 1228–  
 820 1238, <http://doi.org/10.1002/jsfa.13913>, 2024.

821 Wang, G., Zhao, M., Zhao, B., Liu, X., and Wang, Y.: Reshaping Agriculture Eco-  
 822 efficiency in China: From Greenhouse Gas Perspective, *Ecol. Indic.*, 172,

113268, <http://doi.org/10.1016/j.ecolind.2025.113268>, 2025.

Wanyama, I., Pelster, D.E., Butterbach-Bahl, K., Verchot, L. V., Martius, C., and Rufino, M. C.: Soil carbon dioxide and methane fluxes from forests and other land use types in an African tropical montane region, *Biogeochemistry*, 143, 171–190, <http://doi.org/10.1007/s10533-019-00555-8>, 2019.

Widanagamage, N., Santos, E., Rice, C.W., and Patrignani, A.: Study of soil heterotrophic respiration as a function of soil moisture under different land covers, *Soil Biol. Biochem.*, 200, 109593, <http://doi.org/10.1016/j.soilbio.2024.109593>, 2025.

WMO: Greenhouse Gas Bulletin-No. 20: The state of greenhouse gases in the atmosphere based on global observations through 2023, WMO Greenhouse Gas Bulletin, Switzerland, 2024.

Wu, Y., Li, Y., Fu, X., Shen, J., Chen, D., Wang, Y., Liu, X., Xiao, R., Wei, W., and Wu, J.: Effect of controlled-release fertilizer on N<sub>2</sub>O emissions and tea yield from a tea field in subtropical central China, *Environ. Sci. Pollut. Res.*, 25, 25580–25590, <http://doi.org/10.1007/s11356-018-2646-2>, 2018.

Wu, Y., Li, Y., Wang, H., Wang, Z., Fu, X., Shen, J., Wang, Y., Liu, X., Meng, L., and Wu, J.: Response of N<sub>2</sub>O emissions to biochar amendment on a tea field soil in subtropical central China: A three-year field experiment, *Agric. Ecosyst. Environ.*, 318, 107473, <http://doi.org/10.1016/j.agee.2021.107473>, 2021.

Xin, W., Zhang, J., Yu, Y., Tian, Y., Li, H., Chen, X., Li, W., Liu, Y., Lu, T., He, B., Xiong, Y., Yang, Z., Xu, T., and Tang, W.: Root microbiota of tea plants regulate nitrogen homeostasis and theanine synthesis to influence tea quality, *Curr. Biol.*, 34, 868–880, <http://doi.org/10.1016/j.cub.2024.01.044>, 2024.

Xu, B., and Lin, B.: Factors affecting CO<sub>2</sub> emissions in China's agriculture sector: Evidence from geographically weighted regression model, *Energy Policy*, 104, 404–414. <http://doi.org/10.1016/j.enpol.2017.02.011>, 2017.

Xu, X., Zhao, Q., Guo, J., Li, C., Li, J., Niu, K., Jin, S., Fu, C., Gaffney, P.P.J., Xu, Y., Sun, M., Xue, Y., Chang, D., Zhang, Y., Si, W., Fan, S., and Zhang, L.: Inequality in agricultural greenhouse gas emissions intensity has risen in rural



853 China from 1993 to 2020, *Nat. Food*, 5, 916–928,  
854 <http://doi.org/10.1038/s43016-024-01071-1>, 2024.

855 Yan, P., Wu, L., Wang, D., Fu, J., Shen, C., Li, X., Zhang, L., Zhang, L., Fan, L., and  
856 Han W.: Soil acidification in Chinese tea plantations, *Sci. Total Environ.*, 715,  
857 136963, <http://doi.org/10.1016/j.scitotenv.2020.136963>, 2020.

858 Yan, W., Zhong, Y., Yang, J., and Torn, M.S.: Response of soil greenhouse gas fluxes  
859 to warming: A global meta-analysis of field studies, *Geoderma*, 419, 115865,  
860 <http://doi.org/10.1016/j.geoderma.2022.115865>, 2022.

861 Yang, X., Xiong, J., Du, T., Ju, X., Gan, Y., Li, S., Xia, L., Shen, Y., Pacenka, S.,  
862 Steenhuis, T.S., Siddique, K.H.M., Kang, S., and Butterbach-Bahl, K.:  
863 Diversifying crop rotation increases food production, reduces net greenhouse  
864 gas emissions and improves soil health, *Nat. Commun.*, 15, 198,  
865 <http://doi.org/10.1038/s41467-023-44464-9>, 2024.

866 Yao, Z., Wei, Y., Liu, C., Zheng, X., Xie, B.: Organically fertilized tea plantation  
867 stimulates N<sub>2</sub>O emissions and lowers NO fluxes in subtropical China,  
868 *Biogeosciences*, 12, 5915–5928, <http://doi.org/10.5194/bg-12-5915-2015>, 2015.

869 Zhang, Q., Lei, H., Yang, D., Xiong, L., Liu, P., and Fang, B.: Decadal variation in CO<sub>2</sub>  
870 fluxes and its budget in a wheat and maize rotation cropland over the North  
871 China Plain, *Biogeosciences*, 17, 2245–2262, [http://doi.org/10.5194/bg-17-](http://doi.org/10.5194/bg-17-2245-2020)  
872 [2245-2020](http://doi.org/10.5194/bg-17-2245-2020), 2020.

873 Zhang, W., Lu, J., Bai, J., Khan, A., Liu, S., Zhao, L., Wang, W., Zhu, S., Li, X., Tian,  
874 X., Li, S., and Xiong, Y.: Introduction of soybean into maize field reduces N<sub>2</sub>O  
875 emission intensity via optimizing nitrogen source utilization, *J. Clean Prod.*, 442,  
876 141052, <http://doi.org/10.1016/j.jclepro.2024.141052>, 2024.

877 [Zhang, S., Huang, F., Guo, S., Luo, Y., Zhang, L., Zhang, L., Li, Z., Ge, S., Wang, H.,](http://doi.org/10.1016/j.jclepro.2024.141052)  
878 [Fu, J., Li, X., and Yan, P.: Mitigation of soil organic carbon mineralization in](http://doi.org/10.1016/j.jclepro.2024.141052)  
879 [tea plantations through replacement of pruning litter additions with pruning](http://doi.org/10.1016/j.jclepro.2024.141052)  
880 [litter derived biochar and organic fertilizer, \*Ind. Crops Prod.\*, 225, 120518,](http://doi.org/10.1016/j.jclepro.2024.141052)  
881 [http://doi.org/10.1016/j.indcrop.2025.120518, 2025.](http://doi.org/10.1016/j.jclepro.2024.141052)

882 Zhu, Z., Ge, T., Luo, Y., Liu, S., Xu, X., Tong, C., and Shibistova, O., Guggenberger,

G., Wu, J.: Microbial stoichiometric flexibility regulates rice straw mineralization and its priming effect in paddy soil, *Soil Biol. Biochem.*, 121, 67–76, <http://doi.org/10.1016/j.soilbio.2018.03.003>, 2018.

Zhou, G., Li, G., Liang, H., Liu, R., Ma, Z., Gao, S., Chang, D., Liu, J., Chadwick, D.R., Jones, D. L., and Cao, W.: Green Manure Coupled With Straw Returning Increases Soil Organic Carbon via Decreased Priming Effect and Enhanced Microbial Carbon Pump, *Glob. Change Biol.*, 31(5), e70232, <http://doi.org/10.1111/gcb.70232>, 2025.

Zou, J., Huang, Y., Qin, Y., Shen, Q., Pan, G., Lu, Y., and Liu, Q.: Changes in fertilizer-induced direct N<sub>2</sub>O emissions from paddy fields during rice-growing season in China between 1950s and 1990s, *Glob. Change Biol.*, 15, 229–242, <http://doi.org/10.1111/j.1365-2486.2008.01775.x>, 2009.

## Tables and Figures

**Table 1.** Initial basic physicochemical properties of the six treatments.

| Type | pH                  | $\text{NH}_4^+-\text{N}$<br>( $\text{mg}\cdot\text{kg}^{-1}$ ) | $\text{NO}_3^--\text{N}$<br>( $\text{mg}\cdot\text{kg}^{-1}$ ) | TN<br>( $\text{g}\cdot\text{kg}^{-1}$ ) | TC<br>( $\text{g}\cdot\text{kg}^{-1}$ ) | SOC<br>( $\text{g}\cdot\text{kg}^{-1}$ ) |
|------|---------------------|----------------------------------------------------------------|----------------------------------------------------------------|-----------------------------------------|-----------------------------------------|------------------------------------------|
| CKT  | $4.25\pm0.06^a$     | $29.67\pm7.50^b$                                               | $5.01\pm2.02^b$                                                | $2.16\pm0.16^{ab}$                      | $22.93\pm2.00^a$                        | $25.50\pm2.65^a$                         |
| HMT  | $4.01\pm0.06^{ab}$  | $37.33\pm4.43^{ab}$                                            | $6.32\pm2.25^b$                                                | $2.01\pm0.09^{ab}$                      | $21.08\pm1.12^a$                        | $22.00\pm1.69^a$                         |
| SMT  | $4.11\pm0.06^{abc}$ | $30.42\pm8.93^b$                                               | $5.10\pm1.88^b$                                                | $1.96\pm0.12^b$                         | $20.47\pm1.12^a$                        | $21.83\pm1.92^a$                         |
| CKG  | $4.16\pm0.02^{ab}$  | $33.20\pm5.90^{ab}$                                            | $8.59\pm1.46^{ab}$                                             | $2.41\pm0.19^{ab}$                      | $25.70\pm1.99^a$                        | $21.68\pm1.82^a$                         |
| HMG  | $3.98\pm0.05^b$     | $37.90\pm7.98^{ab}$                                            | $12.73\pm3.94^a$                                               | $2.70\pm0.35^a$                         | $27.77\pm3.57^a$                        | $27.98\pm3.55^a$                         |
| SMG  | $4.00\pm0.03^b$     | $44.40\pm7.33^a$                                               | $13.36\pm3.82^a$                                               | $2.31\pm0.28^{ab}$                      | $24.92\pm2.86^a$                        | $26.88\pm2.53^a$                         |

\*Data shown are means  $\pm$  SE. Different superscript letters indicate the significant difference ( $p < 0.05$ ). CK for control; SM and HM for intercropping types, T for tea row, G for inter-row.

**Table 12.** Seasonal variation in CO<sub>2</sub> fluxes from tea rows and inter-row zones under different green manure intercropping treatments. ~~Different lowercase letters indicate significant differences among treatments and seasons ( $P < 0.05$ ).~~

| Type | Spring<br>(mg·m <sup>-2</sup> ·min <sup>-1</sup> ) | Summer<br>(mg·m <sup>-2</sup> ·min <sup>-1</sup> ) | Autumn<br>(mg·m <sup>-2</sup> ·min <sup>-1</sup> ) | Winter<br>(mg·m <sup>-2</sup> ·min <sup>-1</sup> ) |
|------|----------------------------------------------------|----------------------------------------------------|----------------------------------------------------|----------------------------------------------------|
| CKT  | 6.46±0.58 <sup>bcd</sup>                           | 9.66±0.49 <sup>a</sup>                             | 9.93±0.68 <sup>a</sup>                             | 3.60±0.36 <sup>f</sup>                             |
| HMT  | 5.65±0.44 <sup>def</sup>                           | 7.97±0.39 <sup>abc</sup>                           | 9.21±0.46 <sup>a</sup>                             | 4.10±0.43 <sup>ef</sup>                            |
| SMT  | 6.05±0.39 <sup>cde</sup>                           | 8.99±0.34 <sup>a</sup>                             | 8.47±0.30 <sup>ab</sup>                            | 3.71±0.37 <sup>f</sup>                             |
| CKG  | 8.83±1.14 <sup>cd</sup>                            | 10.63±0.66 <sup>abc</sup>                          | 9.76±0.83 <sup>ab</sup>                            | 4.03±0.52 <sup>e</sup>                             |
| HMG  | 9.08±0.49 <sup>cd</sup>                            | 13.03±0.29 <sup>a</sup>                            | 9.38±0.39 <sup>bcd</sup>                           | 4.19±0.29 <sup>e</sup>                             |
| SMG  | 10.76±0.43 <sup>ab</sup>                           | 12.69±0.73 <sup>ab</sup>                           | 10.94±0.86 <sup>abc</sup>                          | 6.03±0.84 <sup>de</sup>                            |

~~\*Different superscript~~~~lowercase~~ letters indicate significant differences among treatments and seasons ( $p < 0.05$ ). Data shown are means ± SE. CK for control; SM and HM for intercropping types, T for tea row, G for inter-row.

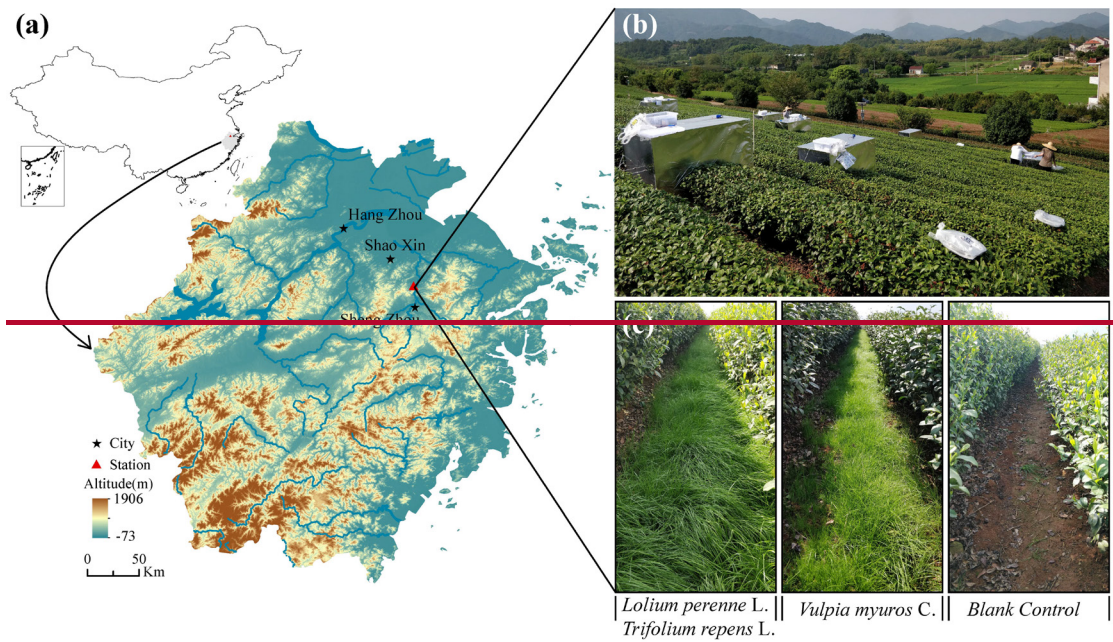

907

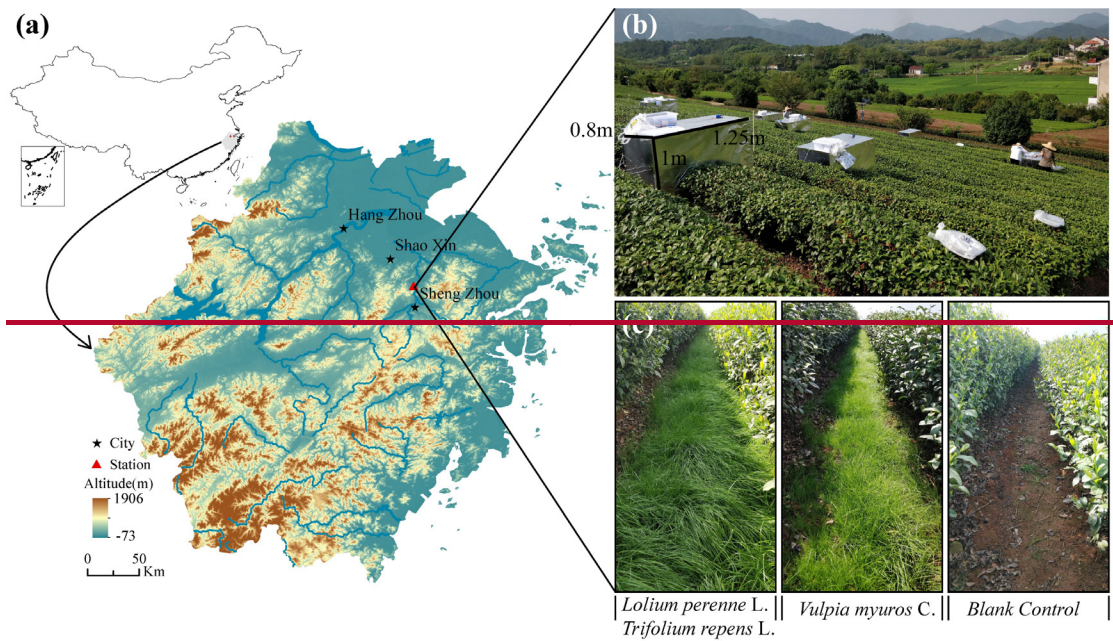

908



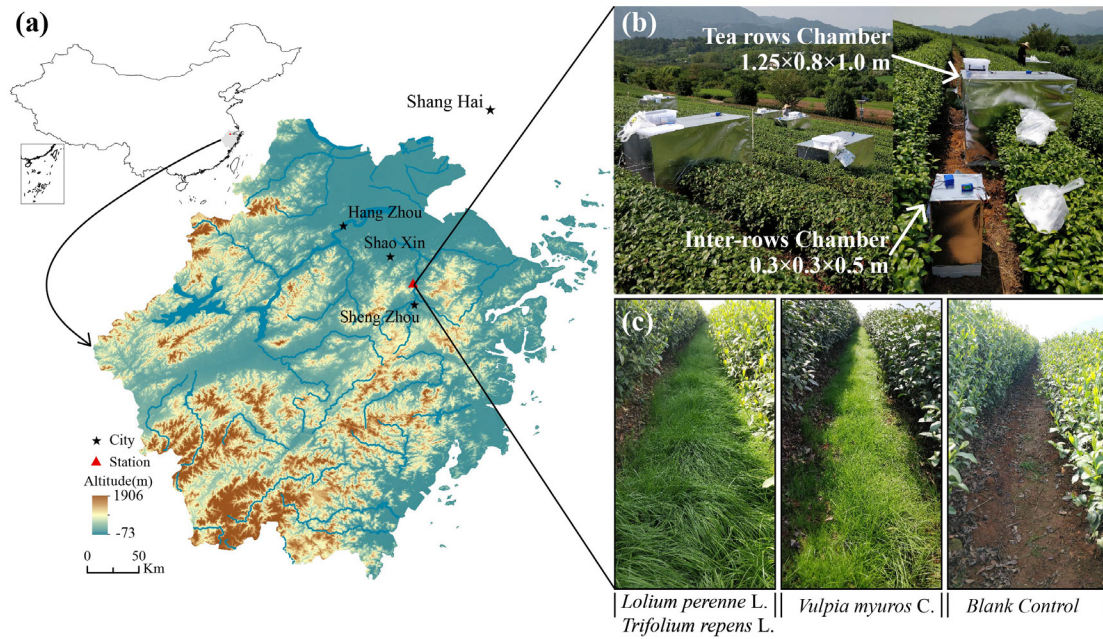

**Figure 1.** (a) Geographic location of the study area in Shengzhou City, Zhejiang Province, China; (b) field layout of the tea plantation experiment; (c) photos of *Lolium perenne* L. and *Trifolium repens* L. plot, and *Vulpia myuros* C. plot, the blank control plot, respectively.

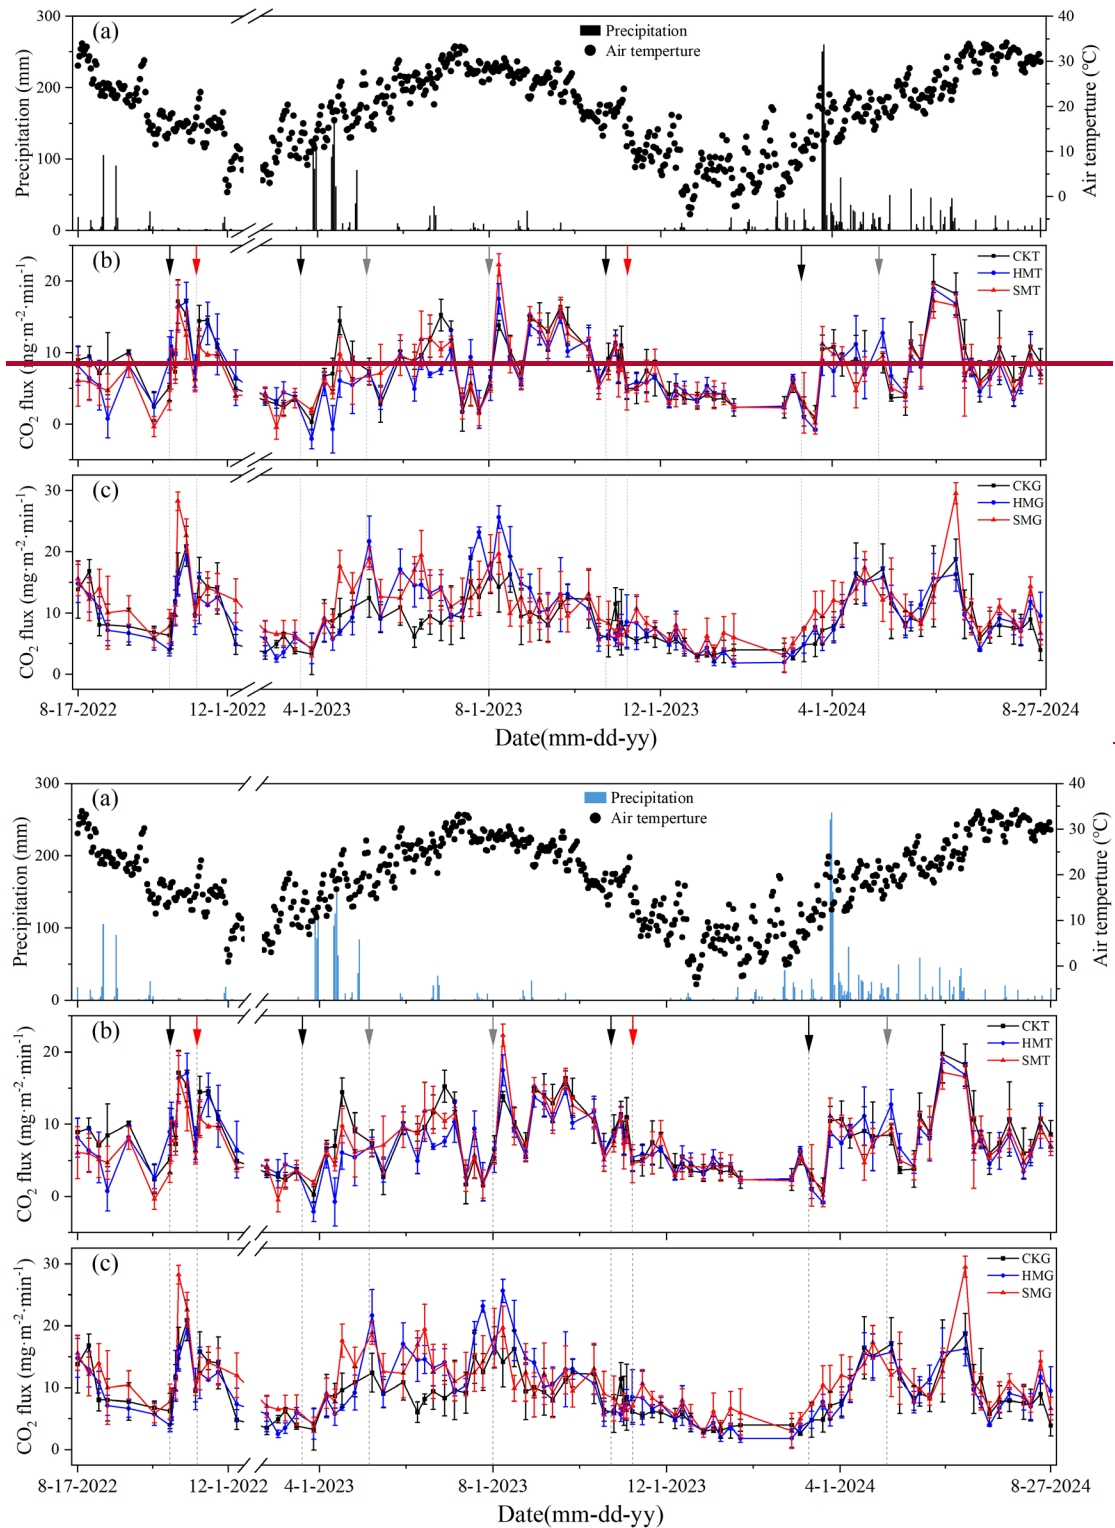

**Figure 2.** Dynamics of (a) air temperature and precipitation, (b) CO<sub>2</sub> fluxes from tea rows, and (c) CO<sub>2</sub> fluxes from inter-rows during the observation period (2022–2024). Black, green and orange arrows represent the timings of fertilization, grass planting and tea pruning, respectively. Flux data are presented as mean ± SE. CK for control; SM

920 and HM for intercropping types, T for tea row, G for inter-row.



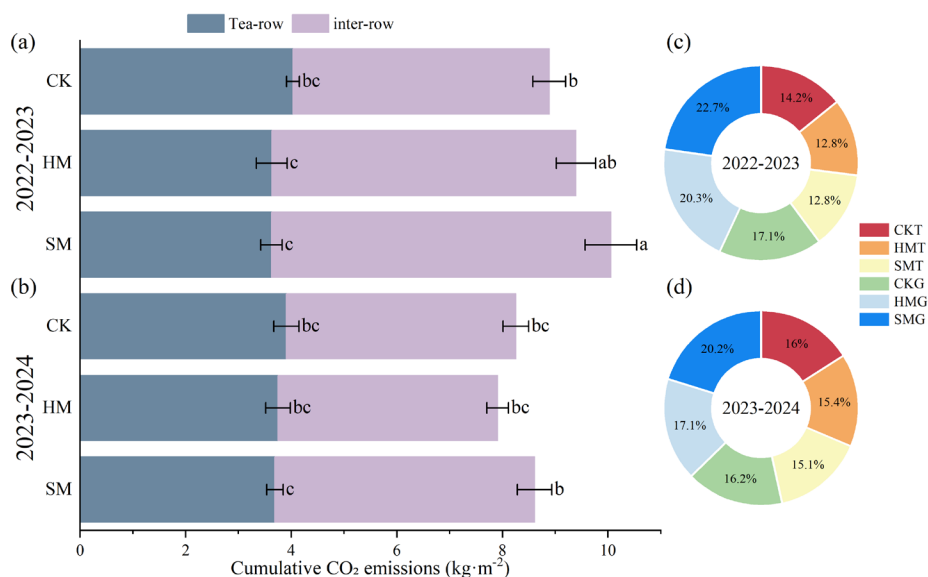

**Figure 3.** (a, b) Annual cumulative CO<sub>2</sub> emissions from tea rows and inter-rows under different green manure intercropping treatments; (c, d) contribution of tea rows and inter-rows to total annual CO<sub>2</sub> emissions under each treatment. Data shown are means  $\pm$  SE. Different superscript letters denote statistically significant differences ( $p < 0.05$ ). CK for control; SM and HM for intercropping types, T for tea row, G for inter-row.

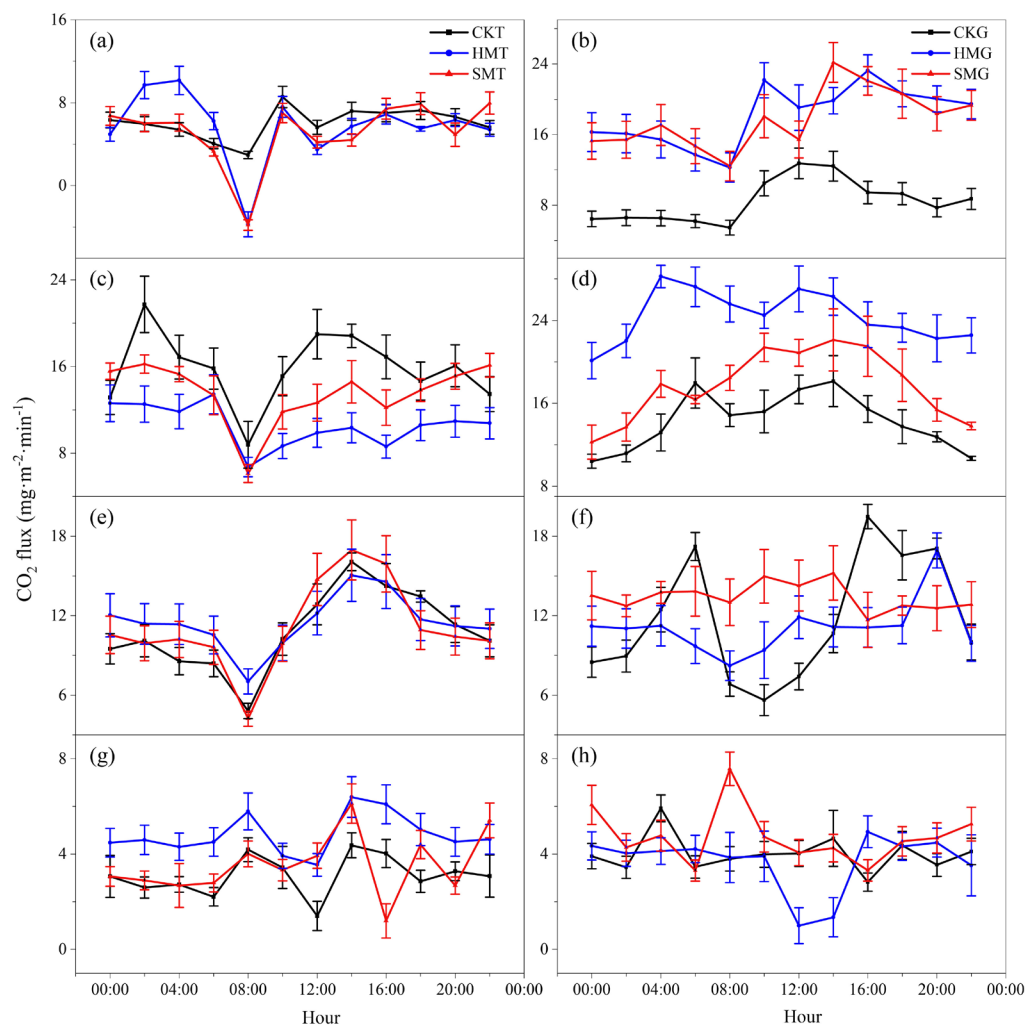

**Figure 4.** Diurnal variation in CO<sub>2</sub> fluxes from (a, c, e, g) tea rows and (b, d, f, h) inter-row zones under different green manure intercropping treatments across seasons: (a–b) spring, (c–d) summer, (e–f) autumn, and (g–h) winter. CK for control; SM and HM for intercropping types, T for tea row, G for inter-row.

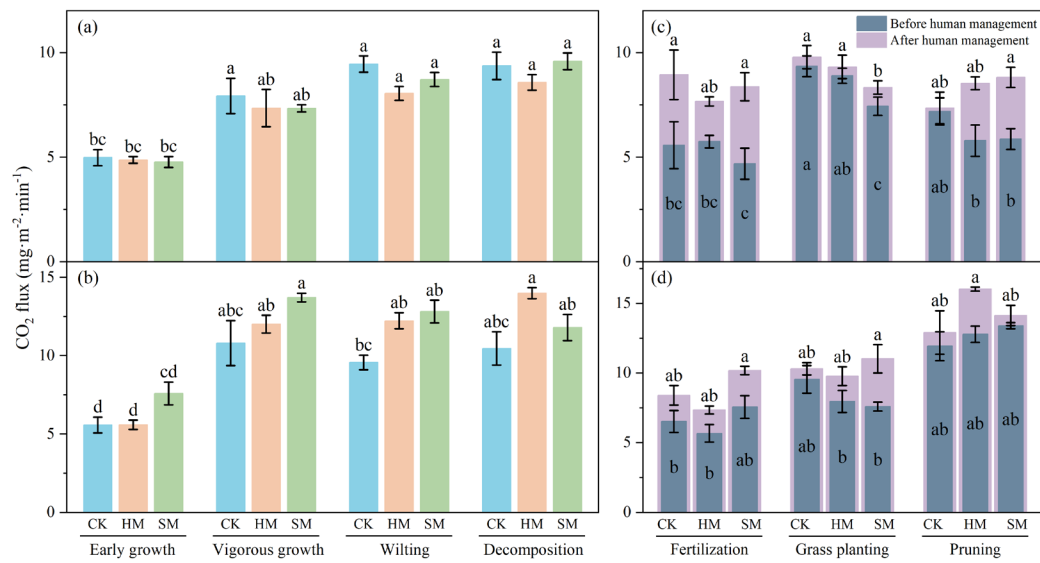

**Figure 5.** Temporal dynamics of CO<sub>2</sub> fluxes under green manure (a, b) growth stages and (c, d) management events in tea plantations. Growth stages include: early growth (mid-November to early April), vigorous growth (mid-April to late May), wilting (early June to late July), and decomposition (August). CK for control; SM and HM for intercropping types, T for tea row, G for inter-row.

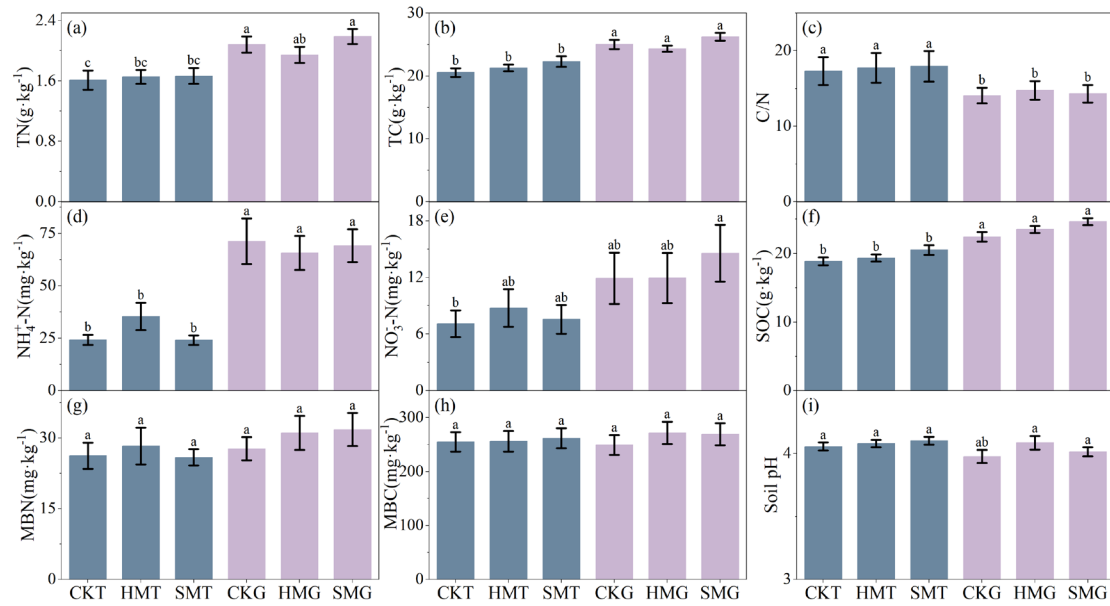

**Figure 6.** Basic physicochemical properties of soil in tea rows and inter-rows under different green manure intercropping treatments. CK for control; SM and HM for intercropping types, T for tea row, G for inter-row.

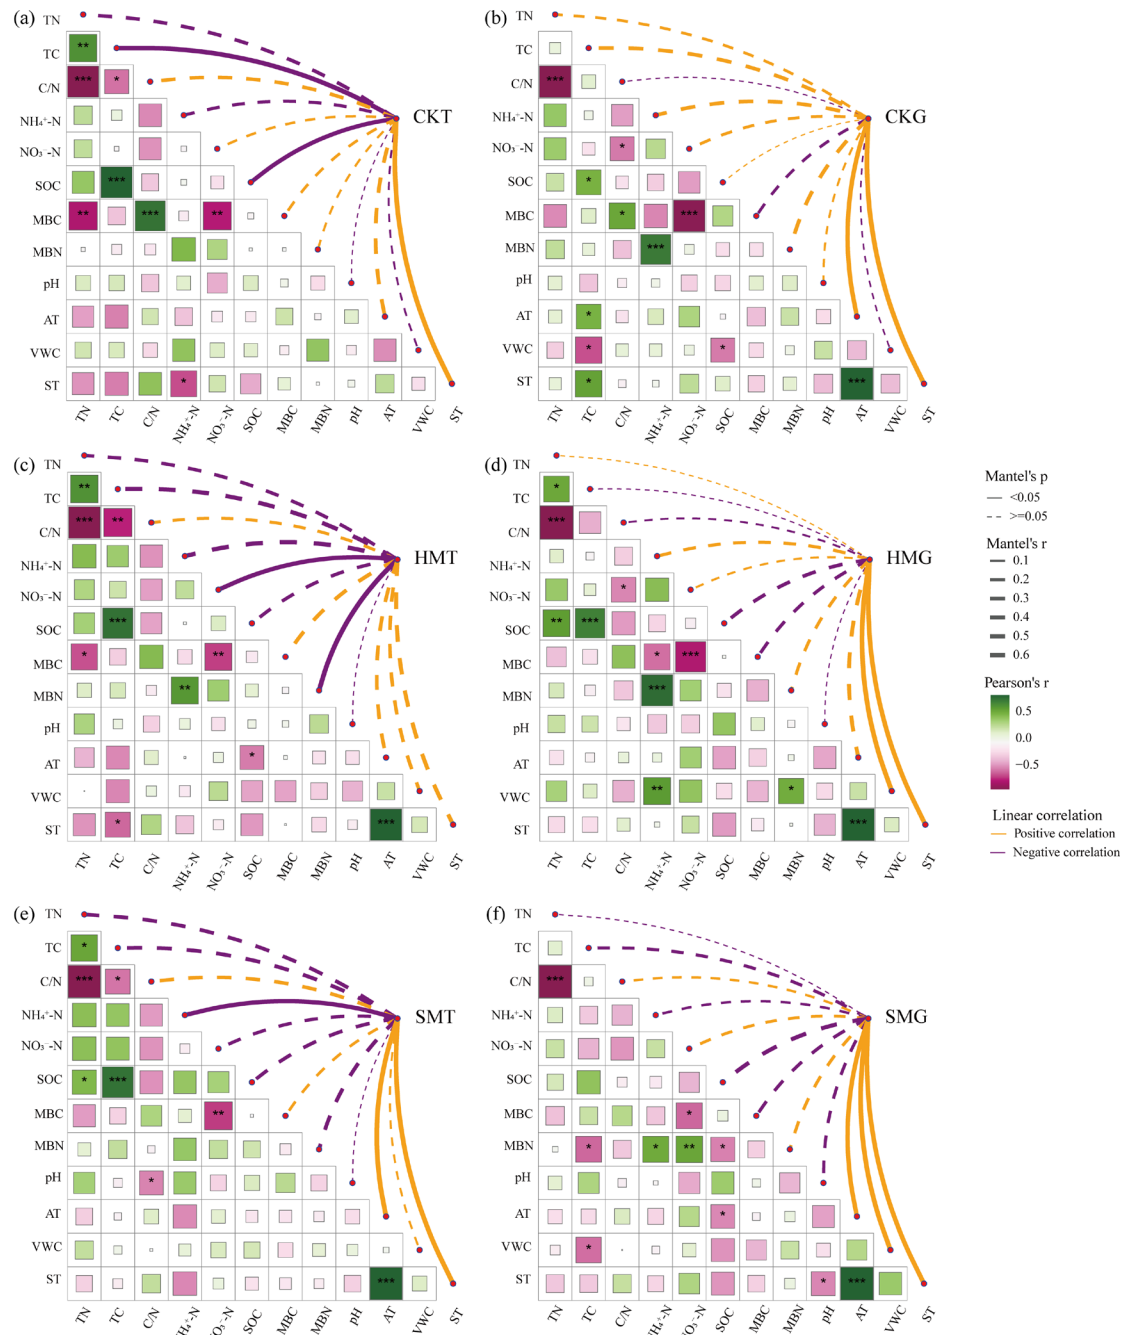

**Figure 7.** Pairwise correlations between environmental factors and their relationships with CO<sub>2</sub> fluxes under different green manure treatments (\* $p < 0.05$ , \*\* $p < 0.01$ , \*\*\* $p < 0.001$ ). CK for control; SM and HM for intercropping types, T for tea row, G for inter-row.

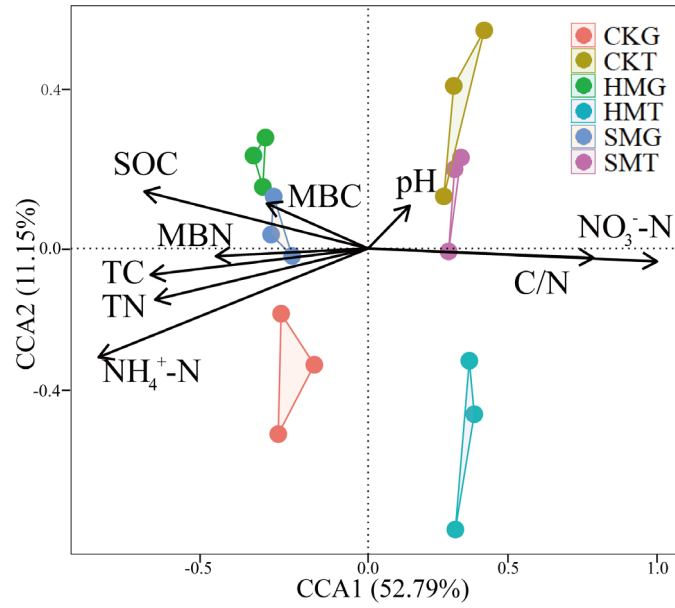

**Figure 8.** Canonical correspondence analysis (CCA) showing the influence of soil physicochemical properties on CO<sub>2</sub> emissions from tea rows and inter-rows under different green manure treatments. CK for control; SM and HM for intercropping types, T for tea row, G for inter-row.

## Appendix 1

The CO<sub>2</sub> flux was calculated using the following equation:

$$F = \rho_0 \times \frac{P}{P_0} \times \frac{T_0}{T+T_0} \times \frac{V}{M} \times \frac{\Delta c}{\Delta t} \quad (1)$$

where F is the CO<sub>2</sub> flux (mg·m<sup>-2</sup>·min<sup>-1</sup>);  $\rho_0$  is the density of CO<sub>2</sub> under standard conditions (1.98 kg·m<sup>-3</sup>);  $P_0$  and  $T_0$  are the standard atmospheric pressure (101.325 kPa) and temperature (273.15 K), respectively; P and T are the atmospheric pressure (kPa) and absolute temperature (K) at the time of sampling; V and M are the volume (m<sup>3</sup>) and bottom area (m<sup>2</sup>) of the chamber, respectively;  $\Delta c/\Delta t$  is the slope of the linear or nonlinear regression of CO<sub>2</sub> concentration over time.

First, the raw CO<sub>2</sub> concentration readings were calibrated with standard gases. Then, linear regression was performed to fit their rate of change over time. Finally, CO<sub>2</sub> flux was calculated using the standard flux formula by incorporating the chamber volume, base area, and the measured atmospheric pressure and temperature.

## Appendix 2

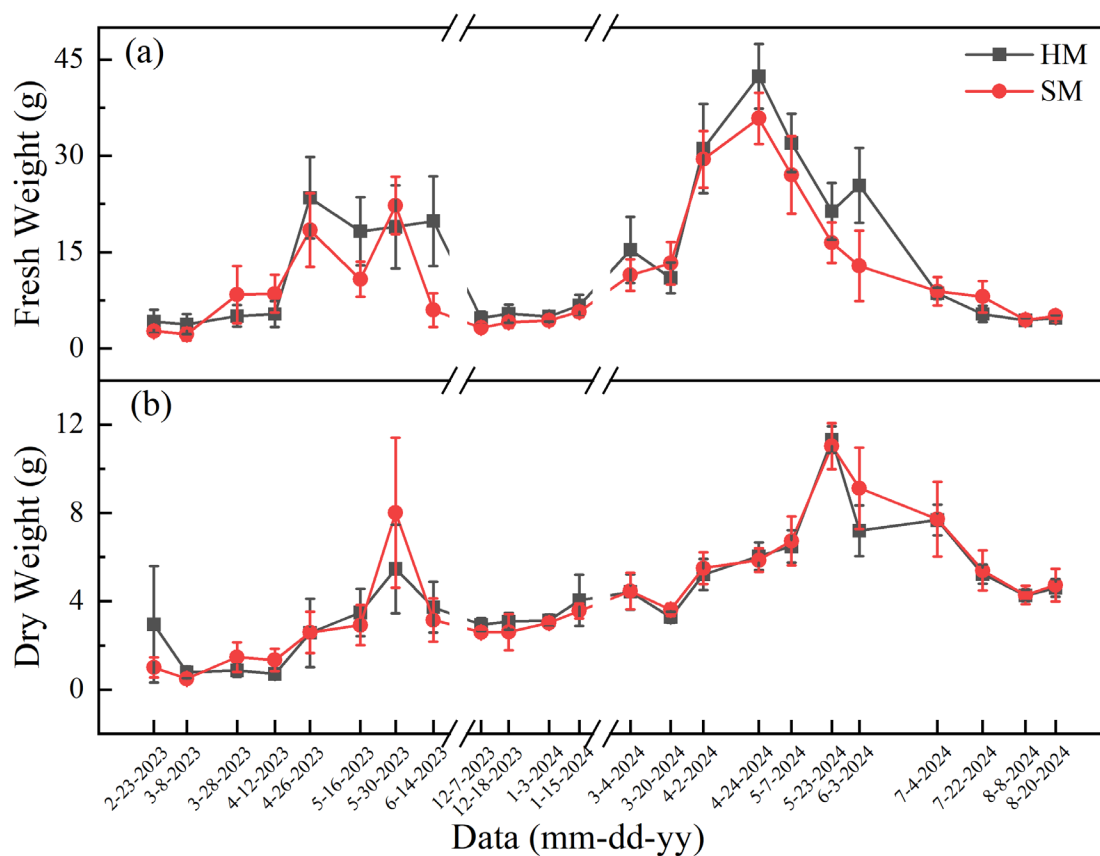

**Figure A1.** Temporal trend of green manure indexes



**Spatially Contrasting CO<sub>2</sub> Dynamics Driven by Green Manure  
Intercropping in Subtropical Tea Plantations**

**Shuo Liu<sup>1,4</sup>, Zeping Jin<sup>1,3</sup>, Ziyi Chen<sup>1,3</sup>, Haolin Li<sup>1,3</sup>, Zihan Fan<sup>3</sup>, Shaohui Li<sup>3</sup>,  
Haiwang Fu<sup>1,4</sup>, Wei He<sup>1</sup>, Kunpeng Zang<sup>1</sup>, Shuangxi Fang<sup>1,5\*</sup>, Peng Yan<sup>2</sup>**

**<sup>1</sup> Zhejiang Carbon Neutral Innovation Institute & Zhejiang International Cooperation Base  
for Science and Technology on Carbon Emission Reduction and Monitoring, Zhejiang  
University of Technology, Hangzhou 310014, China**

**<sup>2</sup> Key Laboratory of Tea Quality and Safety Control, Ministry of Agriculture, Tea Research  
Institute, Chinese Academy of Agricultural Sciences, Hangzhou 310008, China**

**<sup>3</sup> College of Environment, Zhejiang University of Technology, Hangzhou 310014, China**

**<sup>4</sup> Shaoxing Research Institute, Zhejiang University of Technology, Shaoxing 312077, China**

**<sup>5</sup> State Key Laboratory of Green Chemical Synthesis and Conversion, Zhejiang University of  
Technology, Hangzhou 310014, China**

**Correspondence authors:**

**Shuangxi Fang, E-mail: fangsx@zjut.edu.cn**

**Abstract:**

Tea plantations are important contributors to greenhouse gas emissions due to intensive fertilization and continuous cultivation. However, the mechanisms by which green manure intercropping regulates soil CO<sub>2</sub> dynamics in these systems remain poorly understood. We employed the static chamber method over a two-year period, with sampling conducted weekly, to investigate how intercropping with *Vulpia myuros* (SM) and a legume–nonlegume mixture of *Lolium perenne* and *Trifolium repens* (HM) influenced spatial CO<sub>2</sub> flux dynamics compared with a no-intercropping control (CK) from tea rows and inter-row zones in a subtropical tea plantation. Distinct seasonal variations were observed, with CO<sub>2</sub> fluxes peaking in summer and autumn and declining in spring and winter. Average tea-row fluxes were 8.7% and 9.5% lower under SM and HM, respectively, compared to CK, indicating emission reductions with intercropping. In contrast, average inter-row fluxes increased by 19.4% under SM and 7.7% under HM, demonstrating pronounced spatial contrasts. Diurnal patterns generally exhibited midday peaks (12:00–14:00), especially in summer and autumn across all tea-rows, and short-term CO<sub>2</sub> pulses were triggered by field operations such as fertilization and pruning. Notably, HM effectively suppressed fertilization-induced CO<sub>2</sub> pulses, revealing the mitigation potential of legume–nonlegume mixtures. Green manure increased soil organic carbon (6.4%), lowered soil temperature (4.5%), and enhanced porosity (4.2%), collectively shaping CO<sub>2</sub> dynamics. Multivariate analysis identified soil organic carbon (SOC) and temperature as dominant flux drivers, and a potential SOC threshold was detected, beyond which CO<sub>2</sub> emissions accelerated. Compared to CK, intercropping reduced tea-row emissions by 7.1–7.9% but increased inter-row emissions by 12.7–28.9% based on the two years cumulative emissions, continuous intercropping significantly decreased overall inter-row emissions over time. These results highlight the spatially heterogeneous nature of carbon flux regulation and demonstrate the long-term potential of green manure intercropping as a climate-smart management strategy in perennial agroecosystems.

**Keywords:** tea plantations, green manure, CO<sub>2</sub> emissions, soil factors

## 1 Introduction

Mitigating greenhouse gas (GHG) emissions to address global warming and associated climate challenges remains a priority in global environmental research. Among long-lived GHGs, carbon dioxide (CO<sub>2</sub>) plays the most prominent role, contributing approximately 66% to the increase in global radiative forcing (IPCC, 2022). In 2023, the global average atmospheric CO<sub>2</sub> concentration reached  $420.0 \pm 0.1$  ppm, representing a 151% increase compared to pre-industrial levels (prior to 1750) (WMO, 2024). Agriculture is a major emission sector, accounting for about 14% of total anthropogenic CO<sub>2</sub> emissions (Wang et al., 2025). In China, this share is even higher, with agricultural activities accounting for up to 17% of national CO<sub>2</sub> emissions (Xu and Lin, 2017). Therefore, accurately characterizing CO<sub>2</sub> emission dynamics in agricultural systems and scientifically informed mitigation strategies are critical for advancing global GHG reduction efforts and promoting sustainable, low-carbon agricultural development (Xu et al., 2024).

Tea (*Camellia sinensis* L.) is an important economic crop in tropical and subtropical regions. Over recent decades, global tea cultivation area has expanded rapidly, reaching 4.70 million hectares in 2022. China has led the most significant growth, with 3.35 million hectares of tea plantations and an annual production of 2.82 million tons, ranking first worldwide in both area and output (FAO, 2024). To maximize yield and improve tea quality, fertilizer inputs to tea cultivation area can be up to four times higher than those applied to staple crops during a single growing season (Zou et al., 2009; Han et al., 2013; Yao et al., 2015). In China, average annual fertilizer use in tea plantations reaches 678 kg ha<sup>-1</sup>, with more than 30% of plantations experiencing over-application (Ni et al., 2019). Such intensive fertilization not only accelerates soil acidification but also significantly increases GHGs emissions from tea plantations (Liu et al., 2016; Yan et al., 2020). However, most existing studies on agricultural CO<sub>2</sub> emissions have focused on staple cropping systems such as wheat (Song et al., 2024), rice (Qian et al., 2023), and maize (Zhang et al., 2020), while studies on CO<sub>2</sub> emissions from tea plantations remain limited.

For instance, Lang et al. (2017) reported that intercropping rubber trees with tea

in the tropical forests of Xishuangbanna, China, reduced CO<sub>2</sub> emissions, although it simultaneously weakened the soil's methane (CH<sub>4</sub>) uptake capacity. Wanyama et al. (2019) found that converting tropical montane forests into tea plantations in Africa decreased annual soil CO<sub>2</sub> emissions to 5.6 t ha<sup>-1</sup>, with emissions positively correlated with soil pH and negatively correlated with the soil C/N ratio. Pang et al. (2019) quantitatively assessed the net ecosystem exchange (NEE) of tea plantations in southeastern China from 2014 to 2017, reporting values ranging from -182.40 to -301.51 g C m<sup>-2</sup>, indicating that tea plantations act as net carbon sinks. However, their carbon sequestration potential was lower than that of other subtropical ecosystems, with temperature identified as the primary factor influencing ecosystem respiration. These findings suggest that CO<sub>2</sub> emissions from tea plantations play a non-negligible role on the carbon exchange between atmosphere and tea plantations. However, the limited number of studies has led to substantial uncertainty on estimating tea plantation CO<sub>2</sub> emissions, restricting our understanding of their contribution to regional and global agricultural GHG budgets (Li et al., 2016; Ji et al., 2020) and hindering the development of low-carbon tea plantations.

In response, there is a growing emphasis on the development of eco-friendly and low-carbon tea plantations (Wang et al., 2022). Toward reduction of fertilizer usage and higher economic efficiency, various management practices were incorporated, including by using green manure. As a modernized agricultural practice, green manure has been widely adopted in farming systems and serves as an important measure for improving soil quality, playing a vital role in sustainable agriculture. Within the context of GHGs mitigation, green manure is recognized as an effective solution for improving soil quality and enhancing CO<sub>2</sub> sequestration in agroecosystems (Forte et al., 2017). However, most studies examining the relationship between green manure and carbon emissions have focused on conventional croplands such as rice and wheat. Comprehensive studies have shown that appropriate green manure management can significantly reduce the global warming potential (GWP) associated with fertilization (Zhang et al., 2024). For instance, Gong et al. (2021) demonstrated that long-term ryegrass cover in organic soybean fields effectively reduced net GWP. In contrast, other

studies have reported that green manure application may increase CO<sub>2</sub> emissions. Kim et al. (2013) found that the application of Chinese milk vetch and ryegrass increased winter CO<sub>2</sub> fluxes in paddy fields by approximately 197% and 266%, respectively. Large-scale assessments have further revealed that green manure tends to increase CO<sub>2</sub> emissions, primarily due to differences in plant species and biomass inputs. Biomass alone explained 63% of the variation in CO<sub>2</sub> emission increases, with emissions declining as the C/N ratio of cover crop biomass increased. Notably, mixed sowing of leguminous and non-leguminous green manures has been shown to improve residue C/N ratios and reduce GHGs emissions (Muhammad et al., 2019).

Existing studies on GHG mitigation in tea systems have predominantly focused on fertilizer reduction and substitution strategies. Wu et al. (2018) conducted a three-year fertilization control experiment in southern China and found that halving nitrogen input decreased nitrous oxide (N<sub>2</sub>O) emissions by 44.5% in tea plantations. In contrast, Yao et al. (2015) reported that organic fertilizer application led to a 71% increase in N<sub>2</sub>O emissions compared to conventional urea, suggesting potential trade-offs in GHG outcomes. Organic amendments, such as compost or manure, have been shown to improve soil fertility, enhance soil structure, porosity, and pH, and promote carbon sequestration in tea plantation soils (Han et al., 2013; Wu et al., 2021). Biochar application has also been identified as an effective strategy for improving soil quality while simultaneously enhancing soil carbon storage and reducing emissions (Wu et al., 2021). The effect of green manure intercropping on tea plantations was mainly focused on improvements in tea plant growth and soil nutrient dynamics. For example, intercropping with green manure species has been shown to enhance nitrogen use efficiency and increase soil microbial diversity (Huang et al., 2023). The potential role of green manure intercropping in mitigating GHGs emissions in tea ecosystems remains poorly understood, and its interactions with key environmental factors have not been fully clarified (Zhu et al., 2018). Green manure may influence CO<sub>2</sub> emissions by altering carbon input levels and inducing soil disturbances, but the specific emission characteristics and driving factors require further investigation.

To address these gaps, this study selected cultivated tea plantations region located

in the east of China, where is recognized as a very important tea cultivation area famous by the tea name of Longjing. Commonly used green manure species in tea systems (*Vulpia myuros* C., *Lolium perenne* L., and *Trifolium repens* L.) were selected for intercropping, covering both leguminous and non-leguminous species, under monoculture and mixed-sowing configurations. CO<sub>2</sub> flux were carried out in both tea rows and inter-row zones across different intercropping treatments. Dynamics and key influencing factors of CO<sub>2</sub> emissions under various green manure intercropping models were analyzed, aiming to reveal the potential reasons by which green manure intercropping regulates carbon fluxes in tea plantations and provide support for the development of low-carbon tea plantations and sustainable regional agriculture.

## **2 Methodology**

### **2.1 Monitoring Site**

This study was conducted at the Comprehensive Experimental Tea Plantation Base of the Tea Research Institute, Chinese Academy of Agricultural Sciences, located in Shengzhou, Zhejiang Province, China (120°83'E, 29°75'N; elevation 30 m a.s.l.) (Fig. 1a). The site is situated in a low mountainous and hilly region of southeastern China and is characterized by a subtropical monsoon climate. During the experimental period (August 2022 to August 2024), the average annual temperature was approximately 16 °C, with an average annual precipitation of about 1400 mm. The region experiences a concentrated rainy season from April to June and has a frost-free period of around 240 days. The tea cultivated at the site is *Jinmudan*, an elite cultivar derived from the hybridization of *Tieguanyin* and *Huangdan*, and is widely planted across China. The tea plantation was established in 2015; the tea plants are 8–10 years old and arranged in a single-row planting pattern with a row spacing of 150 cm and a plant spacing of 40 cm. The soil type of the tea plantation is classified as red soil (Ultisol), a typical soil type in this region, and the initial basic physicochemical properties of the six treatment soils are shown in Table 1.

## 2.2 Experimental Setup

Three green manure intercropping treatments were established in this study: *Vulpia myuros* C. (SM), a mixture of *Lolium perenne* L. and *Trifolium repens* L. (HM), and a control treatment without intercropping (CK). The experimental tea plantation covered an area of approximately 1000 m<sup>2</sup>. For each treatment, three representative tea rows were selected as three replicates. Adjacent treatments were separated by two tea rows (~3 m), and replicate areas within the same treatment were spaced approximately 5 m apart. Gas fluxes were measured in both tea rows (T) and inter-row zones (G), resulting in six treatments: SMT, SMG, HMT, HMG, CKT, and CKG, with a total of 18 representative sampling points (Fig. 1b, c). Tea plantation followed standard management practices, including fertilization, pruning, and tillage. Basal fertilization and tillage were conducted in middle of October, followed by green manure sowing in early November. Urea was applied as a topdressing in early February. Tea leaves were harvested in end of March, and pruning was normally conducted in May and July.

Gas sampling was performed using the static chamber–gas chromatography method. The dimensions of the static chambers were 1.25 × 0.8 × 1.0 m for tea rows and 0.3 × 0.3 × 0.5 m for inter-row zones (Fig. 1b). Each chamber was equipped with an internal fan to ensure uniform gas mixing. To avoid rapid heating due to sunlight, the chambers were wrapped with aluminum foil and sponge, functioning as dark chambers. To minimize disturbance, chamber bases with water grooves were installed one month in advance at each sampling point, inserted 15 cm into the soil. During sampling, water was added to the grooves, and the chamber was securely sealed onto the base to create a closed environment. Four gas samples were collected at 7-minute intervals using gas sampling bags.

For seasonal monitoring, sampling was conducted once per week between 09:00 and 11:00 a.m. (local time). Intensive sampling was also carried out following key management events such as fertilization and pruning. Diurnal variation was monitored over three consecutive days in January, April, July, and October, representing winter, spring, summer, and autumn, respectively. During these campaigns, gas samples were collected every 2 hours over a 24-hour period. All gas samples were analyzed within

24 hours by using a gas chromatograph (Agilent 7890B, Agilent Inc., USA). CO<sub>2</sub> concentrations were measured using a flame ionization detector (FID) at a working temperature of 175 °C. High-purity nitrogen was used as the carrier gas, with an injection volume of 30 mL and a flow rate of 250 mL·min<sup>-1</sup>. During the tests, the deviation between the calculated regression values of CO<sub>2</sub> and the nominal mole fractions was 0.37 μmol mol<sup>-1</sup>. The linear fit between the instrument response values and the nominal mole fractions achieved a correlation coefficient (R<sup>2</sup>) of 0.9999. Furthermore, the standard gases used were calibrated in multiple rounds by the Greenhouse Gas Laboratory of the Atmospheric Observation Center of the China Meteorological Administration using primary standard gases, ensuring traceability to the World Meteorological Organization primary standards.

Meteorological data, including precipitation, atmospheric pressure, and air temperature (AT), were obtained from an automatic weather station installed within the tea plantation. Soil samples were recorded using an automatic weather station installed within the tea plantation. Soil samples were collected monthly using a five-point composite method within a 1 m radius of each sampling point. After passing through a 2 mm sieve, the samples were divided into three portions:

- i. One fresh portion was analyzed for microbial biomass carbon (MBC) and microbial biomass nitrogen (MBN) using the chloroform fumigation-extraction method and a TOC analyzer.
- ii. A second portion was air-dried and ground for analysis of soil pH.
- iii. The third portion was stored at 4 °C for analysis of nitrate nitrogen (NO<sub>3</sub><sup>-</sup>-N) and ammonium nitrogen (NH<sub>4</sub><sup>+</sup>-N) by spectrophotometry, total carbon (TC) and total nitrogen (TN) by elemental analysis, and soil organic carbon (SOC) by the dichromate oxidation–spectrophotometry method.

Soil temperature (ST) and volumetric water content (VWC) were measured *in-situ* using a portable soil sensor (TDR-315H, Acclima). Soil bulk density (BD) and water-filled pore space (WFPS) were determined using the core ring method.



## 2.3 Data Processing

The flux refers to the amount of gas exchanged per unit time and unit area. A positive value indicates net emission to the atmosphere, while a negative value indicates net uptake from the atmosphere (Yao et al., 2015; Zhang et al., 2020). Based on the flux measurements, cumulative CO<sub>2</sub> emissions under different green manure intercropping treatments were also estimated. All data analyses and visualizations were performed using R software. Two-way analysis of variance (Two-way ANOVA) was employed to assess the effects of treatment type and observation period on CO<sub>2</sub> fluxes and soil physicochemical properties. Spearman correlation analysis and Mantel tests were used to examine the relationships between CO<sub>2</sub> flux and environmental variables under different green manure intercropping treatments. Canonical correspondence analysis (CCA) was applied to comprehensively evaluate the influence of soil physicochemical properties on CO<sub>2</sub> emissions. Data shown are means  $\pm$  standard error (SE). In all statistical tests, the level of significant differences and correlations was set at  $p < 0.05$ .

## 3 Results

### 3.1 Long-term Variation of CO<sub>2</sub> Fluxes under Green Manure Intercropping

Figure 2 illustrates the long-term trends of key environmental variables and CO<sub>2</sub> fluxes in the tea plantation throughout the observation period. Overall, CO<sub>2</sub> fluxes from both tea-row and inter-row zones displayed distinct seasonal patterns: higher in summer and autumn, and lower in spring and winter. The seasonal differences between the warm (summer and autumn) and cool (spring and winter) periods were statistically significant (Table 2). The temporal dynamics of CO<sub>2</sub> fluxes closely tracked the trends in air temperature (Fig. 2a), suggesting that temperature is a key driver of soil respiration in tea plantations. Annual fluctuations in CO<sub>2</sub> fluxes were also strongly influenced by field management activities. For example, a sharp increase in CO<sub>2</sub> emissions was observed following basal fertilization in October, and another rise occurred in March of the following year after topdressing and with the onset of warmer temperatures, ultimately peaking in summer (Fig. 2b-c). The effects of management activities are further detailed in Section 3.3.

In tea rows, the annual mean CO<sub>2</sub> fluxes under HMT and SMT treatments were 7.35 ± 0.44 mg·m<sup>-2</sup>·min<sup>-1</sup> and 7.41 ± 0.45 mg·m<sup>-2</sup>·min<sup>-1</sup>, respectively, both lower than that of the control (CKT: 8.12 ± 0.46 mg·m<sup>-2</sup>·min<sup>-1</sup>) (Fig. 2b). In contrast, in inter-row zones, the annual mean CO<sub>2</sub> fluxes were significantly higher under HMG (9.77 ± 0.54 mg·m<sup>-2</sup>·min<sup>-1</sup>) and SMG (10.83 ± 0.52 mg·m<sup>-2</sup>·min<sup>-1</sup>) compared to the control (CKG: 9.07 ± 0.44 mg·m<sup>-2</sup>·min<sup>-1</sup>) ( $p < 0.05$ ) (Fig. 2c). Across seasons, CKT generally exhibited higher CO<sub>2</sub> fluxes than HMT and SMT, except during winter. In the inter-row zones, both HMG and SMG showed significantly higher fluxes than CKG in summer, while SMG consistently had significantly higher CO<sub>2</sub> emissions than both CKG and HMG during the remaining seasons ( $p < 0.05$ ) (Table 2).

Overall, green manure intercropping significantly increased CO<sub>2</sub> emissions from inter-rows, but reduced emissions in tea rows. In terms of cumulative annual emissions, HMT and SMT resulted in 3.69 kg·m<sup>-2</sup> and 3.66 kg·m<sup>-2</sup> of CO<sub>2</sub> emissions, respectively, both lower than the 3.97 kg·m<sup>-2</sup> under CKT (Fig. 3). Similarly, cumulative CO<sub>2</sub> emissions under HMG and SMG remained consistently higher than under CKG, but they declined from 5.76 kg·m<sup>-2</sup> and 6.43 kg·m<sup>-2</sup> in the first year to 4.16 kg·m<sup>-2</sup> and 4.92 kg·m<sup>-2</sup> in the second year, respectively (Fig. 3). Two consecutive years of green manure intercropping led to a gradual reduction in CO<sub>2</sub> emissions from inter-rows, indicating its potential role in long-term emission mitigation in tea plantations. CO<sub>2</sub> emissions from inter-rows were substantially higher than those from tea rows. Compared with the control, HM and SM intercropping increased inter-row cumulative CO<sub>2</sub> emissions by 12.7% and 28.9%, respectively, while reducing tea-row emissions by 7.1% and 7.9% (Fig. 3a-b). Inter-row zones accounted for 52.6%, 57.3%, and 60.8% of the total annual CO<sub>2</sub> emissions in the CK, HM, and SM treatments, respectively (Fig. 3c-d), indicating that the inter-row emissions cannot be ignored.

### 3.2 Diurnal CO<sub>2</sub> Variations

CO<sub>2</sub> fluxes in the tea plantation exhibited pronounced diurnal variations across all seasons, particularly in spring and summer (Fig. 4), likely influenced by the growth stages of green manure species. In spring, CO<sub>2</sub> fluxes in tea rows under all treatments

showed a similar diurnal trend: an initial decline followed by a rapid increase. HMT and SMT reached their minimum fluxes at 08:00 (local time), with values of  $-3.74 \text{ mg}\cdot\text{m}^{-2}\cdot\text{min}^{-1}$  and  $-3.80 \text{ mg}\cdot\text{m}^{-2}\cdot\text{min}^{-1}$ , respectively, then rose sharply and stabilized in the afternoon. The diurnal amplitudes under HMT and SMT were notably greater than that of the control (CKT) (Fig. 4a). In the inter-row zones, the diurnal patterns under green manure treatments differed notably from the control (Fig. 4b). CKG displayed a unimodal pattern with a peak at 12:00 ( $12.74 \text{ mg}\cdot\text{m}^{-2}\cdot\text{min}^{-1}$ ) and a trough at 08:00 ( $5.45 \text{ mg}\cdot\text{m}^{-2}\cdot\text{min}^{-1}$ ), resulting in an amplitude of  $7.29 \text{ mg}\cdot\text{m}^{-2}\cdot\text{min}^{-1}$ . In contrast, HMG and SMG exhibited later peaks at 16:00 ( $23.26 \text{ mg}\cdot\text{m}^{-2}\cdot\text{min}^{-1}$ ) and 14:00 ( $24.17 \text{ mg}\cdot\text{m}^{-2}\cdot\text{min}^{-1}$ ), respectively, with troughs also at 08:00 (HMG:  $12.28 \text{ mg}\cdot\text{m}^{-2}\cdot\text{min}^{-1}$ ; SMG:  $12.43 \text{ mg}\cdot\text{m}^{-2}\cdot\text{min}^{-1}$ ). Both treatments showed substantially higher amplitudes than CKG.

Summer exhibited the most pronounced diurnal variation of  $\text{CO}_2$  fluxes across all seasons. In tea rows, CKT, HMT, and SMT followed a bimodal pattern, with peaks at 02:00 and 12:00, and a trough at 08:00. Their respective diurnal amplitudes were 12.96, 6.70, and  $10.10 \text{ mg}\cdot\text{m}^{-2}\cdot\text{min}^{-1}$  (Fig. 4c). In the inter-rows, the amplitudes were relatively lower, 7.72, 8.12, and  $7.79 \text{ mg}\cdot\text{m}^{-2}\cdot\text{min}^{-1}$  for CKG, HMG, and SMG, respectively, indicating smaller fluctuations compared to tea rows (Fig. 4d). Notably, summer also showed the most distinct contrast between tea rows and inter-rows: CKT recorded the highest average flux in the tea rows, while CKG had the lowest in the inter-rows.

In autumn, tea-row fluxes under all treatments exhibited a unimodal pattern, with minima at 08:00 and peaks at 14:00. The diurnal amplitudes were 11.27, 8.02, and  $12.75 \text{ mg}\cdot\text{m}^{-2}\cdot\text{min}^{-1}$  for CKT, HMT, and SMT, respectively (Fig. 4e). In the inter-rows, HMG and SMG displayed relatively stable diurnal trends, whereas CKG showed a bimodal pattern with peaks at 06:00 and 16:00, and a greater amplitude than both HMG and SMG (Fig. 4f).

In winter,  $\text{CO}_2$  fluxes showed the most stable diurnal variation of the year. In tea rows, amplitudes were only 2.96, 2.84, and  $4.92 \text{ mg}\cdot\text{m}^{-2}\cdot\text{min}^{-1}$  for CKT, HMT, and SMT, respectively (Fig. 4g). Unlike other seasons, 08:00 no longer corresponded to the

daily minimum but rather to a relative maximum, with daily peaks generally occurring at 14:00. In inter-rows, diurnal patterns were less defined. SMG exhibited the highest flux at 08:00 ( $7.57 \text{ mg}\cdot\text{m}^{-2}\cdot\text{min}^{-1}$ ), while HMG showed the lowest at 14:00 ( $0.99 \text{ mg}\cdot\text{m}^{-2}\cdot\text{min}^{-1}$ ) (Fig. 4h).

### 3.3 Effect of Human Management on CO<sub>2</sub> Fluxes

CO<sub>2</sub> fluxes from the tea field varied significantly across different growth stages of green manure, exhibiting a general increasing trend from the early growth stage to the vigorous, wilting, and decomposition stages (Fig. 5a). In the tea rows, the lowest fluxes were observed during the early growth stage, while the highest occurred during the decomposition stage. Differences among the three treatments (CKT, HMT, and SMT) were minimal during the early growth but became more apparent in the subsequent stages. Notably, during the vigorous stage, both HMT and SMT treatments reduced CO<sub>2</sub> emissions compared to CKT. In contrast, the impact of green manure growth on CO<sub>2</sub> fluxes was more pronounced in the inter-row zones (Fig. 5b). At all growth stages, CO<sub>2</sub> fluxes under the HMG and SMG treatments were significantly higher than those under CKG, with the largest differences observed during the wilting stage. Peak emissions occurred during the decomposition stage for HMG and during the wilting stage for SMG.

Fertilization substantially increased CO<sub>2</sub> emissions across the tea plantation (Fig. 5c-d). In tea rows, the post-fertilization increase in CO<sub>2</sub> flux under HMT was 43.1% lower than that under CKT, whereas SMT showed a 9.2% higher increase. In the inter-row zones, HMG reduced the fertilization-induced increase by 10.4% compared to CKG, while SMG amplified it by 40.1%. These findings indicate that the HM treatment can effectively mitigate CO<sub>2</sub> emissions triggered by fertilization, while SM treatment may intensify them, revealing the potential of legume-based mixed green manure to reduce CO<sub>2</sub> emissions in tea plantations. It is worth noting that the mitigation effect in the inter-row zones was weaker than in the tea rows, possibly due to differences in root distribution or organic matter inputs.

The effects of grass planting and tea pruning on CO<sub>2</sub> fluxes varied by treatment

type and location (tea row or inter-row) (Fig. 5c-d). In the CK treatment, grass planting had no significant impact on CO<sub>2</sub> fluxes. However, the HM treatment led to a marked increase after grass planting, with inter-row fluxes rising by 1.81 mg·m<sup>-2</sup>·min<sup>-1</sup>. Similarly, the SM treatment showed significant increases in both zones, with an increase of 0.90 mg·m<sup>-2</sup>·min<sup>-1</sup> in tea rows and an inter-row increase that was 3.8 times greater. These increases can be attribute to soil disturbance during sowing.

After tea pruning, no significant changes in CO<sub>2</sub> flux were observed in the CK treatment. However, both HMT and SMT significantly increased CO<sub>2</sub> emissions in tea row, with increments of 2.74 mg·m<sup>-2</sup>·min<sup>-1</sup> and 2.94 mg·m<sup>-2</sup>·min<sup>-1</sup>, respectively. In the inter-row zones, only the HMG treatment exhibited a significant post-pruning increase of 3.25 mg·m<sup>-2</sup>·min<sup>-1</sup>. These increases may be attributed to pruning residues covering the green manure surface, which could elevate soil temperature and moisture, thereby enhancing soil respiration and CO<sub>2</sub> emissions.

### 3.4 Effects of Environmental Factors on CO<sub>2</sub> Fluxes

Significant differences in soil nutrient parameters were observed between tea rows and inter-row zones under various green manure intercropping treatments (Fig. 6). Green manure treatments generally increased soil total carbon (TC) and total nitrogen (TN), with consistently higher TC and TN levels in the inter-row zones than in the tea rows (Fig. 6a-b), resulting in significantly higher C/N ratios in the tea rows (Fig. 6c). Soil ammonium nitrogen (NH<sub>4</sub><sup>+</sup>-N) and nitrate nitrogen (NO<sub>3</sub><sup>-</sup>-N) concentrations were also significantly greater in the inter-row zones, with the highest NH<sub>4</sub><sup>+</sup>-N found in CKG (71.20 mg·kg<sup>-1</sup>) and the highest NO<sub>3</sub><sup>-</sup>-N in SMG (14.56 mg·kg<sup>-1</sup>). All green manure treatments significantly increased soil organic carbon (SOC), the average SOC contents under HM and SM were 3.6% and 9.3% higher than under CK, respectively (Fig. 6f). Microbial biomass carbon (MBC) and microbial biomass nitrogen (MBN) showed no significant differences between tea rows and inter-row zones, but both were slightly elevated under green manure treatments (Fig. 6g-h). Soil pH ranged from 3.6 to 4.5, with no significant differences among treatments, although green manure application slightly increased soil pH (Fig. 6i).

During the monitoring, soil temperature ranged from 2.3–41.8°C in CK, 3.0–37.6°C in HM, and 3.5–36.6°C in SM. Average soil temperatures in HM and SM were 4.5% and 3.9% lower than in CK, indicating a cooling effect of green manure. Additionally, bulk density was reduced by 8.9% and 5.0% in HM and SM compared to CK, while total porosity increased by 5.3% and 3.0%, and WFPS decreased by 29.1% and 11.1%, respectively. These results suggest that green manure intercropping effectively reduces soil compaction and improves soil aeration. The combined effect of these factors is the key to the changes in CO<sub>2</sub> emissions.

To further clarify these relationships, we examined the correlations between CO<sub>2</sub> fluxes and environmental factors under different green manure treatments (Fig. 7). CO<sub>2</sub> fluxes across nearly all treatments were significantly positively correlated with air temperature (AT) and soil temperature (ST) ( $r > 0.5$ ,  $p < 0.05$ ), suggesting temperature as a major driver of CO<sub>2</sub> emissions in tea plantations. Treatment-specific differences were also apparent: in green manure treatments (HM and SM), both TC and SOC in tea rows and inter-row zones showed negative correlations with CO<sub>2</sub> flux, whereas volumetric water content (VWC) showed significant positive correlation ( $r > 0.5$ ,  $p < 0.05$ ). In contrast, VWC was negatively correlated with CO<sub>2</sub> flux under CK treatment. These findings suggest that green manure intercropping alters soil pore structure and moisture regimes, thereby modifying CO<sub>2</sub> emission dynamics compared to bare soil conditions. Additionally, environmental controls on CO<sub>2</sub> fluxes differed between tea rows and inter-row zones. Emissions in tea rows appeared less sensitive to environmental fluctuations, likely due to the moderating effects of tea canopy coverage and root systems.

Canonical correspondence analysis (CCA) was further performed to examine the effect of green manure intercropping patterns and soil properties on CO<sub>2</sub> emissions in tea rows and inter-row zones (Fig. 8). The first two CCA axes explained 52.79% and 11.15% of the total variance, respectively. CCA1 was primarily associated with NH<sub>4</sub><sup>+</sup>-N, NO<sub>3</sub><sup>-</sup>-N, SOC, and the C/N ratio, while CCA2 was mainly linked to TN, TC, MBN, MBC, and pH. These results indicate distinct environmental drivers of CO<sub>2</sub> emissions between the two spatial zones. In tea rows, CO<sub>2</sub> flux was positively associated with

NO<sub>3</sub><sup>-</sup>-N and the C/N ratio, with relatively minor influence from pH. The influencing soil factors were similar for CKT and SMT, whereas HMT displayed a distinct pattern, likely attributable to the presence of leguminous green manure. In inter-row zones, SOC emerged as the dominant factor controlling CO<sub>2</sub> fluxes in HMG and SMG treatments, whereas NH<sub>4</sub><sup>+</sup>-N was the key driver in CKG. Moreover, TC, TN, MBC, and MBN all showed positive associations with inter-row CO<sub>2</sub> fluxes, with consistent soil drivers under HMG and SMG that differed from CKG, indicating that green manure significantly affects soil–CO<sub>2</sub> interactions.

## **4 Discussion**

### **4.1 CO<sub>2</sub> Flux Dynamics under Green Manure Intercropping**

This study revealed pronounced seasonal variations in CO<sub>2</sub> fluxes from tea plantations, which were closely aligned with fluctuations in air temperature (Fig. 2a-c). In spring, rising temperatures enhanced both plant and microbial respiration, leading to a sharp increase in CO<sub>2</sub> emissions (Yan et al., 2022). During summer, when temperatures reached their annual peak, intensified microbial activity accelerated the decomposition of soil organic matter, resulting in the highest CO<sub>2</sub> fluxes of the year (Allison et al., 2010). In autumn, declining temperatures and light availability reduced microbial activity and soil respiration, thereby lowering CO<sub>2</sub> emissions (Liu et al., 2020). In winter, low temperatures significantly inhibited both plant and microbial respiration, causing CO<sub>2</sub> fluxes to drop to their annual minimum (Schnecker et al., 2023). These seasonal flux patterns were consistent throughout the two-year observation period, indicating the pivotal role of temperature in regulating CO<sub>2</sub> emissions in tea plantations (Chen et al., 2021).

Compared with the CK treatment, HM and SM increased annual cumulative CO<sub>2</sub> emissions by 3.3% and 7.9%, respectively, revealing that green manure intercropping significantly elevated total CO<sub>2</sub> emissions. Similar findings have been reported in previous studies. For example, Lee et al. (2021) observed consistently higher cumulative CO<sub>2</sub> emissions in cropland soils under green manure treatments than under fallow conditions. A meta-analysis by Muhammad et al. (2019) also showed that the

use of cover crops generally increases CO<sub>2</sub> emissions compared with bare soil. This effect can be attributed to two possible mechanisms: 1) green manure crops introduce exogenous carbon inputs into the soil, which stimulates CO<sub>2</sub> release (Ho et al., 2021); and 2) green manure intercropping reduces soil bulk density and increases total porosity (Song et al., 2016), thereby improving soil aeration and promoting aerobic microbial activity. The enhanced microbial activity accelerates the decomposition and mineralization of soil organic matter, consequently increasing CO<sub>2</sub> emissions (Chen et al., 2019). By contrast, under the CK treatment, higher WFPS and greater soil compaction may have inhibited gas diffusion and limited CO<sub>2</sub> release into the atmosphere (Lang et al., 2017).

Diurnal variations of CO<sub>2</sub> fluxes were influenced by both seasonal dynamics and the growth stages of green manure crops. CO<sub>2</sub> fluxes fluctuated most sharply during spring and summer, with temperature identified as the primary driver of daily flux patterns (Pang et al., 2019). In spring, negative CO<sub>2</sub> flux peaks were observed in tea rows under HMT and SMT around 08:00, due to low morning temperatures suppressing microbial respiration. Moreover, the presence of easily degradable organic matter from green manure may have diverted microbial metabolism toward biomass accumulation rather than complete mineralization to CO<sub>2</sub>. In summer, distinct spatial differences appeared between tea rows and inter-row zones. In tea rows, CO<sub>2</sub> fluxes under the CKT treatment were significantly higher than those under HMT and SMT, while in the inter-row zones, fluxes under HMG and SMG were higher than those under CKG. This spatial heterogeneity highlights the dual role of green manure: in tea rows, the shading effect of green manure canopy reduced soil temperatures, thereby inhibiting microbial respiration; in contrast, inter-row zones were exposed to direct sunlight, root exudates and decomposing plant residues provided additional carbon sources. Under favorable thermal conditions, this stimulated microbial activity and thus increased CO<sub>2</sub> emissions (Gui et al., 2024). In autumn and winter, CO<sub>2</sub> flux peaks were mostly recorded in the afternoon, possibly due to rising temperatures reaching a threshold that accelerated enzymatic reactions and microbial metabolism, enhancing root and soil respiration and thus elevating CO<sub>2</sub> emissions (Dove et al., 2021).



## 4.2 Influence of Cultivation Management on CO<sub>2</sub> Fluxes

Fertilization, pruning, and soil tillage with cover cropping are critical anthropogenic management practices in tea plantations that significantly affect CO<sub>2</sub> flux dynamics. Fertilizer application, in particular, is a major contributor to agricultural greenhouse gas emissions, with emission strength influenced by the type, amount, and method of application (Wang et al., 2024). In this study, the application of rapeseed cake and compound fertilizers significantly increased soil CO<sub>2</sub> fluxes, especially within tea rows. This increase can be attributed to two main factors: 1) the input of exogenous organic matter enriched soil organic carbon content; and 2) trench fertilization caused physical disturbance, disrupting soil aggregates and accelerating the decomposition of soil organic carbon. These disturbances stimulated the abundance and metabolic activity of aerobic heterotrophic microbes, promoting organic matter mineralization and resulting in elevated CO<sub>2</sub> emissions (Chappell et al., 2015; Struck et al., 2020). Intensive pruning conducted in May and August further contributed to increased CO<sub>2</sub> fluxes. Pruning substantially reduces the photosynthetic biomass of tea plants, diminishing their carbon sequestration capacity. Simultaneously, the resulting litterfall provides abundant substrates for microbial respiration (Pang et al., 2019). The combined effect of reduced carbon uptake and increased decomposition substrates leads to a rapid short-term increase in CO<sub>2</sub> emissions after pruning.

Previous studies have demonstrated that intercropping systems introduce readily decomposable carbon through root exudates, while green manure decomposition increases organic matter inputs and improves soil organic carbon storage (Gui et al., 2024). In this study, CO<sub>2</sub> fluxes in inter-row zones were significantly higher than the control during the wilting and decomposition stages of green manure, suggesting that microbial activity was enhanced during these periods, thereby accelerating the decomposition and transformation of organic matter and intensifying soil respiration. Additionally, soils under green manure treatments exhibited lower annual average temperatures compared to the control, indicating that intercropping with green manure moderated surface soil temperatures and reduced daily temperature fluctuations. This

effect was particularly pronounced in summer, when green manure not only reduced inter-row CO<sub>2</sub> emissions but also improved the microclimatic conditions of the tea plantation.

Traditional CO<sub>2</sub> flux measurements in tea plantations have mostly focused only on tea rows, often neglecting inter-row soil emissions (Yao et al., 2015; Chen et al., 2021). In this study, static chambers were parallelly employed to measure CO<sub>2</sub> fluxes in tea rows and inter-row areas, enabling a more accurate understanding of CO<sub>2</sub> emissions. Results showed that inter-row CO<sub>2</sub> fluxes were significantly higher than those in tea rows ( $p < 0.05$ ), accounting for 52.6%, 57.3%, and 60.8% of the annual cumulative CO<sub>2</sub> emissions under CK, HM, and SM treatments, respectively. These findings emphasize the substantial contribution of inter-row zones to overall CO<sub>2</sub> emissions. This discrepancy is due to differences in management intensity: fertilization and tillage are commonly performed in inter-row areas, while the soil beneath tea canopies experiences minimal disturbance (Hirono and Nonaka, 2012). Moreover, pruning residues often accumulate in inter-row zones, further intensifying microbial activity and CO<sub>2</sub> emissions in these areas. The cumulative CO<sub>2</sub> emissions under HMG and SMG treatments were significantly lower in the second year. The decrease in emissions can be attributed to the gradual attenuation of the carbon priming effect induced by soil disturbance during the initial experimental phase (Zhou, 2025), coupled with the long-term positive effects of green manure on enhancing soil physical structure and ecosystem stability (Gui et al., 2024). The increase in green manure biomass in the following year indicates that the green manure system is transitioning from an initially disturbed and unstable state toward a more productive and carbon-sequestration-enhanced stable state (Figure A1). This trend not only reflects the improved functioning of the soil ecosystem but also serves as an important driver for further carbon sequestration, contributing significantly to the reduction in inter-row CO<sub>2</sub> emissions observed in the following year. Therefore, long-term and systematic monitoring of inter-row soil CO<sub>2</sub> emissions is essential for accurately assessing the carbon dynamics and mitigation potential of tea plantation ecosystems.

### 4.3 Differences in Environmental Drivers

Soil CO<sub>2</sub> fluxes are regulated by multiple environmental factors, including photosynthetic activity or vegetation productivity (Tang et al., 2005), and soil properties such as temperature and moisture (Liu et al., 2023; Widanagamage et al., 2025). Among them, temperature is widely recognized as a primary driver of seasonal variation in soil respiration (Lang et al., 2017). Our results showed that CO<sub>2</sub> fluxes in both tea rows and inter-row areas were significantly correlated with soil and air temperatures under different green manure treatments (Fig. 7). In addition, carbon and nitrogen transformation processes driven by microorganisms are closely coupled. Nitrification and denitrification alter NO<sub>3</sub><sup>-</sup>-N and NH<sub>4</sub><sup>+</sup>-N levels, thereby influencing soil physicochemical properties and microbial activity. As a result, CO<sub>2</sub> emissions exhibit significant positive correlations with nitrogen mineralization, denitrification, and N<sub>2</sub>O emissions (Dai et al., 2020). This carbon–nitrogen coupling may interact with the distinctive nutrient uptake characteristics of tea plants, which are ammonium-preferring species with rapid NH<sub>4</sub><sup>+</sup> assimilation (Xin et al., 2024). In our study, CO<sub>2</sub> fluxes under the CKG treatment were positively correlated with NH<sub>4</sub><sup>+</sup>-N content (Fig. 9). NH<sub>4</sub><sup>+</sup>-N levels under this treatment (71.20 mg·kg<sup>-1</sup>) were significantly higher than in the SMG and HMG treatments, whereas the corresponding soil pH value (3.97) was significantly lower ( $p < 0.05$ ). This concurrent high NH<sub>4</sub><sup>+</sup>-N level and strong acidification is due to ammonium accumulation under conventional fertilization and subsequent H<sup>+</sup> release during nitrification (Chen et al., 2021). By contrast, the soil pH under green manure intercropping treatments increased by 0.02–0.11 units compared to the CK treatment (Fig. 6i), suggesting that root exudates and organic matter inputs from green manure buffered soil acidification by reducing H<sup>+</sup> release during NH<sub>4</sub><sup>+</sup> nitrification. Moreover, the NO<sub>3</sub><sup>-</sup>-N concentration in the SMG treatment (14.56 mg·kg<sup>-1</sup>) was significantly higher than that in other treatments (Fig. 6e), due to the high biomass of *Vulpia myuros* C., which may reduce nitrate losses via runoff or leaching. Its active root system also improved soil aeration, inhibiting denitrification under anoxic conditions.

SOC content reflects the dynamic balance between organic matter inputs and decomposition (Mo et al., 2024). In our study, SOC levels in the HMT and SMT

treatments were higher than those in the CKT treatment, while their cumulative annual CO<sub>2</sub> emissions were lower. This indicates that increasing SOC storage can help mitigate greenhouse gas emissions, consistent with findings by Han et al. (2022). However, the HMG and SMG treatments exhibited much higher SOC levels than CKG, while their cumulative CO<sub>2</sub> emissions exceeded those of CKG. This implies that once SOC accumulation surpasses a certain threshold, the excess carbon supply may stimulate microbial activity and subsequently increase CO<sub>2</sub> emissions (Lim and Choi, 2014). Interestingly, recent studies reveal that SOC thresholds can modulate the impact of nitrogen fertilization on carbon sequestration. In SOC-poor soils, nitrogen inputs tend to promote carbon accumulation and soil aggregation, enhancing SOC storage. Conversely, in SOC-rich soils, nitrogen fertilization may enhance microbial metabolic efficiency and increase microbial residue production (Ling et al., 2025). Studies in different climatic zones of China have revealed that SOC thresholds are influenced by factors such as climate and soil type. In the maritime monsoon climate zone, dual thresholds for NO<sub>3</sub><sup>-</sup>-N and extractable iron (Fe) have been identified, beyond which their marginal effects on SOC shift significantly. In the continental monsoon climate zone, SOC content increases markedly once a critical threshold of TN is exceeded (Cui, 2025). Additionally, research in alpine ecosystems has shown that SOC components vary along elevation gradients and exhibit distinct thresholds (Zhang, 2025). These insights provide a new perspective for interpreting our results and highlight the importance of identifying threshold values under multifactorial interactions to better assess their effects on CO<sub>2</sub> emissions.

In tea rows, excessively high soil C/N ratios may result in nitrogen limitation, thereby inhibiting rapid decomposition of organic matter and reducing CO<sub>2</sub> fluxes. Green manure, as a fresh plant residue with a relatively low C/N ratio, can be rapidly decomposed by soil microbes after incorporation, thus maintaining or enhancing SOC levels (Li et al., 2024), which aligns with our observations (Fig. 7d). MBC and MBN are generally considered closely linked to SOC (Gao et al., 2022). However, in our study, a significant positive correlation between MBC and SOC was only observed in the CKT treatment. The lack of correlation under green manure treatments may be due

to the rapid and excessive input of exogenous carbon, which complicates the relationship between these variables. No significant differences in MBC and MBN levels were found among green manure treatments, and both showed weak correlations with CO<sub>2</sub> fluxes (Fig. 8), suggesting that MBC and MBN are not key drivers of CO<sub>2</sub> emissions in tea plantations.

## 5 Conclusion

This study revealed the regulation of CO<sub>2</sub> fluxes in tea plantations under different green manure intercropping treatments. Green manure significantly influenced CO<sub>2</sub> flux dynamics, with pronounced seasonal variations, higher fluxes in summer and autumn and lower fluxes in spring and winter. CO<sub>2</sub> emissions from inter-row areas were consistently higher than those from tea rows. CO<sub>2</sub> fluxes in the SM and HM treatments were significantly lower than in the CK treatment within tea rows, while the opposite trend was observed in inter-row areas, suggesting distinct spatial responses to green manure intercropping. Over the observation period, the HM and SM treatments reduced CO<sub>2</sub> emissions from tea rows by 7.1%–7.9% compared to the CK, while increasing inter-row emissions by 12.7%–28.9%. Inter-row CO<sub>2</sub> emissions accounted for 52.6%, 57.3%, and 60.8% of the annual cumulative CO<sub>2</sub> fluxes under the CK, HM, and SM treatments, respectively. These findings highlight the importance of incorporating spatial emission weighting into carbon accounting for agricultural ecosystems.

The observed spatial differences in CO<sub>2</sub> fluxes were closely related to variations in SOC content. Our findings suggest the existence of a critical SOC threshold that determines whether CO<sub>2</sub> emissions increase or decrease. Future research should focus on quantifying such thresholds under multi-factor interactions to better assess their impacts on greenhouse gas dynamics. Continuous green manure intercropping over two years significantly reduced inter-row CO<sub>2</sub> emissions, and the HM treatment suppressed fertilization-induced emission peaks. These findings demonstrate that green manure intercropping, particularly mixed legume and non-legume combinations, can effectively alter the spatial pattern of CO<sub>2</sub> emissions and mitigate carbon losses. Moreover, this practice provides significant co-benefits like improved soil aeration and

fertility, reduced chemical fertilizers, weed suppression, and promoted tea plant growth, thereby offsetting the extra costs in labor and seeds. Therefore, green manure intercropping emerges as a practical and multifunctional strategy for reducing carbon emissions in agroecosystems.

#### **Data availability**

The datasets generated and analyzed during this study are available from the corresponding author upon reasonable request.

#### **Author contributions**

S. Liu conceived and designed the study, performed the data analysis, and drafted the manuscript. S. Liu, Z. Jin, and Z. Chen contributed to data visualization. H. Li, Z. Fan, S. Li, H. Fu, K. Zang, W. He, and P. Yan conducted field and laboratory work. S. Fang supervised the research, provided funding, and contributed to manuscript review and editing.

#### **Competing interests**

The contact author has declared that none of the authors has any competing interests.

#### **Acknowledgments**

This study was funded by the National Natural Science Foundation of China (42307126), the National Key Research and Development Program of China (2023YFC3705205), Key Scientific Research Project of Tea Research Institute, Chinese Academy of Agricultural Sciences (TRI-ZDRW-01-04), Open Fund Project of Key Open Laboratory of Ecosystem Carbon Sources and Sinks (ECSS-CMA202309), and the Zhejiang Provincial Research Development Program (2024C03246). We also thanks to the staff who have contributed to the flux measurements at Shengzhou.

## References

- Allison, S.D., Wallenstein, M.D., and Bradford, M.A.: Soil-carbon response to warming dependent on microbial physiology, *Nat. Geosci.*, 3, 336–340, <http://doi.org/10.1038/ngeo846>, 2010.
- Chappell, A., Baldock, J., and Sanderman, J.: The global significance of omitting soil erosion from soil organic carbon cycling schemes, *Nat. Clim. Chang.*, 6, 187–191, <http://doi.org/10.1038/nclimate2829>, 2015.
- Chen, D., Li, Y., Wang, C., Liu, X., Wang, Y., Shen, J., Qin, J., and Wu, J.: Dynamics and underlying mechanisms of N<sub>2</sub>O and NO emissions in response to a transient land-use conversion of Masson pine forest to tea field, *Sci. Total Environ.*, 693, 133549, <http://doi.org/10.1016/j.scitotenv.2019.07.355>, 2019.
- Chen, D., Wang, C., Li, Y., Liu, X., Qin, J., and Wu, J.: Effects of land-use conversion from Masson pine forests to tea plantations on net ecosystem carbon and greenhouse gas budgets. *Agric. Ecosyst. Environ.*, 320, 107578, <http://doi.org/10.1016/j.agee.2021.107578>, 2021.
- Cui, J., Xu, Y., Wang, M., Liu, A., Sun, L., Feng, X., Yang, Q., Wang, S., Liu, H., Lv, Y., and Liu, K.: Nonlinear threshold responses and spatial heterogeneity of soil organic carbon under contrasting pedoclimatic regimes, *Front. Plant Sci.*, 16, 1703663, <http://doi.org/10.3389/fpls.2025.1703663>, 2025.
- Dai, Z., Yu, M., Chen, H., Zhao, H., Huang, Y., Su, W., Xia, F., Chang, S., Brookes, P., Dahlgren, R., and Xu, J.: Elevated temperature shifts soil N cycling from microbial immobilization to enhanced mineralization, nitrification and denitrification across global terrestrial ecosystems, *Glob. Change Biol.*, 26, 5267–5276, <http://doi.org/10.1111/gcb.15211>, 2020.
- Dove, N., Torn, M.S., Hart, S.C., and Tas, N.: Metabolic capabilities mute positive response to direct and indirect impacts of warming throughout the soil profile, *Nat. Commun.*, 12, 2089, <http://doi.org/10.1038/s41467-021-22408-5>, 2021.
- FAO, Statistical databases: <https://www.fao.org/faostat/en/#data/>, last accessed: 11 June 2025.
- Gao, D., Bai, E., Wang, S., Zong, S., Liu, Z., Fan, X., Zhao, C., and Hagedorn, F.:

674 Three-dimensional mapping of carbon, nitrogen, and phosphorus in soil  
675 microbial biomass and their stoichiometry at the global scale, *Glob. Change*  
676 *Biol.*, 28, 6728–6740, <http://doi.org/10.1111/gcb.16374>, 2022.

677 Gong, Y., Li, P., Sakagami, N., and Komatsuzaki, M.: No-tillage with rye cover crop  
678 can reduce net global warming potential and yield-scaled global warming  
679 potential in the long-term organic soybean field, *Soil Tillage Res.*, 205, 104747,  
680 <http://doi.org/10.1016/j.still.2020.104747>, 2021.

681 Gui, D., Zhang, Y., Lv, J., Guo, J., and Sha, Z.: Effects of intercropping on soil  
682 greenhouse gas emissions - A global meta-analysis, *Sci. Total Environ.*, 918,  
683 170632, <http://doi.org/10.1016/j.scitotenv.2024.170632>, 2024.

684 Han, W., Xu, J., Wei, K., Shi, Y., and Ma, L.: Estimation of N<sub>2</sub>O emission from tea  
685 garden soils, their adjacent vegetable garden and forest soils in eastern China,  
686 *Environ. Earth Sci.*, 70, 2495–2500, <http://doi.org/10.1007/s12665-013-2292-4>,  
687 2013.

688 Han, Z., Lin, H., Xu, P., Li, Z., Wang, J., and Zou, J.: Impact of organic fertilizer  
689 substitution and biochar amendment on net greenhouse gas budget in a tea  
690 plantation, *Agric. Ecosyst. Environ.*, 326, 107779,  
691 <http://doi.org/10.1016/j.agee.2021.107779>, 2022.

692 Hirono, Y., and Nonaka, K.: Nitrous oxide emissions from green tea fields in Japan:  
693 contribution of emissions from soil between rows and soil under the canopy of  
694 tea plants, *Soil Sci. Plant Nutr.*, 58, 384–392,  
695 <http://doi.org/10.1080/00380768.2012.686434>, 2012.

696 Huang, X., Zheng, Y., Li, P., Cui, J., Sui, P., Chen, Y., and Gao, W.: Organic  
697 management increases beneficial microorganisms and promotes the stability of  
698 microecological networks in tea plantation soil, *Front. Microbiol.*, 14, 1237842,  
699 <http://doi.org/10.3389/fmicb.2023.1237842>, 2023.

700 IPCC: Climate Change 2022: Impacts, Adaptation, and Vulnerability, contribution of  
701 Working Group II to the Sixth Assessment Report of the Intergovernmental  
702 Panel on Climate Change, Cambridge University Press, Cambridge, 2022.

703 Ji, C., Li, S., Geng, Y., Yuan, Y., Zhi, J., Yu, K., Han, Z., Wu, S., Liu, S., and Zou, J.:



704 Decreased N<sub>2</sub>O and NO emissions associated with stimulated denitrification  
 705 following biochar amendment in subtropical tea plantations, *Geoderma*, 365,  
 706 114223, <http://doi.org/10.1016/j.geoderma.2020.114223>, 2020.

707 Kim, S.Y., Lee, C.H., Gutierrez, J., and Kim, P.J.: Contribution of winter cover crop  
 708 amendments on global warming potential in rice paddy soil during cultivation,  
 709 *Plant Soil*, 366, 273–286, <http://doi.org/10.1007/s11104-012-1403-4>, 2013.

710 Lang, R., Blagodatsky, S., Xu, J., and Cadisc, G.: Seasonal differences in soil  
 711 respiration and methane uptake in rubber plantation and rainforest, *Agric.*  
 712 *Ecosyst. Environ.*, 240, 314–328, <http://doi.org/10.1016/j.agee.2017.02.032>,  
 713 2017.

714 Lee, L.H., Kim, S.U., Han, H.R., Hur, D., Owens, V.N., Kumar, S., and Hong, C.O.:  
 715 Mitigation of global warming potential and greenhouse gas intensity in arable  
 716 soil with green manure as source of nitrogen, *Environ. Pollut.*, 288, 117724,  
 717 <http://doi.org/10.1016/j.envpol.2021.117724>, 2021.

718 Li, B., Gasser, T., Ciais, P., Piao, S., Tao, S., Balkanski, Y., Hauglustaine, D., Boisier,  
 719 J.P., Chen, Z., Huang, M., Li, L., Li, Y., Liu, H., Liu, J., Peng, S., Shen, Z., Sun,  
 720 Z., Wang, R., Wang, T., Yin, G., Yin, Y., Zeng, H., Zeng, Z., and Zhou, F.: The  
 721 contribution of China's emissions to global climate forcing, *Nature*, 531, 357–  
 722 361, <http://doi.org/10.1038/nature17165>, 2016.

723 Li, P., Jia, L., Chen, Q., Zhang, H., Deng, J., Lu, J., Xu, L., Li, H., Hu, F., and Jiao, J.:  
 724 Adaptive evaluation for agricultural sustainability of different fertilizer  
 725 management options for a green manure-maize rotation system: Impacts on crop  
 726 yield, soil biochemical properties and organic carbon fractions, *Sci. Total*  
 727 *Environ.*, 908, 168170, <http://doi.org/10.1016/j.scitotenv.2023.168170>, 2024.

728 Lim, S.S., and Choi, W.J.: Changes in microbial biomass, CH<sub>4</sub> and CO<sub>2</sub> emissions, and  
 729 soil carbon content by fly ash co-applied with organic inputs with contrasting  
 730 substrate quality under changing water regimes, *Soil Biol. and Biochem.*, 68,  
 731 494–502, <http://doi.org/10.1016/j.soilbio.2013.10.027>, 2014.

732 Ling, J., Dungait, J.A.J., Delgado, B.M., Cui, Z., Zhou, R., Zhang, W., Gao, Q., Chen,  
 733 Y., Yue, S., Kuzyakov, Y., Zhang, F., Chen, X., and Tian, J.: Soil organic carbon

734 thresholds control fertilizer effects on carbon accrual in croplands worldwide,  
 735 Nat. Commun., 16, 3009–3009, <http://doi.org/10.1038/s41467-025-57981-6>,  
 736 2025.

737 Liu, S., Lin, F., Wu, S., Ji, C., Sun, Y., Jin, Y., Li, S., Li, Z., and Zou, J.: A meta-analysis  
 738 of fertilizer-induced soil NO and combined NO+N<sub>2</sub>O emissions. Glob. Change  
 739 Biol., 23, 2520–2532, <http://doi.org/10.1111/gcb.13485>, 2016.

740 Liu, Z., Liu, W., Liu, H., Gao, T., Zhao, H., Li, G., Han, H., Li, Z., Lal, R., and Ning,  
 741 T.: Capture of soil respiration for higher photosynthesis with lower CO<sub>2</sub>  
 742 emission, J. Clean Prod., 246, 119029,  
 743 <http://doi.org/10.1016/j.jclepro.2019.119029>, 2020.

744 Liu, C., Bol, R., Ju, X., Ju, X., Tian, J., and Wu, D.: Trade-offs on carbon and nitrogen  
 745 availability lead to only a minor effect of elevated CO<sub>2</sub> on potential  
 746 denitrification in soil, Soil Biol. Biochem., 176, 108888,  
 747 <http://doi.org/https://doi.org/10.1016/j.soilbio.2022.108888>, 2023.

748 Mo, F., Yang, D., Wang, X., Crowther, T.W., Vinay, N., Luo, Z., Yu, K., Sun, S., Zhang,  
 749 F., Xiong, Y., and Liao, Y.: Nutrient limitation of soil organic carbon stocks  
 750 under straw return, Soil Biol. Biochem., 192, 109360,  
 751 <http://doi.org/10.1016/j.soilbio.2024.109360>, 2024.

752 Muhammad, I., Sainju, U.M., Zhao, F., Khan, A., Ghimire, R., Fu, X., and Wang, J.:  
 753 Regulation of soil CO<sub>2</sub> and N<sub>2</sub>O emissions by cover crops: A meta-analysis, Soil  
 754 Tillage Res., 192, 103–112, <http://doi.org/10.1016/j.still.2019.04.020>, 2019.

755 Ni, K., Liao, W., Yi, X., Niu, S., Ma, L., Shi, Y., Zhang, Q., Liu, M., and Ruan, J.:  
 756 Fertilization status and reduction potential in tea gardens of China, J. Plant Nutr.  
 757 Fert., 25, 421–432, 2019.

758 Pang, J., Li, H., Tang, X., and Geng, J.: Carbon dynamics and environmental controls  
 759 of a hilly tea plantation in Southeast China, Ecol. Evol. 9, 9723–9735,  
 760 <http://doi.org/10.1002/ece3.5504>, 2019.

761 Qian, H., Zhu, X., Huang, S., Linguist, B., Kuzyakov, Y., Wassmann, R., Minamikawa,  
 762 K., Martinez, E.M., Yan, X., Zhou, F., Sander, B.O., Zhang, W., Shang, Z., Zou,  
 763 J., Zheng, X., Li, G., Liu, Z., Wang, S., Ding, Y., van Groenigen, K.J., and Jiang,

- Y.: Greenhouse gas emissions and mitigation in rice agriculture, *Nat. Rev. Earth Environ.*, 4, 716–732, <http://doi.org/10.1038/s43017-023-00482-1>, 2023.
- Schnecker, J., Baldaszi, L., Gündler, P., Pleitner, M., Sandén, T., Simon, E., Spiegel, F., Spiegel, H., Urbina Malo, C., Zechmeister-Boltenstern, S., and Richter, A.: Seasonal dynamics of soil microbial growth, respiration, biomass, and carbon use efficiency in temperate soils, *Geoderma* 440, 116693, <http://doi.org/10.1016/j.geoderma.2023.116693>, 2023.
- Song, L., Liao, W., Wang, Y., Su, Y., Zhang, Y., Luo, Y., and Sun, L.: Effects of Interplanting Green Manure on Soil Physico-chemical Characters in Tea Plantation, *Soils* 48, 675–679, 2016.
- Song, J., Song, J., Xu, W., Gao, G., Bai, J., Zhang, Z., Yu, Q., Hao, J., Yang, G., Ren, G., Feng, Y., and Wang, X.: Straw return with fertilizer improves soil CO<sub>2</sub> emissions by mitigating microbial nitrogen limitation during the winter wheat season, *Catena* 241, 108050, <http://doi.org/10.1016/j.catena.2024.108050>, 2024.
- Struck, I.J.A., Taube, F., Hoffmann, M., Kluß, C., Herrmann, A., Loges, R., and Reinsch, T.: Full greenhouse gas balance of silage maize cultivation following grassland: Are no-tillage practices favorable under highly productive soil conditions?, *Soil Tillage Res.*, 200, 104615, <http://doi.org/10.1016/j.still.2020.104615>, 2020.
- Tang, J., Baldocchi, D.D., and Xu, L.: Tree photosynthesis modulates soil respiration on a diurnal time scale, *Glob. Change Biol.*, 11, 1298–1304, <http://doi.org/10.1111/j.1365-2486.2005.00978.x>, 2005.
- Wang, J., Smith, P., Hergoualc'h, K., and Zou, J.: Direct N<sub>2</sub>O emissions from global tea plantations and mitigation potential by climate-smart practices, *Resour. Conserv. Recycl.*, 185, 106501, <http://doi.org/10.1016/j.resconrec.2022.106501>, 2022.
- Wang, B., Wang, S., Li, G., Fu, L., Chen, H., Yin, M., and Chen, J.: Reducing nitrogen fertilizer usage coupled with organic substitution improves soil quality and boosts tea yield and quality in tea plantations, *J. Sci. Food Agric.*, 105, 1228–1238, <http://doi.org/10.1002/jsfa.13913>, 2024.
- Wang, G., Zhao, M., Zhao, B., Liu, X., and Wang, Y.: Reshaping Agriculture Eco-efficiency in China: From Greenhouse Gas Perspective, *Ecol. Indic.*, 172,

113268, <http://doi.org/10.1016/j.ecolind.2025.113268>, 2025.

Wanyama, I., Pelster, D.E., Butterbach-Bahl, K., Verchot, L. V., Martius, C., and Rufino, M. C.: Soil carbon dioxide and methane fluxes from forests and other land use types in an African tropical montane region, *Biogeochemistry*, 143, 171–190, <http://doi.org/10.1007/s10533-019-00555-8>, 2019.

Widanagamage, N., Santos, E., Rice, C.W., and Patrignani, A.: Study of soil heterotrophic respiration as a function of soil moisture under different land covers, *Soil Biol. Biochem.*, 200, 109593, <http://doi.org/10.1016/j.soilbio.2024.109593>, 2025.

WMO: Greenhouse Gas Bulletin-No. 20: The state of greenhouse gases in the atmosphere based on global observations through 2023, WMO Greenhouse Gas Bulletin, Switzerland, 2024.

Wu, Y., Li, Y., Fu, X., Shen, J., Chen, D., Wang, Y., Liu, X., Xiao, R., Wei, W., and Wu, J.: Effect of controlled-release fertilizer on N<sub>2</sub>O emissions and tea yield from a tea field in subtropical central China, *Environ. Sci. Pollut. Res.*, 25, 25580–25590, <http://doi.org/10.1007/s11356-018-2646-2>, 2018.

Wu, Y., Li, Y., Wang, H., Wang, Z., Fu, X., Shen, J., Wang, Y., Liu, X., Meng, L., and Wu, J.: Response of N<sub>2</sub>O emissions to biochar amendment on a tea field soil in subtropical central China: A three-year field experiment, *Agric. Ecosyst. Environ.*, 318, 107473, <http://doi.org/10.1016/j.agee.2021.107473>, 2021.

Xin, W., Zhang, J., Yu, Y., Tian, Y., Li, H., Chen, X., Li, W., Liu, Y., Lu, T., He, B., Xiong, Y., Yang, Z., Xu, T., and Tang, W.: Root microbiota of tea plants regulate nitrogen homeostasis and theanine synthesis to influence tea quality, *Curr. Biol.*, 34, 868–880, <http://doi.org/10.1016/j.cub.2024.01.044>, 2024.

Xu, B., and Lin, B.: Factors affecting CO<sub>2</sub> emissions in China's agriculture sector: Evidence from geographically weighted regression model, *Energy Policy*, 104, 404–414. <http://doi.org/10.1016/j.enpol.2017.02.011>, 2017.

Xu, X., Zhao, Q., Guo, J., Li, C., Li, J., Niu, K., Jin, S., Fu, C., Gaffney, P.P.J., Xu, Y., Sun, M., Xue, Y., Chang, D., Zhang, Y., Si, W., Fan, S., and Zhang, L.: Inequality in agricultural greenhouse gas emissions intensity has risen in rural

824 China from 1993 to 2020, *Nat. Food*, 5, 916–928,  
825 <http://doi.org/10.1038/s43016-024-01071-1>, 2024.

826 Yan, P., Wu, L., Wang, D., Fu, J., Shen, C., Li, X., Zhang, L., Zhang, L., Fan, L., and  
827 Han W.: Soil acidification in Chinese tea plantations, *Sci. Total Environ.*, 715,  
828 136963, <http://doi.org/10.1016/j.scitotenv.2020.136963>, 2020.

829 Yan, W., Zhong, Y., Yang, J., and Torn, M.S.: Response of soil greenhouse gas fluxes  
830 to warming: A global meta-analysis of field studies, *Geoderma*, 419, 115865,  
831 <http://doi.org/10.1016/j.geoderma.2022.115865>, 2022.

832 Yang, X., Xiong, J., Du, T., Ju, X., Gan, Y., Li, S., Xia, L., Shen, Y., Pacenka, S.,  
833 Steenhuis, T.S., Siddique, K.H.M., Kang, S., and Butterbach-Bahl, K.:  
834 Diversifying crop rotation increases food production, reduces net greenhouse  
835 gas emissions and improves soil health, *Nat. Commun.*, 15, 198,  
836 <http://doi.org/10.1038/s41467-023-44464-9>, 2024.

837 Yao, Z., Wei, Y., Liu, C., Zheng, X., Xie, B.: Organically fertilized tea plantation  
838 stimulates N<sub>2</sub>O emissions and lowers NO fluxes in subtropical China,  
839 *Biogeosciences*, 12, 5915–5928, <http://doi.org/10.5194/bg-12-5915-2015>, 2015.

840 Zhang, Q., Lei, H., Yang, D., Xiong, L., Liu, P., and Fang, B.: Decadal variation in CO<sub>2</sub>  
841 fluxes and its budget in a wheat and maize rotation cropland over the North  
842 China Plain, *Biogeosciences*, 17, 2245–2262, [http://doi.org/10.5194/bg-17-](http://doi.org/10.5194/bg-17-2245-2020)  
843 [2245-2020](http://doi.org/10.5194/bg-17-2245-2020), 2020.

844 Zhang, W., Lu, J., Bai, J., Khan, A., Liu, S., Zhao, L., Wang, W., Zhu, S., Li, X., Tian,  
845 X., Li, S., and Xiong, Y.: Introduction of soybean into maize field reduces N<sub>2</sub>O  
846 emission intensity via optimizing nitrogen source utilization, *J. Clean Prod.*, 442,  
847 141052, <http://doi.org/10.1016/j.jclepro.2024.141052>, 2024.

848 Zhang, S., Huang, F., Guo, S., Luo, Y., Zhang, L., Zhang, L., Li, Z., Ge, S., Wang, H.,  
849 Fu, J., Li, X., and Yan, P.: Mitigation of soil organic carbon mineralization in  
850 tea plantations through replacement of pruning litter additions with pruning  
851 litter derived biochar and organic fertilizer, *Ind. Crops Prod.*, 225, 120518,  
852 <http://doi.org/10.1016/j.indcrop.2025.120518>, 2025.

853 Zhu, Z., Ge, T., Luo, Y., Liu, S., Xu, X., Tong, C., and Shibistova, O., Guggenberger,

854 G., Wu, J.: Microbial stoichiometric flexibility regulates rice straw  
 855 mineralization and its priming effect in paddy soil, *Soil Biol. Biochem.*, 121,  
 856 67–76, <http://doi.org/10.1016/j.soilbio.2018.03.003>, 2018.

857 Zhou, G., Li, G., Liang, H., Liu, R., Ma, Z., Gao, S., Chang, D., Liu, J., Chadwick, D.R.,  
 858 Jones, D. L., and Cao, W.: Green Manure Coupled With Straw Returning  
 859 Increases Soil Organic Carbon via Decreased Priming Effect and Enhanced  
 860 Microbial Carbon Pump, *Glob. Change Biol.*, 31(5), e70232,  
 861 <http://doi.org/10.1111/gcb.70232>, 2025.

862 Zou, J., Huang, Y., Qin, Y., Shen, Q., Pan, G., Lu, Y., and Liu, Q.: Changes in fertilizer-  
 863 induced direct N<sub>2</sub>O emissions from paddy fields during rice-growing season in  
 864 China between 1950s and 1990s, *Glob. Change Biol.*, 15, 229–242,  
 865 <http://doi.org/10.1111/j.1365-2486.2008.01775.x>, 2009.

866

## Tables and Figures

**Table 1.** Initial basic physicochemical properties of the six treatments.

| Type | pH                       | NH <sub>4</sub> <sup>+</sup> -N<br>(mg·kg <sup>-1</sup> ) | NO <sub>3</sub> <sup>-</sup> -N<br>(mg·kg <sup>-1</sup> ) | TN<br>(g·kg <sup>-1</sup> ) | TC<br>(g·kg <sup>-1</sup> ) | SOC<br>(g·kg <sup>-1</sup> ) |
|------|--------------------------|-----------------------------------------------------------|-----------------------------------------------------------|-----------------------------|-----------------------------|------------------------------|
| CKT  | 4.25±0.06 <sup>a</sup>   | 29.67±7.50 <sup>b</sup>                                   | 5.01±2.02 <sup>b</sup>                                    | 2.16±0.16 <sup>ab</sup>     | 22.93±2.00 <sup>a</sup>     | 25.50±2.65 <sup>a</sup>      |
| HMT  | 4.01±0.06 <sup>ab</sup>  | 37.33±4.43 <sup>ab</sup>                                  | 6.32±2.25 <sup>b</sup>                                    | 2.01±0.09 <sup>ab</sup>     | 21.08±1.12 <sup>a</sup>     | 22.00±1.69 <sup>a</sup>      |
| SMT  | 4.11±0.06 <sup>abc</sup> | 30.42±8.93 <sup>b</sup>                                   | 5.10±1.88 <sup>b</sup>                                    | 1.96±0.12 <sup>b</sup>      | 20.47±1.12 <sup>a</sup>     | 21.83±1.92 <sup>a</sup>      |
| CKG  | 4.16±0.02 <sup>ab</sup>  | 33.20±5.90 <sup>ab</sup>                                  | 8.59±1.46 <sup>ab</sup>                                   | 2.41±0.19 <sup>ab</sup>     | 25.70±1.99 <sup>a</sup>     | 21.68±1.82 <sup>a</sup>      |
| HMG  | 3.98±0.05 <sup>b</sup>   | 37.90±7.98 <sup>ab</sup>                                  | 12.73±3.94 <sup>a</sup>                                   | 2.70±0.35 <sup>a</sup>      | 27.77±3.57 <sup>a</sup>     | 27.98±3.55 <sup>a</sup>      |
| SMG  | 4.00±0.03 <sup>b</sup>   | 44.40±7.33 <sup>a</sup>                                   | 13.36±3.82 <sup>a</sup>                                   | 2.31±0.28 <sup>ab</sup>     | 24.92±2.86 <sup>a</sup>     | 26.88±2.53 <sup>a</sup>      |

\*Data shown are means  $\pm$  SE. Different superscript letters indicate the significant difference ( $p < 0.05$ ). CK for control; SM and HM for intercropping types, T for tea row, G for inter-row.

**Table 2.** Seasonal variation in CO<sub>2</sub> fluxes from tea rows and inter-row zones under different green manure intercropping treatments.

| Type | Spring<br>(mg·m <sup>-2</sup> ·min <sup>-1</sup> ) | Summer<br>(mg·m <sup>-2</sup> ·min <sup>-1</sup> ) | Autumn<br>(mg·m <sup>-2</sup> ·min <sup>-1</sup> ) | Winter<br>(mg·m <sup>-2</sup> ·min <sup>-1</sup> ) |
|------|----------------------------------------------------|----------------------------------------------------|----------------------------------------------------|----------------------------------------------------|
| CKT  | 6.46±0.58 <sup>bcd</sup>                           | 9.66±0.49 <sup>a</sup>                             | 9.93±0.68 <sup>a</sup>                             | 3.60±0.36 <sup>f</sup>                             |
| HMT  | 5.65±0.44 <sup>def</sup>                           | 7.97±0.39 <sup>abc</sup>                           | 9.21±0.46 <sup>a</sup>                             | 4.10±0.43 <sup>ef</sup>                            |
| SMT  | 6.05±0.39 <sup>cde</sup>                           | 8.99±0.34 <sup>a</sup>                             | 8.47±0.30 <sup>ab</sup>                            | 3.71±0.37 <sup>f</sup>                             |
| CKG  | 8.83±1.14 <sup>cd</sup>                            | 10.63±0.66 <sup>abc</sup>                          | 9.76±0.83 <sup>ab</sup>                            | 4.03±0.52 <sup>e</sup>                             |
| HMG  | 9.08±0.49 <sup>cd</sup>                            | 13.03±0.29 <sup>a</sup>                            | 9.38±0.39 <sup>bcd</sup>                           | 4.19±0.29 <sup>e</sup>                             |
| SMG  | 10.76±0.43 <sup>ab</sup>                           | 12.69±0.73 <sup>ab</sup>                           | 10.94±0.86 <sup>abc</sup>                          | 6.03±0.84 <sup>de</sup>                            |

\*Different superscript letters indicate significant differences among treatments and seasons ( $p < 0.05$ ). Data shown are means ± SE. CK for control; SM and HM for intercropping types, T for tea row, G for inter-row.



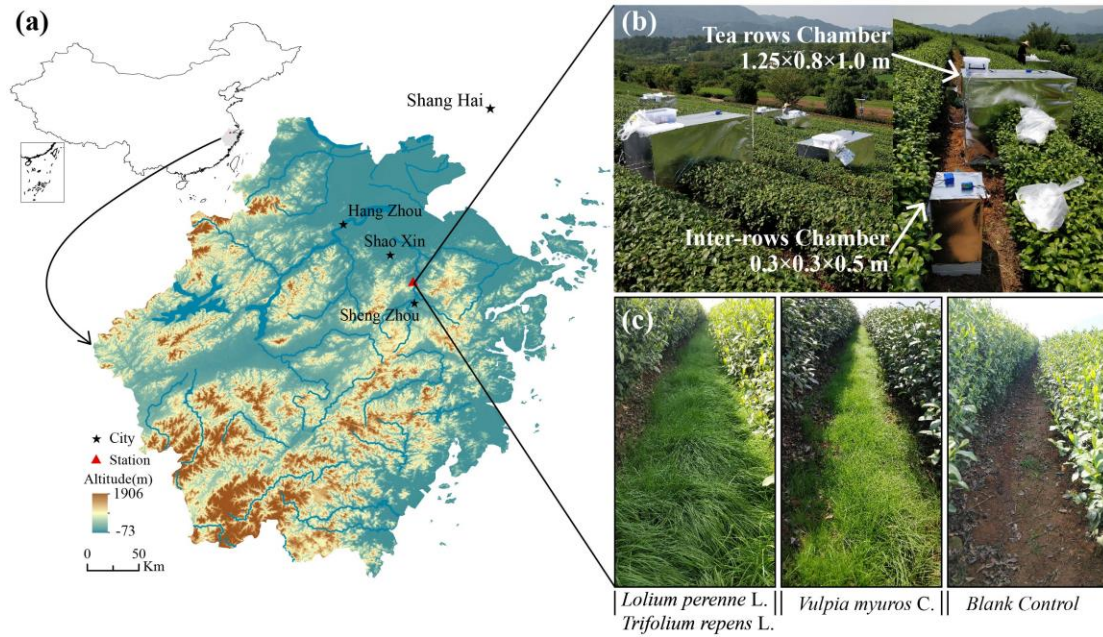

**Figure 1.** (a) Geographic location of the study area in Shengzhou City, Zhejiang Province, China; (b) field layout of the tea plantation experiment; (c) photos of *Lolium perenne* L. and *Trifolium repens* L. plot, and *Vulpia myuros* C. plot, the blank control plot, respectively.

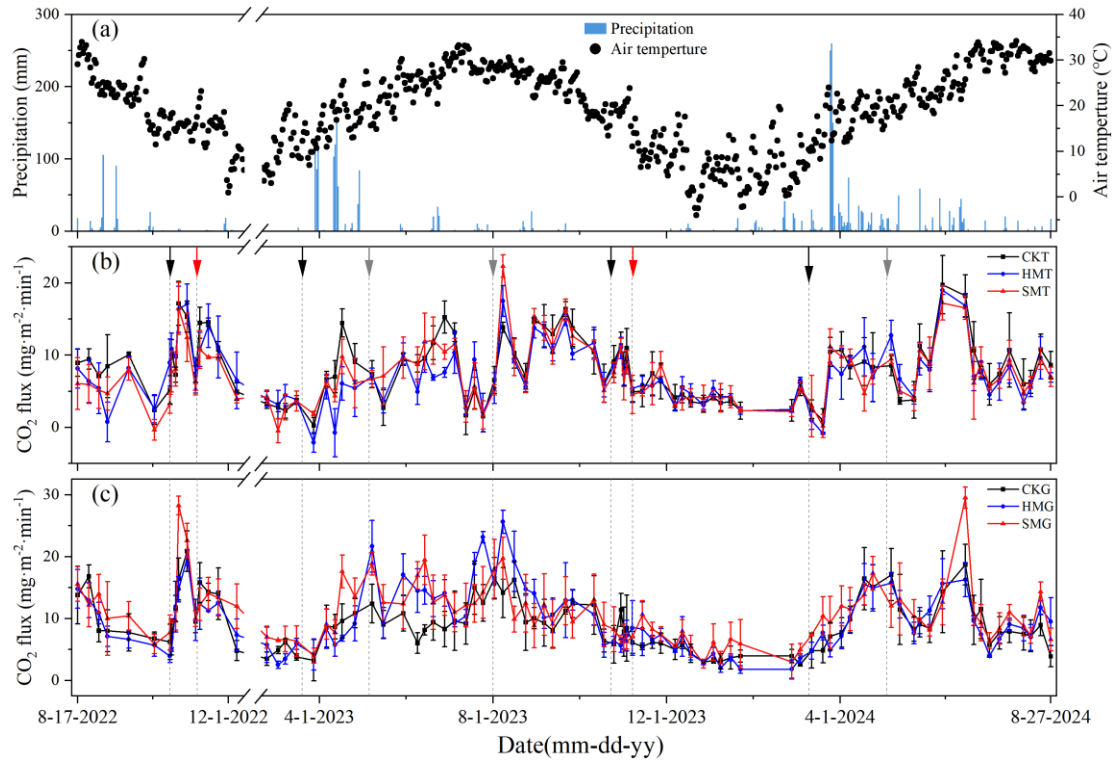

**Figure 2.** Dynamics of (a) air temperature and precipitation, (b) CO<sub>2</sub> fluxes from tea rows, and (c) CO<sub>2</sub> fluxes from inter-rows during the observation period (2022–2024). Black, green and orange arrows represent the timings of fertilization, grass planting and tea pruning, respectively. Flux data are presented as mean  $\pm$  SE. CK for control; SM and HM for intercropping types, T for tea row, G for inter-row.

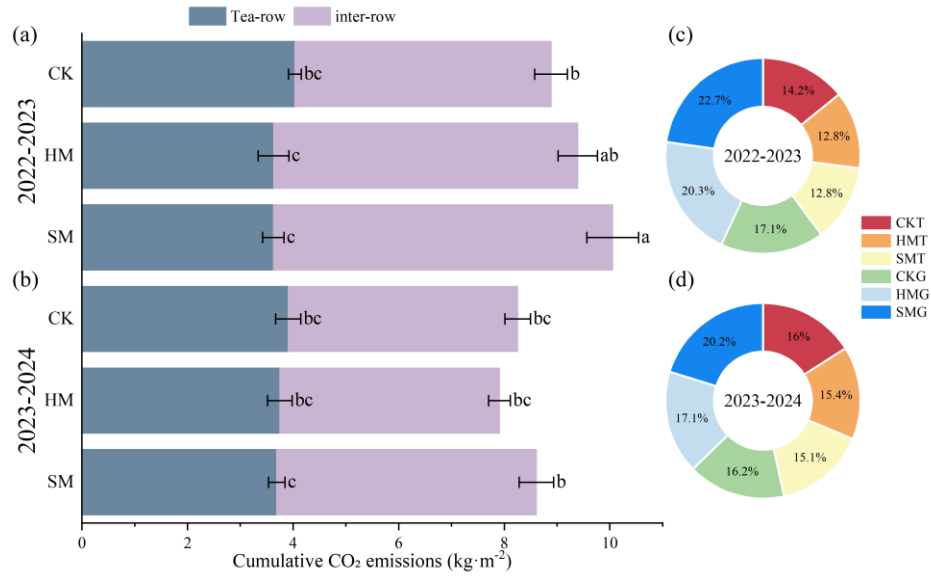

**Figure 3.** (a, b) Annual cumulative CO<sub>2</sub> emissions from tea rows and inter-rows under different green manure intercropping treatments; (c, d) contribution of tea rows and inter-rows to total annual CO<sub>2</sub> emissions under each treatment. Data shown are means  $\pm$  SE. Different superscript letters denote statistically significant differences ( $p < 0.05$ ). CK for control; SM and HM for intercropping types, T for tea row, G for inter-row.

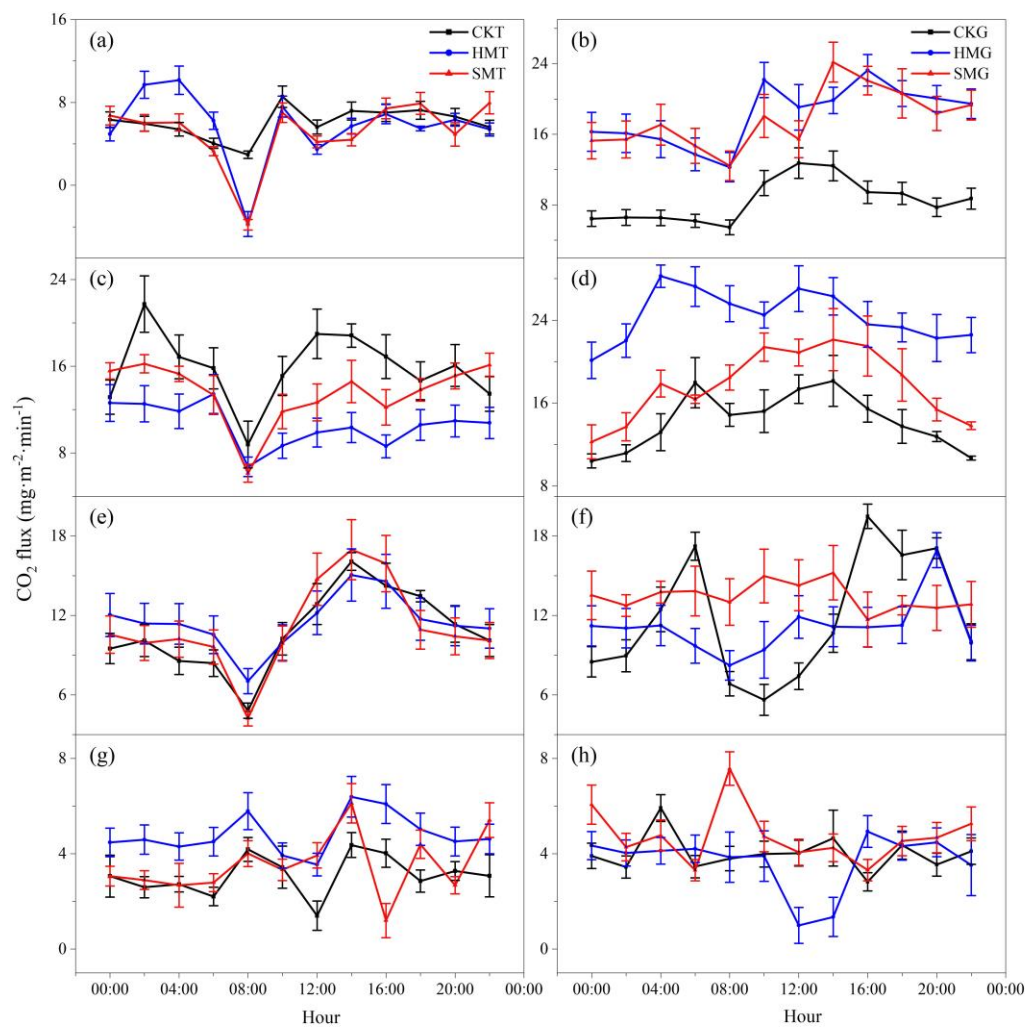

**Figure 4.** Diurnal variation in CO<sub>2</sub> fluxes from (a, c, e, g) tea rows and (b, d, f, h) inter-row zones under different green manure intercropping treatments across seasons: (a–b) spring, (c–d) summer, (e–f) autumn, and (g–h) winter. CK for control; SM and HM for intercropping types, T for tea row, G for inter-row.

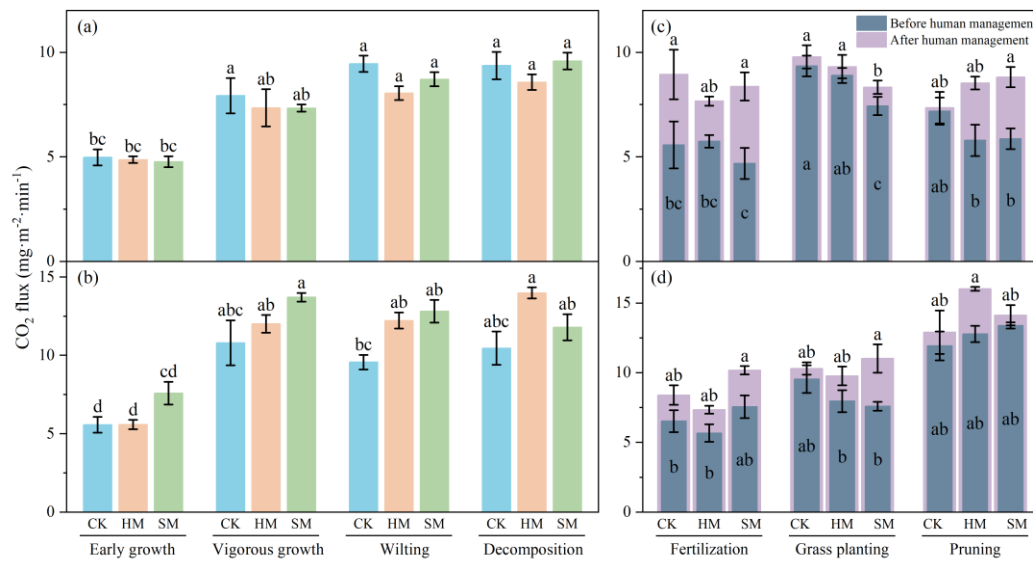

**Figure 5.** Temporal dynamics of CO<sub>2</sub> fluxes under green manure (a, b) growth stages and (c, d) management events in tea plantations. Growth stages include: early growth (mid-November to early April), vigorous growth (mid-April to late May), wilting (early June to late July), and decomposition (August). CK for control; SM and HM for intercropping types, T for tea row, G for inter-row.

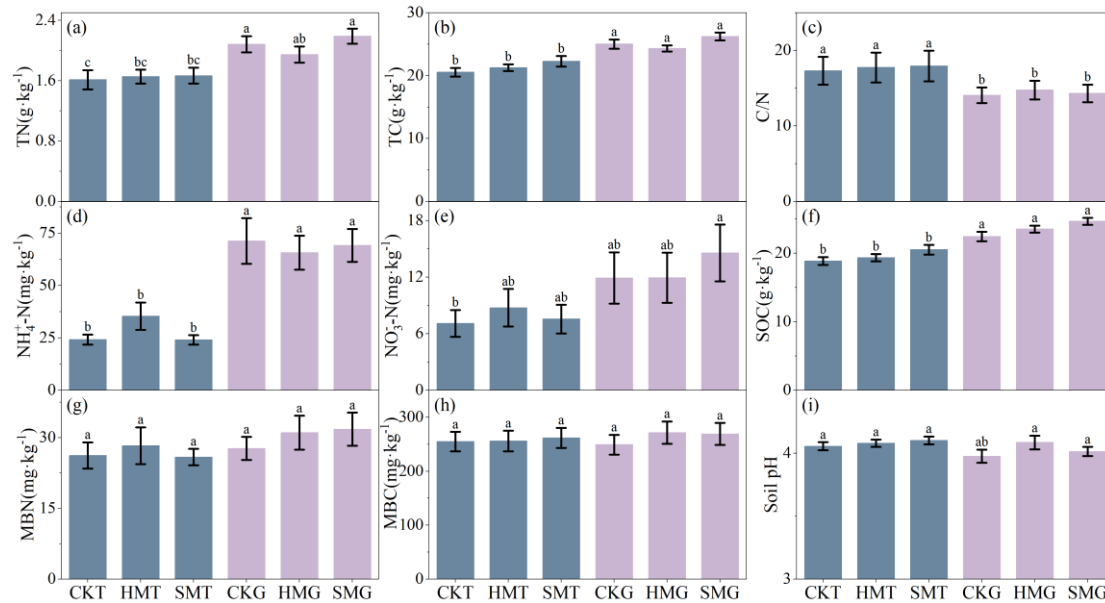

**Figure 6.** Basic physicochemical properties of soil in tea rows and inter-rows under different green manure intercropping treatments. CK for control; SM and HM for intercropping types, T for tea row, G for inter-row.

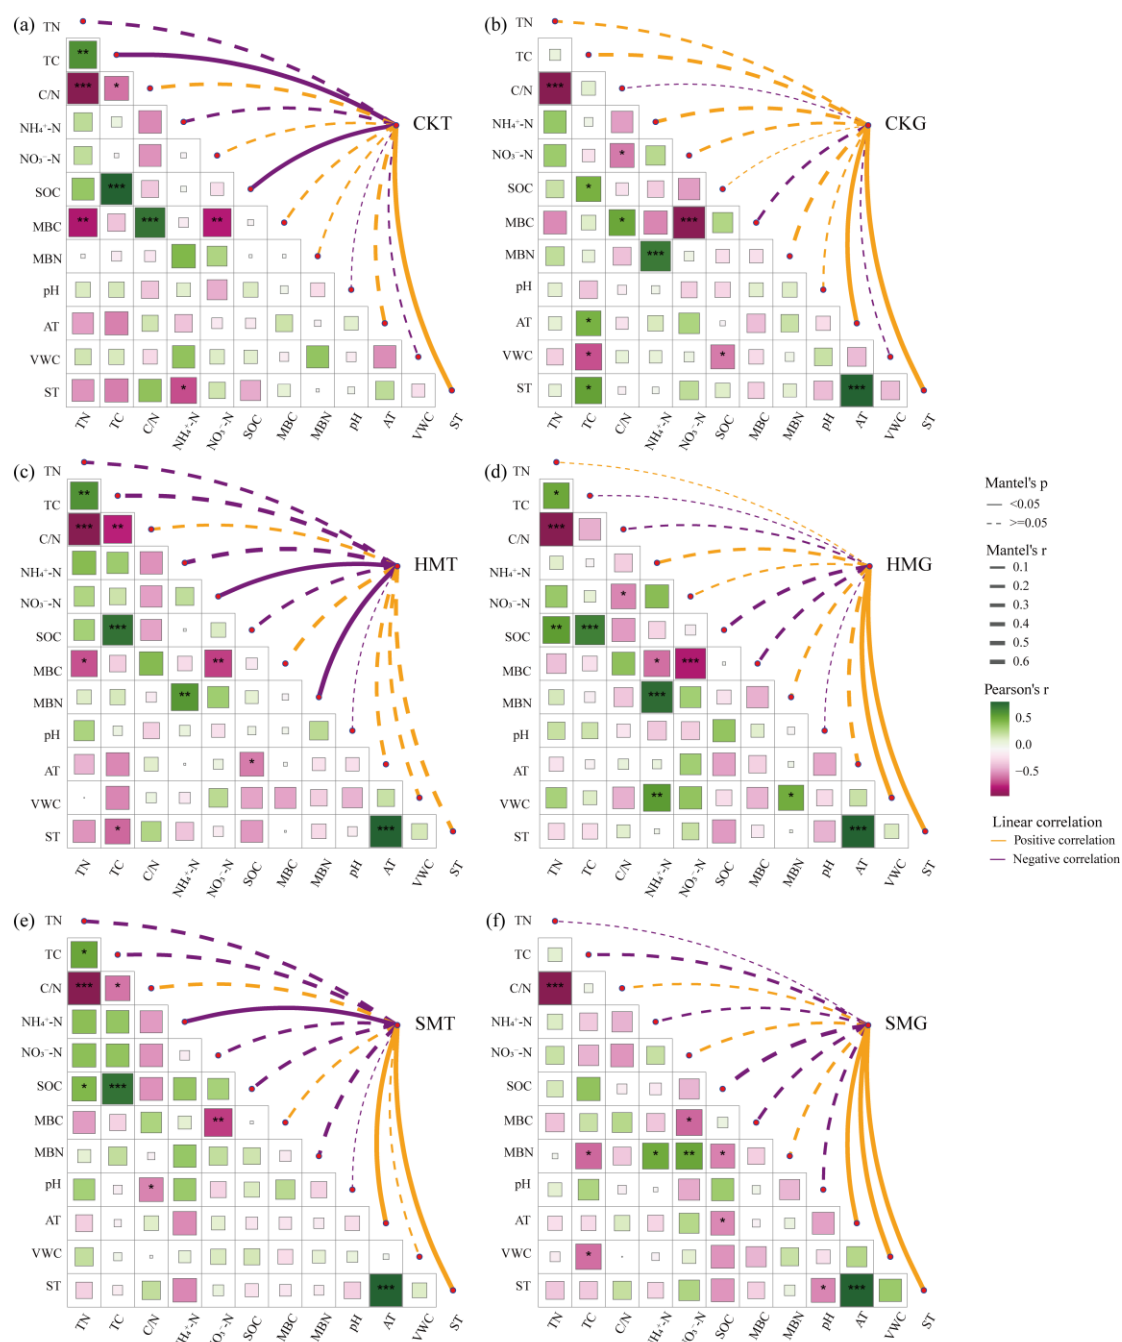

**Figure 7.** Pairwise correlations between environmental factors and their relationships with CO<sub>2</sub> fluxes under different green manure treatments (\**p* < 0.05, \*\**p* < 0.01, \*\*\**p* < 0.001). CK for control; SM and HM for intercropping types, T for tea row, G for inter-row.

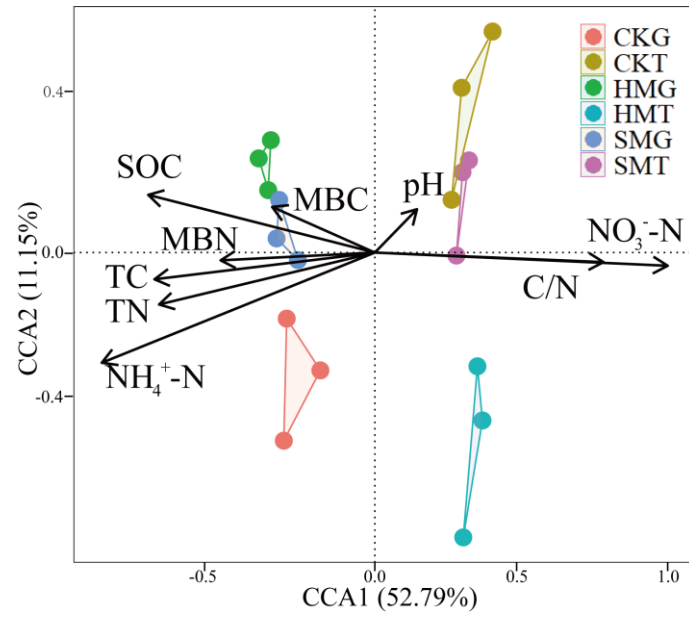

**Figure 8.** Canonical correspondence analysis (CCA) showing the influence of soil physicochemical properties on CO<sub>2</sub> emissions from tea rows and inter-rows under different green manure treatments. CK for control; SM and HM for intercropping types, T for tea row, G for inter-row.



## Appendix 1

The CO<sub>2</sub> flux was calculated using the following equation:

$$F = \rho_0 \times \frac{P}{P_0} \times \frac{T_0}{T+T_0} \times \frac{V}{M} \times \frac{\Delta c}{\Delta t} \quad (1)$$

where  $F$  is the CO<sub>2</sub> flux ( $\text{mg} \cdot \text{m}^{-2} \cdot \text{min}^{-1}$ );  $\rho_0$  is the density of CO<sub>2</sub> under standard conditions ( $1.98 \text{ kg} \cdot \text{m}^{-3}$ );  $P_0$  and  $T_0$  are the standard atmospheric pressure (101.325 kPa) and temperature (273.15 K), respectively;  $P$  and  $T$  are the atmospheric pressure (kPa) and absolute temperature (K) at the time of sampling;  $V$  and  $M$  are the volume ( $\text{m}^3$ ) and bottom area ( $\text{m}^2$ ) of the chamber, respectively;  $\Delta c/\Delta t$  is the slope of the linear or nonlinear regression of CO<sub>2</sub> concentration over time.

First, the raw CO<sub>2</sub> concentration readings were calibrated with standard gases. Then, linear regression was performed to fit their rate of change over time. Finally, CO<sub>2</sub> flux was calculated using the standard flux formula by incorporating the chamber volume, base area, and the measured atmospheric pressure and temperature.

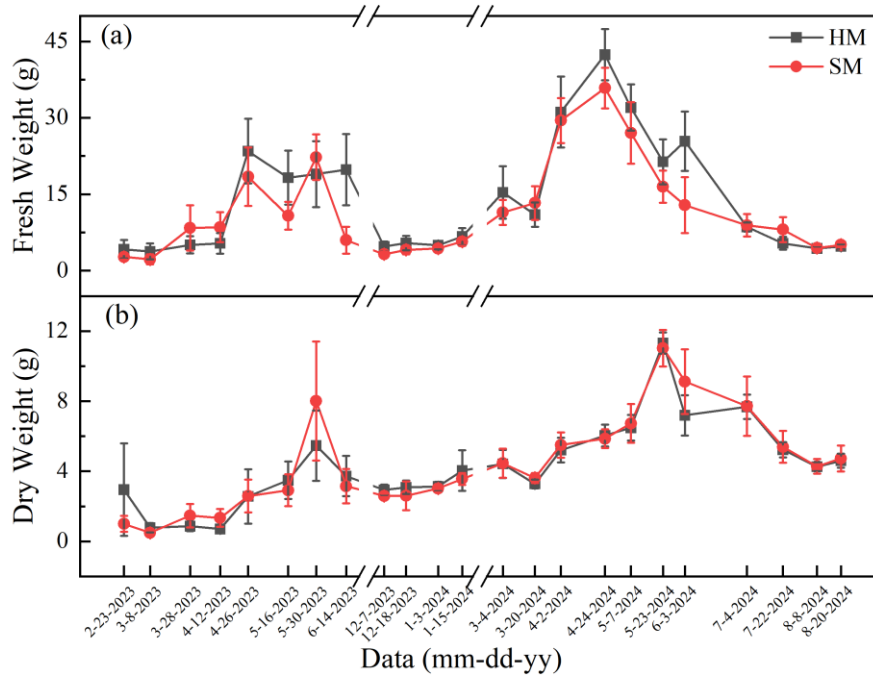

**Figure A1.** Temporal trend of green manure indexes
